# Supplementary material for: Race-free estimated glomerular filtration rate equation in kidney transplant recipients: development and validation study
Source: PubMed Central journal article supplement — BMJ. 2023 May 31;381:e073654. doi: 10.1136/bmj-2022-073654 (PMC10231444; doi:10.1136/bmj-2022-073654), 2023-05-31
Supplement: raym073654.ww.pdf [file raym073654.ww.pdf]

# Supplementary

## 1. Methods

- 1.1 Data collection procedures
- 1.2 Independent external validation cohorts
- 1.3 Transplant parameters prospectively collected in the development cohort

## 2. Tables

- Table 1 – eGFR equations : a literature review : study design, population characteristics
- Table 2 – Allocation and medical systems in the transplant centers
- Table 3 – Transplantation date and date of the last measured GFR in the transplant centers
- Table 4 – Sample size of the KRS study in comparison to studies that developed GFR equations
- Table 5 – Methods to measure creatinine and GFR in the different centers of the derivation and external validation cohorts
- Table 6 – TRIPOD checklist
- Table 7 – Statistical assumptions : comparison between additive and multiplicative models
- Table 8 – Model fit metrics : comparison between additive and multiplicative models
- Table 9 – Baseline characteristics per center (development cohort)
- Table 10 – Baseline characteristics per center (French validation cohort)
- Table 11 – Baseline characteristics per center (European validation cohort)
- Table 12 – Baseline characteristics per center (American validation cohort)
- Table 13 – Comparing P30 of current GFR equations
- Table 14 – Confidence intervals for P30 and correct classification values per cohort
- Table 15 – Confidence intervals for P10 and correct classification values per cohort
- Table 16 – Final race-free multivariable model
- Table 17 – Lasso analysis

## 3. Figures

- Figure 1 – Distribution of mGFR in all cohorts
- Figure 2 – Distribution of mGFR in all cohorts according to creatinine values
- Figure 3 – Performances of KRS GFR equations vs race-free KRS GFR equations : overall population
- Figure 4 – Performances of KRS GFR equations vs race-free KRS GFR equations : black patients
- Figure 5 – Performances of GFR equations in non-black patients
- Figure 6 – Performances of GFR equations in black patients
- Figure 7 – Performances of GFR equations in additional races
- Figure 8 – Performances of GFR equations : Bland-Altman plot
- Figure 9 – Performances of GFR equations in male patients
- Figure 10 – Performances of GFR equations in female patients
- Figure 11 – Performances of GFR equations in older patients
- Figure 12 – Performances of GFR equations in younger patients
- Figure 13 – Performances of GFR equations in underweight patients
- Figure 14 – Performances of GFR equations in normal weight patients
- Figure 15 – Performances of GFR equations in overweight patients
- Figure 16 – Performances of GFR equations in obese patients
- Figure 17 – Performances of GFR equations in creatinine measured with enzymatic method
- Figure 18 – Performances of GFR equations in creatinine measured with colorimetric method
- Figure 19 – Performances of GFR equations in patients whose GFR was measured with the <sup>99</sup>Tc-DTPA clearance
- Figure 20 – Performances of GFR equations in patients whose GFR was measured with the <sup>51</sup>Cr-EDTA clearance
- Figure 21 – Performances of GFR equations in patients whose GFR was measured with the inulin clearance
- Figure 22 – Performances of GFR equations in patients whose GFR was measured with the iothexol clearance
- Figure 23 – Performances of GFR equations in patients whose GFR was measured with the iothalamate clearance
- Figure 24 – Performances of GFR equations in living donor patients
- Figure 25 – Performances of GFR equations in deceased donor patients
- Figure 26 – Performances of GFR equations in patients with younger donor

Figure 27 – Performances of GFR equations in patients with older donor

Figure 28 – Performances of GFR equations in patients whose age discrepancy with the donor is greater than 10 years

Figure 29 – Performances of GFR equations in patients whose age discrepancy with the donor is lower than 10 years

Figure 30 – Performances of GFR equations in patients with CNI

Figure 31 – Performances of GFR equations in patients with mTOR

Figure 32 – Performances of GFR equations in patients with mTOR vs CNI : overall population

Figure 33 – Performances of GFR equations in patients with belatacept from the BENEFIT and BENEFIT-EXT trials

Figure 34 – Performances of GFR equations in patients whose GFR were measured before one year post-transplant

Figure 35 – Performances of GFR equations in patients whose GFR were measured after one year post-transplant

Figure 36 – Performances of GFR equations in patients with pre-emptive transplantation and patients transplanted after dialysis initiation

# 1 Methods

## 1.1 Data collection procedures

All data from Necker hospital (Paris, France), Saint-Louis hospital (Paris, France), and Toulouse hospital (Toulouse, France) were extracted from the prospective Paris Transplant Group Cohort data cohort. CNIL, Registration number: 363505, validated on the 8<sup>th</sup> of June 2004. The database networks have been approved by the National French Commission for bioinformatics data and patient liberty and codes were used to ensure strict donor and recipient anonymity and blind access. Informed consent was obtained from the participants at the time of transplantation. The data are entered into the database at the time of transplantation, at the time of post-transplant allograft biopsies and at each transplant anniversary and are submitted for an annual audit.

## 1.2 Independent external validation cohorts

The validation datasets in Europe are composed of eight centers: Montpellier hospital (France), Tenon hospital (France), Lyon hospital (France), Saint-Etienne hospital (France), Bergamo hospital (Italy), Zagreb hospital (Croatia), Groningen Kidney Center (The Netherlands), and Aarhus University Hospital (Denmark). The North-American validation cohort is composed of four centers: the Mayo-Clinic hospital (Rochester and Jacksonville), the ABCAN trial and the BENEFIT and BENEFIT-EXT trials. The oceanian validation cohort is composed of the Sydney Transplant Unit from Australia. All data from the French patients regarding donors and recipients were extracted from the Paris Transplant Group dataset, and from the French national agency database CRISTAL (official website: <https://www.sipg.sante.fr/portail/>). For the Croatian, Italian and Dutch patients of the European validation set and for the patients of the American validation set, data were collected as part of routine clinical practice and entered in centers' databases in compliance with local and national regulatory requirements and sent anonymized to the Paris Transplant Group. These validation cohorts followed the rules applied in each country.

## 1.3 Transplant parameters prospectively collected in the development cohort

|                                              |                                            |
|----------------------------------------------|--------------------------------------------|
| <u>Baseline recipient's characteristics:</u> |                                            |
| 1.                                           | Recipient's age                            |
| 2.                                           | Recipient's gender                         |
| 3.                                           | Recipient's height                         |
| 4.                                           | Recipient's weight                         |
| 5.                                           | Previous transplantation                   |
| 6.                                           | Delay between dialysis and transplantation |
| 7.                                           | Cause of end stage renal disease           |
| 8.                                           | ABO blood group                            |
| 9.                                           | HLA genotype                               |
| 10.                                          | CMV serology                               |
| 11.                                          | HCV serology                               |
| 12.                                          | HBV serology                               |
| 13.                                          | HIV serology                               |
| <u>Baseline donor's characteristics:</u>     |                                            |
| 14.                                          | Donor's age                                |
| 15.                                          | Donor's gender                             |
| 16.                                          | Donor's height                             |
| 17.                                          | Donor's weight                             |
| 18.                                          | Type of donor: deceased vs living          |
| 19.                                          | Cause of donor's death                     |

|                                                                                                       |                                                        |
|-------------------------------------------------------------------------------------------------------|--------------------------------------------------------|
| 20.                                                                                                   | Double transplantation                                 |
| 21.                                                                                                   | History of hypertension                                |
| 22.                                                                                                   | History of diabetes                                    |
| 23.                                                                                                   | ECD status                                             |
| 24.                                                                                                   | Serum creatinine                                       |
| 25.                                                                                                   | ABO blood group                                        |
| 26.                                                                                                   | HLA genotype                                           |
| 27.                                                                                                   | CMV serology                                           |
| 28.                                                                                                   | HCV serology                                           |
| 29.                                                                                                   | HBV serology                                           |
| 30.                                                                                                   | HIV serology                                           |
| <u>Immunological characteristics at the time of transplantation:</u>                                  |                                                        |
| 31.                                                                                                   | HLA mismatches A                                       |
| 32.                                                                                                   | HLA mismatches B                                       |
| 33.                                                                                                   | HLA mismatches Cw                                      |
| 34.                                                                                                   | HLA mismatches DQ                                      |
| 35.                                                                                                   | HLA mismatches DR                                      |
| 36.                                                                                                   | HLA mismatches DP                                      |
| 37.                                                                                                   | Anti-HLA DSA at the time of transplantation            |
| 38.                                                                                                   | MFI of the anti-HLA DSA at the time of transplantation |
| <u>Transplant characteristics:</u>                                                                    |                                                        |
| 39.                                                                                                   | Cold ischaemia time                                    |
| 40.                                                                                                   | Delayed graft function                                 |
| 41.                                                                                                   | Induction treatment with thymoglobulin                 |
| 42.                                                                                                   | Induction treatment with basiliximab                   |
| 43.                                                                                                   | Steroid dose                                           |
| <u>Immunological data at 1 year after transplantation (Luminex SA assessment A, B, C, DP, DQ, DR)</u> |                                                        |
| 44.                                                                                                   | Anti-HLA DSA                                           |
| 45.                                                                                                   | MFI of immunodominant anti-HLA DSA                     |
| <u>Histological data according to the Banff classification:</u>                                       |                                                        |
| 46.                                                                                                   | g Banff score                                          |
| 47.                                                                                                   | ptc Banff score                                        |
| 48.                                                                                                   | t Banff score                                          |
| 49.                                                                                                   | i Banff score                                          |
| 50.                                                                                                   | cg Banff score                                         |
| 51.                                                                                                   | v Banff score                                          |
| 52.                                                                                                   | mm Banff score                                         |
| 53.                                                                                                   | ci Banff score                                         |
| 54.                                                                                                   | ct Banff score                                         |
| 55.                                                                                                   | IFTA Banff score                                       |
| 56.                                                                                                   | cv Banff score                                         |
| 57.                                                                                                   | ah Banff score                                         |
| 58.                                                                                                   | C4d ptc deposition                                     |
| 59.                                                                                                   | Recurrence of ESRD                                     |
| 60.                                                                                                   | Polyomavirus-associated nephropathy                    |
| 61.                                                                                                   | ABMR status                                            |
| 62.                                                                                                   | TCMR status                                            |
| 63.                                                                                                   | Borderline category                                    |
| <u>Follow-up variables:</u>                                                                           |                                                        |
| 64.                                                                                                   | Episodes of pyelonephritis                             |



|     |                                                                                                 |
|-----|-------------------------------------------------------------------------------------------------|
| 65. | Immunosuppression treatment                                                                     |
| 66. | Type of treatment: calcineurin inhibitors, mycophenolate mofetil, mTOR inhibitors or belatacept |
| 67. | CNI blood through level at M12 and every year                                                   |
| 68. | Steroid dose at M12 and every year                                                              |
| 69. | Rejection therapy (e.g., steroid, plasma exchange, intravenous immunoglobulin)                  |
| 70. | CMV prophylaxis                                                                                 |
| 71. | BK viral load at M12 and every year                                                             |
| 72. | CMV viral load at M12 and every year                                                            |
| 73. | Allograft function at M12 and every 6 months                                                    |
| 74. | Proteinuria at M12 and every 6 months                                                           |
| 75. | Patient date and cause of allograft loss                                                        |
| 76. | Patient date and cause of death                                                                 |

## TABLES

**Table 1 - eGFR equations : a literature review : study design, population characteristics**

We reviewed the literature for studies that developed equations estimating GFR on native and kidney transplanted patients. The sign \* denotes the studies that were developed on kidney transplant populations. Equations that were developed on specific populations non-relevant to this study e.g., cancer or trauma-only patients were not listed.

| Study                 | Year | Equation name   | Number of citations | Number of centers | Development cohort size | External validation | Percentage male | Percentage black | Mean age | Mean GFR | Percentage diabetes | Percentage CKD | Percentage transplant | Filtration marker      | Creatinine measuring method | GFR measuring method         |
|-----------------------|------|-----------------|---------------------|-------------------|-------------------------|---------------------|-----------------|------------------|----------|----------|---------------------|----------------|-----------------------|------------------------|-----------------------------|------------------------------|
| Whyte et al.(1)       | 1958 | Edwards & Whyte | 43                  | 1, Australia      | 136                     | No                  | 55              | NA               | NA       | NA       | NA                  | 76             | NA                    | Creatinine             | Colorimetric                | Creatinine                   |
| Jelliffe et al.(2)    | 1971 | Jelliffe-1      | 24                  | 1, USA            | 41                      | No                  | 71              | NA               | NA       | NA       | NA                  | NA             | NA                    | Creatinine             | Colorimetric                | Creatinine                   |
| Jelliffe et al.(3)    | 1973 | Jelliffe-2      | 77                  | NA                | NA                      | No                  | NA              | NA               | NA       | NA       | NA                  | NA             | NA                    | Creatinine             | NA                          | Creatinine                   |
| Rowe et al.(4)        | 1976 | Rowe            | 24                  | Multicentric, USA | 884                     | No                  | 100             | 3                | NA       | NA       | NA                  | NA             | NA                    | Creatinine             | Colorimetric                | NA                           |
| Cockcroft et al.(5)   | 1976 | Cockcroft-Gault | 3336                | 1, USA            | 236                     | No                  | 96              | NA               | NA       | 73       | NA                  | NA             | NA                    | Creatinine             | Colorimetric                | Creatinine                   |
| Bjornsson (6)         | 1979 | Bjornsson       | 78                  | 2, USA, Denmark   | 1155                    | No                  | 81              | NA               | NA       | NA       | NA                  | NA             | NA                    | Creatinine             | Colorimetric                | Creatinine                   |
| Hull et al.(7)        | 1981 | Hull            | 34                  | 1, USA            | 103                     | No                  | 73              | NA               | 53       | NA       | NA                  | NA             | NA                    | Creatinine             | Colorimetric                | Creatinine                   |
| Gates et al.(8)       | 1985 | Gates           | 14                  | 1, USA            | 90                      | No                  | 53              | NA               | 55       | NA       | NA                  | NA             | 2                     | Creatinine             | NA                          | Creatinine                   |
| Walser et al.(9)      | 1993 | Walser          | 4                   | 1, USA            | 85                      | No                  | NA              | NA               | NA       | 13       | NA                  | 100            | NA                    | Creatinine             | Colorimetric                | <sup>99</sup> Tc-DTPA        |
| Nankivell et al.(10)* | 1995 | Nankivell       | 317                 | 1, Australia      | 146                     | No                  | 49              | NA               | 43       | 52       | NA                  | 100            | 100                   | Creatinine             | NA                          | <sup>99</sup> Tc-DTPA        |
| Baracska et al.(11)   | 1997 | Baracska        | 16                  | 1, USA            | 41                      | No                  | NA              | NA               | >65      | NA       | NA                  | NA             | NA                    | Creatinine             | NA                          | <sup>125</sup> I-iothalamate |
| Levey et al.(12)      | 1999 | MDRD            | 4410                | Multicentric, USA | 1,070                   | Yes, N= 558         | 60              | 12               | NA       | 40       | 6                   | 100            | NA                    | Creatinine             | Colorimetric                | <sup>125</sup> I-iothalamate |
| Hoek et al.(13)       | 2003 | Hoek            | 116                 | 1, Netherlands    | 93                      | No                  | 50              | NA               | 50       | 81       | NA                  | 100            | NA                    | Creatinine, Cystatin C | Enzymatic                   | <sup>125</sup> I-iothalamate |
| Rule et al.(14)       | 2004 | MCQ             | 303                 | 1, USA            | 900                     | No                  | 49              | NA               | 51       | 48       | NA                  | 36             | 6                     | Creatinine             | Colorimetric                | <sup>125</sup> I-iothalamate |
| Grubb et al.(15)      | 2005 | Grubb           | 24                  | 1, Sweden         | 451                     | No                  | 50              | NA               | 53       | NA       | NA                  | 100            | 0                     | Creatinine, Cystatin C | Enzymatic                   | Iohexol                      |
| Sjöström et al.(16)   | 2005 | NA              | 47                  | 1, Sweden         | 381                     | No                  | 48              | NA               | 56       | 59       | NA                  | 18             | 0                     | Creatinine, Cystatin C | Enzymatic                   | Iohexol                      |
| MacIsaac et al.(17)   | 2006 | MacIsaac        | 115                 | 1, Australia      | 251                     | No                  | NA              | 0                | 60       | 89       | 82                  | 100            | 0                     | Creatinine, Cystatin C | Enzymatic                   | <sup>99</sup> Tc-DTPA        |

|                                    |      |                                  |      |                                 |       |              |    |    |      |    |    |     |     |                        |                          |                                                                      |
|------------------------------------|------|----------------------------------|------|---------------------------------|-------|--------------|----|----|------|----|----|-----|-----|------------------------|--------------------------|----------------------------------------------------------------------|
| <b>Rule et al. (18)</b>            | 2006 | Rule native CKD                  | 106  | 1, USA                          | 204   | No           | 55 | NA | 55   | 50 | 18 | 100 | 0   | Cystatin C             | Enzymatic                | <sup>125</sup> I-iothalamate                                         |
| <b>Rule et al. (18) *</b>          | 2006 | Rule kidney recipient            | 106  | 1, USA                          | 103   | No           | 63 | NA | 49   | 51 | 18 | 100 | 100 | Cystatin C             | Enzymatic                | <sup>125</sup> I-iothalamate                                         |
| <b>Virga et al. (19)</b>           | 2007 | NA                               | 1    | 1, Italy                        | 530   | No           | 53 | 0  | 57   | 55 | NA | 100 | 0   | Creatinine             | Colorimetric             | Creatinine                                                           |
| <b>Stevens et al. (20)</b>         | 2008 | NA                               | 461  | Multicentric USA, 1 Europe      | 2,980 | Yes, N=438   | 63 | 53 | 52   | 48 | 13 | 100 | 0   | Cystatin C             | Enzymatic                | <sup>125</sup> I-iothalamate, <sup>51</sup> Cr-EDTA                  |
| <b>Douville et al. (21)</b>        | 2008 | CHUQ                             | 14   | 1, Canada                       | 773   | No           | 55 | <1 | 54   | 67 | NA | 100 | 0   | Creatinine             | Colorimetric             | Creatinine                                                           |
| <b>Matsuo et al. (22)</b>          | 2009 | New 3-variable Japanese equation | 1903 | Multicentric, Japan             | 413   | Yes. N= 350  | 61 | 0  | 52   | NA | NA | NA  | NA  | Creatinine             | Enzymatic                | Inulin                                                               |
| <b>Levey et al.(23)</b>            | 2009 | CKD-EPI 2009                     | 7286 | Multicentric, USA               | 5504  | Yes, N= 3896 | 47 | 32 | 47   | 68 | 29 | 70  | 4   | Creatinine             | Enzymatic                | <sup>125</sup> I-iothalamate                                         |
| <b>Diamandopoulos et al. (24)</b>  | 2010 | DAF                              | 5    | Multicentric, Greece            | 907   | No           | 54 | NA | 68   | NA | NA | 100 | NA  | Creatinine             | NA                       | NA                                                                   |
| <b>Björk et al. (25)</b>           | 2011 | LM-REV                           | 44   | 2, Sweden                       | 850   | No           | 56 | 0  | 60   | 55 | NA | 100 | NA  | Creatinine             | Colorimetric & enzymatic | Iohexol                                                              |
| <b>Alvarez-Gregori et al. (26)</b> | 2011 | HUGE                             | 8    | Multicentric, Argentina, Europe | 376   | Yes, N= 111  | 58 | NA | NA   | NA | NA | 37  | NA  | Creatinine             | NA                       | <sup>99</sup> Tc-DTPA                                                |
| <b>Schaeffner (27)</b>             | 2012 | BIS                              | 177  | 1, Germany                      | 570   | No           | 47 | NA | 78.5 | 69 | 24 | 30  | 0   | Creatinine, Cystatin C | Enzymatic                | Iohexol                                                              |
| <b>Inker et al.(28)</b>            | 2012 | CKD-EPI 2012                     | 1212 | Multicentric, USA               | 5352  | Yes, N= 1119 | 58 | 40 | 47   | 68 | 32 | 50  | 0   | Creatinine, Cystatin C | Enzymatic                | <sup>125</sup> I-iothalamate                                         |
| <b>Pottel et al.(29)</b>           | 2016 | FAS                              | 103  | 4 Europe, 1 USA                 | 6870  | No           | 53 | NA | NA   | 78 | NA | NA  | NA  | Creatinine             | Colorimetric & enzymatic | Inulin, iohexol, <sup>125</sup> I-iothalamate                        |
| <b>Salvador et al.(30)*</b>        | 2017 | NA                               | 22   | 1, Norway                       | 297   | Yes, N=297   | 67 | NA | 52   | 51 | NA | 100 | 100 | Creatinine, Cystatin C | Enzymatic                | <sup>51</sup> Cr-EDTA, iohexol                                       |
| <b>Pottel et al. (31)</b>          | 2021 | EKFC                             | 12   | Multicentric, Europe            | 11251 | Yes, N= 8378 | 56 | 0  | 42   | 77 | NA | 100 | NA  | Creatinine             | Enzymatic                | Inulin, iohexol, <sup>125</sup> I-iothalamate, <sup>51</sup> Cr-EDTA |
| <b>Inker et al.(32)</b>            | 2021 | CKD-EPI 2021                     | 7    | Multicentric, USA               | 13606 | Yes, N= 4050 | 44 | 32 | 47   | 68 | 29 | 50  | NA  | Creatinine, Cystatin C | Enzymatic                | <sup>125</sup> I-iothalamate                                         |

Abbreviations: BIS, Berlin Initiative Study ;CHUQ, Le Centre hospitalier universitaire de Quebec ; CKD, Chronic kidney disease ; CKD-EPI, Chronic Kidney Disease Epidemiology Collaboration; DAF, Diamandopoulos A. formula; DTPA, diethylenetriaminepentaacetic acid ; EDTA, ethylenediamine tetraacetic acid; EKFC, European Kidney Function Consortium equation; FAS, Full age spectrum; HUGE, Hematocrit, urea and gender equation; LM-REV, Lund-Malmö revised; MDRD, Modification of Diet in Renal Disease study; MCQ, Mayo clinic quadratic; NA, Not available

**Table 2 : Allocation and medical systems in the transplant centers**

| Cohort                                           | Allocation system                                          | Deceased / living donor rate | Dual kidney transplantation programme | Paired donor exchange national programme | ABO incompatible programme | HLA incompatible programme | Standard induction therapy protocols             |
|--------------------------------------------------|------------------------------------------------------------|------------------------------|---------------------------------------|------------------------------------------|----------------------------|----------------------------|--------------------------------------------------|
| Development cohort: Necker Hospital, France      | ABM: Agence Française Biomédecine                          | 77 % / 23%                   | YES                                   | NO                                       | YES                        | YES                        | Induction rate 100% (thymoglobulin or anti-RIL2) |
| Development cohort: Saint-Louis Hospital, France | ABM: Agence Française Biomédecine                          | 79% / 21%                    | YES                                   | NO                                       | YES                        | YES                        | Induction rate 100% (thymoglobulin or anti-RIL2) |
| Development cohort : Toulouse Hospital, France   | ABM: Agence Française Biomédecine                          | 96% / 4%                     | NO                                    | NO                                       | YES                        | YES                        | Induction rate 85% (thymoglobulin or anti-RIL2)  |
| Montpellier Hospital, France                     | ABM: Agence Française Biomédecine                          | 94% / 6%                     | YES                                   | NO                                       | NO                         | NO                         | Induction rate 100% (thymoglobulin or anti-RIL2) |
| Tenon Hospital, France                           | ABM: Agence Française Biomédecine                          | 77% / 23%                    | NO                                    | NO                                       | YES                        | YES                        | Induction rate 100% (thymoglobulin or anti-RIL2) |
| Lyon Hospital, France                            | ABM: Agence Française Biomédecine                          | NA                           | YES                                   | NO                                       | YES                        | NO                         | Induction rate 100% (thymoglobulin or anti-RIL2) |
| Saint-Etienne Hospital, France                   | ABM: Agence Française Biomédecine                          | NA                           | NO                                    | NO                                       | NO                         | NO                         | Induction rate 100% (thymoglobulin or anti-RIL2) |
| Mayo Clinic, Rochester, USA                      | UNOS United Nations for Organ Sharing                      | 28% / 72%                    | NO                                    | YES                                      | YES                        | YES                        | Induction rate 100% (thymoglobulin or anti-RIL2) |
| Mayo Clinic, Jacksonville, USA                   | UNOS United Nations for Organ Sharing                      | 70% / 30%                    | NO                                    | YES                                      | NO                         | NO                         | Induction rate 90% (thymoglobulin or anti-RIL2)  |
| ABCAN trial                                      | UNOS United Nations for Organ Sharing                      | 40% / 60%                    | YES                                   | NO                                       | NO                         | NO                         | Induction rate 100% (thymoglobulin)              |
| BENEFIT and BENEFIT-EXT trials                   | International study with many different allocation systems | 69% / 31%                    | NO                                    | NA                                       | NO                         | NA                         | Induction rate 100% (thymoglobulin or anti-RIL2) |
| Bergamo Hospital, Italy                          | EuroTransplant: EU allocation system                       | 100% / 0%                    | YES                                   | YES                                      | NO                         | NO                         | Induction rate 100% (thymoglobulin or anti-RIL2) |
| Zagreb Hospital, Croatia                         | EuroTransplant: EU allocation system                       | 98% / 2%                     | NO                                    | NO                                       | NO                         | NO                         | Induction rate 100% (thymoglobulin or anti-RIL2) |
| Groningen Kidney Center, The Netherlands         | EuroTransplant: EU allocation system                       | NA                           | YES                                   | YES                                      | YES                        | YES                        | Induction rate 100% (thymoglobulin or anti-RIL2) |
| Sydney Transplant Unit, Australia                | OrganMatch                                                 | NA                           | NO                                    | NO                                       | NO                         | NO                         | Induction rate 100% (thymoglobulin or anti-RIL2) |
| Aarhus University Hospital, Denmark              | Scandiatransplant                                          | NA                           | YES                                   | NO                                       | YES                        | YES                        | Induction rate 100% (anti-RIL2)                  |

**Table 3 : Transplantation dates and date of the last measured GFR in the transplant centers**

| <b>Center</b>                                       | <b>Transplantation date<br/>(first patient of the<br/>center)</b> | <b>Transplantation date<br/>(last patient of the<br/>center)</b> | <b>Date of the last<br/>measured GFR</b> |
|-----------------------------------------------------|-------------------------------------------------------------------|------------------------------------------------------------------|------------------------------------------|
| Development cohort: Necker Hospital,<br>France      | 02/1990                                                           | 07/2021                                                          | 12/2021                                  |
| Development cohort: Saint-Louis<br>Hospital, France | 09/2004                                                           | 06/2020                                                          | 07/2021                                  |
| Development cohort : Toulouse<br>Hospital, France   | 01/1997                                                           | 12/2011                                                          | 09/2015                                  |
| Montpellier Hospital, France                        | 09/1991                                                           | 07/2018                                                          | 11/2018                                  |
| Lyon Hospital, France                               | 01/2012                                                           | 06/2015                                                          | 07/2016                                  |
| Tenon Hospital, France                              | 10/1981                                                           | 06/2021                                                          | NA*                                      |
| Saint-Etienne Hospital, France                      | 01/2005                                                           | 01/2012                                                          | 11/2012                                  |
| Zagreb Hospital, Croatia                            | 01/2007                                                           | 01/2016                                                          | 07/2018                                  |
| Bergamo Hospital,<br>Italy                          | 02/2005                                                           | 12/2007                                                          | NA*                                      |
| Groningen Kidney Center, The<br>Netherlands         | 01/2001                                                           | 01/2021                                                          | 01/2021                                  |
| Aarhus University Hospital, Denmark                 | 06/2011                                                           | 06/2015                                                          | 06/2016                                  |
| Sydney Transplant Unit, Australia                   | 01/1989                                                           | 01/2012                                                          | NA*                                      |
| Mayo Clinic, Jacksonville, USA                      | 07/2000                                                           | 11/2011                                                          | 11/2019                                  |
| Mayo Clinic, Rochester, USA                         | 03/1990                                                           | 10/2020                                                          | 12/2021                                  |
| ABCAN trial                                         | 12/2002                                                           | 01/2008                                                          | 01/2008                                  |
| BENEFIT<br>and BENEFIT-EXT trials                   | 02/2005                                                           | 05/2005                                                          | 01/2008                                  |

\*The authors provided the transplantation period for their overall cohort, but not per patient. They also provided the delay from transplant to GFR measurement, which does not allow to deduce the exact date of the last measured GFR.

**Table 4 – Sample size of the KRS study in comparison to studies that developed GFR equations**

*Native kidney GFR equations*

| <b>Study</b>                                                                             | <b>Population</b>       | <b>Total sample size</b> | <b>Sample size of the development set</b> | <b>Sample size of the validation set</b> |
|------------------------------------------------------------------------------------------|-------------------------|--------------------------|-------------------------------------------|------------------------------------------|
| MDRD<br>(Levey et al.<br>Annals of Internal<br>Medicine ;<br>PMID :<br>10075613)         | Native kidneys          | 1628                     | 1070                                      | 558                                      |
| CKD-EPI-2009<br>(Levey et al.<br>Annals of Internal<br>Medicine ;<br>PMID :<br>19414839) | Native kidneys          | 12150                    | 8254                                      | 3896                                     |
| CKD-EPI-2021<br>(Inker et al.<br>NEJM; PMID :<br>34554658)                               | Native kidneys          | 12787                    | 8254                                      | 4050                                     |
| KRS                                                                                      | Transplanted<br>kidneys | 15489                    | 3622                                      | 11867                                    |

*Transplanted kidney GFR equations*

| <b>Study</b>                                                           | <b>Population</b>       | <b>Total sample size</b> | <b>Sample size of the development set</b> | <b>Sample size of the validation set</b> |
|------------------------------------------------------------------------|-------------------------|--------------------------|-------------------------------------------|------------------------------------------|
| Nankivell<br>(Nankivell et al.<br>Transplantation ;<br>PMID : 7604438) | Transplanted<br>kidneys | 146                      | -                                         | -                                        |
| Rule et al. Kidney<br>International ;<br>PMID : 16408133               | Transplanted<br>kidneys | 460                      | -                                         | -                                        |
| Salvador et al.<br>Transplant; PMID<br>: 29536033                      | Transplanted<br>kidneys | 594                      | 297                                       | 297                                      |
| KRS                                                                    | Transplanted<br>kidneys | 15489                    | 3622                                      | 11 867                                   |

**Table 5 - Methods to measure creatinine and GFR in the different centers of the development and external validation cohorts.**

| Cohort              | Center                         | Creatinine assay                                                            | mGFR method                                              |
|---------------------|--------------------------------|-----------------------------------------------------------------------------|----------------------------------------------------------|
| Derivation          | Necker Hospital, Paris         | Jaffe colorimetric method before 2011, then IDMS-traceable enzymatic method | <sup>51</sup> Cr-EDTA clearance*                         |
|                     | Saint-Louis Hospital, Paris    | Jaffe colorimetric method before 2019, then IDMS-traceable enzymatic method | <sup>99</sup> Tc-DTPA clearance                          |
|                     | Rangueil Hospital, Toulouse    | Jaffe colorimetric method before 2013, then IDMS-traceable enzymatic method | Inuline clearance(33)(33)                                |
| External validation | Montpellier Hospital           | Jaffe colorimetric method before 2013, then IDMS-traceable enzymatic method | <sup>99</sup> Tc-DTPA clearance                          |
|                     | Hospices Civils Hospital, Lyon | IDMS-traceable enzymatic method                                             | Inuline or iohexol clearance                             |
|                     | Tenon Hospital, Paris          | IDMS-traceable enzymatic method                                             | <sup>51</sup> Cr-EDTA clearance(34)(34)                  |
|                     | Saint-Etienne Hospital, Paris  | Jaffe colorimetric method before 2012, then IDMS-traceable enzymatic method | Inuline clearance                                        |
|                     | Bergamo hospital               | Jaffe colorimetric method before 2010, then IDMS-traceable enzymatic method | iohexol clearance                                        |
|                     | University Hospital, Zagreb    | Jaffe colorimetric method before 2014, then IDMS-traceable enzymatic method | <sup>51</sup> Cr-EDTA clearance                          |
|                     | Mayo Clinic, Rochester         | IDMS-traceable enzymatic method                                             | iothalamate clearance                                    |
|                     | Mayo Clinic, Jacksonville      | IDMS-traceable enzymatic method                                             | iothalamate clearance                                    |
|                     | ABCAN trial                    | IDMS-traceable enzymatic method                                             | iothalamate clearance                                    |
|                     | BENEFIT trial                  | IDMS-traceable enzymatic method                                             | iothalamate clearance or <sup>51</sup> Cr-EDTA clearance |
|                     | Groningen Kidney Center        | IDMS-traceable enzymatic method                                             | iothalamate clearance                                    |
|                     | Sydney Transplant Unit         | Jaffe colorimetric method before 2014, then IDMS-traceable enzymatic method | <sup>99</sup> Tc-DTPA clearance                          |
|                     | Aarhus University Hospital     | IDMS-traceable enzymatic method                                             | <sup>51</sup> Cr-EDTA clearance                          |

<sup>51</sup>Cr-EDTA, <sup>51</sup>Cr- ethylenediaminetetraacetic acid; <sup>99m</sup>Tc-DTPAT, Technetium-<sup>99</sup> diethylenetriaminepentaacetic acid

\*Measurements were also performed in Hôpital Européen Georges Pompidou, Paris, France

**Table 6 – TRIPOD checklist**

| Section/Topic             | Item | Checklist Item                                                                                                                                                                                   | Page                    |
|---------------------------|------|--------------------------------------------------------------------------------------------------------------------------------------------------------------------------------------------------|-------------------------|
| <b>Title and abstract</b> |      |                                                                                                                                                                                                  |                         |
| Title                     | 1    | Identify the study as developing and/or validating a multivariable prediction model, the target population, and the outcome to be predicted.                                                     | 1                       |
| Abstract                  | 2    | Provide a summary of objectives, study design, setting, participants, sample size, predictors, outcome, statistical analysis, results, and conclusions.                                          | 3                       |
| <b>Introduction</b>       |      |                                                                                                                                                                                                  |                         |
| Background and objectives | 3a   | Explain the medical context (including whether diagnostic or prognostic) and rationale for developing or validating the multivariable prediction model, including references to existing models. | 5, 6                    |
|                           | 3b   | Specify the objectives, including whether the study describes the development or validation of the model or both.                                                                                | 6                       |
| <b>Methods</b>            |      |                                                                                                                                                                                                  |                         |
| Source of data            | 4a   | Describe the study design or source of data (e.g., randomized trial, cohort, or registry data), separately for the development and validation data sets, if applicable.                          | 7 and appendix 3        |
|                           | 4b   | Specify the key study dates, including start of accrual; end of accrual; and, if applicable, end of follow-up.                                                                                   | 7                       |
| Participants              | 5a   | Specify key elements of the study setting (e.g., primary care, secondary care, general population) including number and location of centers.                                                     | 7 and appendix 8        |
|                           | 5b   | Describe eligibility criteria for participants.                                                                                                                                                  | 7                       |
|                           | 5c   | Give details of treatments received, if relevant.                                                                                                                                                | Appendix 8              |
| Outcome                   | 6a   | Clearly define the outcome that is predicted by the prediction model, including how and when assessed.                                                                                           | 8                       |
|                           | 6b   | Report any actions to blind assessment of the outcome to be predicted.                                                                                                                           | Not applicable          |
| Predictors                | 7a   | Clearly define all predictors used in developing or validating the multivariable prediction model, including how and when they were measured.                                                    | 8, 9 and appendix 9, 10 |



|                              |     |                                                                                                                                                                                                       |                                  |
|------------------------------|-----|-------------------------------------------------------------------------------------------------------------------------------------------------------------------------------------------------------|----------------------------------|
|                              | 7b  | Report any actions to blind assessment of predictors for the outcome and other predictors.                                                                                                            | Not applicable                   |
| Sample size                  | 8   | Explain how the study size was arrived at.                                                                                                                                                            | 7                                |
| Missing data                 | 9   | Describe how missing data were handled (e.g., complete-case analysis, single imputation, multiple imputation) with details of any imputation method.                                                  | 10                               |
| Statistical analysis methods | 10a | Describe how predictors were handled in the analyses.                                                                                                                                                 | 9, 10 and appendix 14, 15        |
|                              | 10b | Specify type of model, all model-building procedures (including any predictor selection), and method for internal validation.                                                                         | 9,10 and appendix 14, 15, 16     |
|                              | 10d | Specify all measures used to assess model performance and, if relevant, to compare multiple models.                                                                                                   | 10 and appendix 16               |
| Risk groups                  | 11  | Provide details on how risk groups were created, if done.                                                                                                                                             | 11                               |
| <b>Results</b>               |     |                                                                                                                                                                                                       |                                  |
| Participants                 | 13a | Describe the flow of participants through the study, including the number of participants with and without the outcome and, if applicable, a summary of the follow-up time. A diagram may be helpful. | 13                               |
|                              | 13b | Describe the characteristics of the participants (basic demographics, clinical features, available predictors), including the number of participants with missing data for predictors and outcome.    | 13, 25 and appendix 17-20        |
| Model development            | 14a | Specify the number of participants and outcome events in each analysis.                                                                                                                               | 13-16                            |
|                              | 14b | If done, report the unadjusted association between each candidate predictor and outcome.                                                                                                              | Not applicable                   |
| Model specification          | 15a | Present the full prediction model to allow predictions for individuals (i.e., all regression coefficients, and model intercept or baseline survival at a given time point).                           | 14 and appendix 22               |
|                              | 15b | Explain how to use the prediction model.                                                                                                                                                              | 14                               |
| Model performance            | 16  | Report performance measures (with CIs) for the prediction model.                                                                                                                                      | 13-16 and appendix 21, 22, 25-55 |
| <b>Discussion</b>            |     |                                                                                                                                                                                                       |                                  |

|                |     |                                                                                                                                                    |        |
|----------------|-----|----------------------------------------------------------------------------------------------------------------------------------------------------|--------|
| Limitations    | 18  | Discuss any limitations of the study (such as non representative sample, few events per predictor, missing data).                                  | 19, 20 |
| Interpretation | 19b | Give an overall interpretation of the results, considering objectives, limitations, and results from similar studies, and other relevant evidence. | 17-19  |
| Implications   | 20  | Discuss the potential clinical use of the model and implications for future research.                                                              | 19     |

**Table 7 – Statistical assumptions : comparison between additive and multiplicative models**

This table shows the six statistical assumptions that should be checked in linear regression model, for the final additive model, and the final multiplicative model. Overall, all assumptions were validated, except for the collinearity of predictors in the multiplicative model : the risk of collinearity was moderate in the multiplicative model and low in the additive model.

| Assumptions for developing a linear regression model                                                                       | Status (additive model)                                                                                                                                                    | Status (multiplicative model)                                                              |
|----------------------------------------------------------------------------------------------------------------------------|----------------------------------------------------------------------------------------------------------------------------------------------------------------------------|--------------------------------------------------------------------------------------------|
| #1 The patients are independent.                                                                                           | ✓                                                                                                                                                                          | ✓                                                                                          |
| #2 The outcome is equally varied (variance should not be related to mean as they are supposed to be estimated separately). | ✓<br>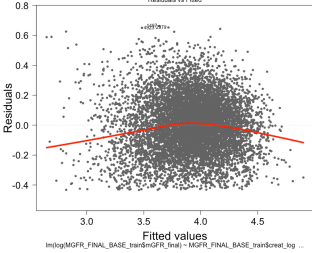                                                                                     | ✓<br>   |
| #3 The predictors are normally or uniformly distributed.                                                                   | ✓<br>(creatinine was log-transformed, and recipient age is gaussian)                                                                                                       | ✓<br>(creatinine was log-transformed, and recipient age is gaussian)                       |
| #4 The relationship between the linear predictors and the outcome should be linear.                                        | <br> | ✓<br> |

|                                                                                                                                                                                                                                     |                                                                                                                                                                                                                                                                                                                                           |                                                                                                                                                                                                                                                                                                                                                                                                                                                                    |
|-------------------------------------------------------------------------------------------------------------------------------------------------------------------------------------------------------------------------------------|-------------------------------------------------------------------------------------------------------------------------------------------------------------------------------------------------------------------------------------------------------------------------------------------------------------------------------------------|--------------------------------------------------------------------------------------------------------------------------------------------------------------------------------------------------------------------------------------------------------------------------------------------------------------------------------------------------------------------------------------------------------------------------------------------------------------------|
| <p><b>#5</b> The number of predictors should be lower than the number of patients.</p>                                                                                                                                              |                                                                                                                                                                                                                                                          |                                                                                                                                                                                                                                                                                                                                                                                 |
| <p><b>#6</b> Predictors should not be collinear. The variance-inflation-factor evaluates the risk of collinearity. Values close to 1 indicate a low risk of collinearity. Values beyond 5 indicate a high risk of collinearity.</p> | <br><p><b>Variance-inflation-factor</b><br/>       (adding creatinine<sup>2</sup> providing better results especially at lower GFR)</p> <p>Creatinine = 1.12<br/>       Creatinine<sup>2</sup> = 3.42<br/>       Age = 1.01<br/>       Gender = 1.12</p> | <br><p><b>Variance-inflation-factor</b><br/>       (data were centered to avoid bias. Results were similar with addition of the creatinine<sup>2</sup>)</p> <p>Creatinine = 2.85<br/>       Age = 2.99<br/>       Gender = 1.30<br/>       Creatinine*Age = 2.79<br/>       Creatinine* Gender = 2.56<br/>       Age*Gender = 3.01<br/>       Creatinine *Age*Gender = 2.49</p> |

**Table 8 – Model fit metrics : comparison between additive and multiplicative models**

This table shows the adjusted  $R^2$ , the root-mean-square-error, and the mean absolute error of the final additive model and the final multiplicative model. Since the additive and multiplicative models present with the same fit, and since the additive model has a lower risk of collinearity (see table 4), and is simpler to use, we focused on the additive model.

| <b>Model fit</b>                                             | <b>Additive model</b> | <b>Multiplicative model</b> |
|--------------------------------------------------------------|-----------------------|-----------------------------|
| <b>Adjusted <math>R^2</math></b>                             | 0.73                  | 0.73                        |
| <b>Root-mean-square-error</b>                                | 0.18                  | 0.18                        |
| <b>Mean absolute error<br/>(in mL/min/1.73m<sup>2</sup>)</b> | 7.48                  | 7.47                        |

**Table 9 – Baseline characteristics per center (development cohort)**

|                                                                |      | Necker Hospital<br>(n= 2,737) |  | Saint Louis Hospital<br>(n= 374) |                     | Toulouse Hospital<br>(n= 511) |                     | p      |
|----------------------------------------------------------------|------|-------------------------------|--|----------------------------------|---------------------|-------------------------------|---------------------|--------|
|                                                                | N    |                               |  | N                                |                     | N                             |                     |        |
| <b>Recipient characteristics</b>                               |      |                               |  |                                  |                     |                               |                     |        |
| <b>Age</b> (years) mean (SD)                                   | 2737 | 51.10 (14.17)                 |  | 374                              | 50.86 (14.30)       | 511                           | 53.48 (12.89)       | 0.001  |
| <b>Gender male</b> No. (%)                                     | 2737 | 1635 (59.74)                  |  | 374                              | 227 (60.70)         | 511                           | 309 (60.47)         | 0.91   |
| <b>BMI</b> (Kg/m <sup>2</sup> ) mean (SD)                      | 2737 | 24.70 (4.58)                  |  | 374                              | 25.21 (4.67)        | 511                           | 24.72 (4.27)        | 0.12   |
| <b>Black race</b> No. (%)                                      | 2737 | 237 (8.66)                    |  | 374                              | 83 (22.19)          | 511                           | 13 (2.54)           | <0.001 |
| <b>Measured GFR</b> (ml/min/1.73m <sup>2</sup> ) median (IQR)  | 2737 | 55.00 (43.00-66.95)           |  | 374                              | 49.30 (37.15-59.21) | 511                           | 52.39 (41.00-67.00) | <0.001 |
| <b>End stage kidney disease causes</b>                         |      |                               |  |                                  |                     |                               |                     |        |
| <b>Glomerulonephritis</b> No. (%)                              | 2737 | 649 (23.71)                   |  | 374                              | 89 (23.80)          | 511                           | 165 (32.29)         |        |
| <b>Diabetes</b> No. (%)                                        | 2737 | 245 (8.95)                    |  | 374                              | 61 (16.31)          | 511                           | 52 (10.18)          | <0.001 |
| <b>Vascular</b> No. (%)                                        | 2737 | 204 (7.45)                    |  | 374                              | 68 (18.18)          | 511                           | 47 (9.20)           |        |
| <b>Other</b> No. (%)                                           | 2737 | 1636 (59.77)                  |  | 374                              | 156 (41.71)         | 511                           | 246 (48.14)         |        |
| <b>Donor characteristics</b>                                   |      |                               |  |                                  |                     |                               |                     |        |
| <b>Age</b> (years) mean (SD)                                   | 2737 | 52.22 (16.67)                 |  | 374                              | 50.37 (16.36)       | 511                           | 50.47 (15.09)       | 0.30   |
| <b>Male gender</b> No. (%)                                     | 2713 | 1429 (52.67)                  |  | 374                              | 211 (56.42)         | 0                             | NA                  | 0.09   |
| <b>Hypertension</b> No. (%)                                    | 2107 | 349 (16.56)                   |  | 322                              | 41 (12.73)          | 279                           | 71 (25.45)          | <0.001 |
| <b>Diabetes mellitus</b> No. (%)                               | 2219 | 155 (6.99)                    |  | 358                              | 18 (5.03)           | 392                           | 25 (6.38)           | 0.38   |
| <b>Creatinine&gt;1.5mg/dL</b> No. (%)                          | 2689 | 272 (10.12)                   |  | 364                              | 32 (8.79)           | 503                           | 61 (12.13)          | 0.25   |
| <b>Donor type</b>                                              |      |                               |  |                                  |                     |                               |                     |        |
| <b>Deceased donor</b> No. (%)                                  | 2725 | 2103 (77.17)                  |  | 374                              | 297 (79.41)         | 511                           | 490 (95.89)         | <0.001 |
| <b>Transplant baseline characteristics</b>                     |      |                               |  |                                  |                     |                               |                     |        |
| <b>Prior kidney transplant</b> No. (%)                         | 2732 | 492 (18.01)                   |  | 374                              | 59 (15.78)          | 0                             | NA                  | 0.09   |
| <b>Delayed graft function</b> No. (%)                          | 2693 | 685 (25.44)                   |  | 368                              | 79 (21.47)          | 503                           | 117 (23.26)         | 0.18   |
| <b>Cold ischemia time in deceased donors</b> (hours) mean (SD) | 2737 | 16.52 (10.46)                 |  | 374                              | 13.32 (7.47)        | 0                             | NA                  | <0.001 |
| <b>HLA-A/B/DR mismatch number</b> mean (SD)                    | 2737 | 4.26 (1.39)                   |  | 374                              | 4.57 (1.29)         | 0                             | NA                  | <0.001 |

**Table 10 – Baseline characteristics per center (French validation cohort)**

|                                                                | Montpellier Hospital<br>(n= 1,486) |                     | Tenon Hospital<br>(n= 469) |                     | Lyon Hospital<br>(n=248) |                     | Saint Etienne<br>Hospital<br>(n= 446) |                     | p      |
|----------------------------------------------------------------|------------------------------------|---------------------|----------------------------|---------------------|--------------------------|---------------------|---------------------------------------|---------------------|--------|
|                                                                | N                                  |                     | N                          |                     | N                        |                     | N                                     |                     |        |
| <b>Recipient characteristics</b>                               |                                    |                     |                            |                     |                          |                     |                                       |                     |        |
| <b>Age</b> (years) mean (SD)                                   | 1486                               | 53.15 (13.55)       | 469                        | 49.05 (13.57)       | 248                      | 50.75 (14.21)       | 446                                   | 54.91 (13.55)       | <0.001 |
| <b>Gender male</b> No. (%)                                     | 1486                               | 937 (63.06)         | 469                        | 305 (65.03)         | 248                      | 161 (64.92)         | 446                                   | 297 (66.59)         | 0.54   |
| <b>BMI</b> (Kg/m <sup>2</sup> ) mean (SD)                      | 1486                               | 24.70 (4.52)        | 469                        | 25.58 (4.79)        | 248                      | 24.78 (4.21)        | 446                                   | 25.00 (4.27)        | 0.03   |
| <b>Black race</b> No. (%)                                      | 1486                               | 4 (0.27)            | 469                        | 139 (29.64)         | 248                      | 7 (2.82)            | 446                                   | 0 (0.00)            | <0.001 |
| <b>Measured GFR</b> (ml/min/1.73m <sup>2</sup> ) median (IQR)  | 1486                               | 49.00 (36.13-62.67) | 469                        | 47.20 (33.30-60.70) | 248                      | 52.27 (41.56-62.00) | 446                                   | 51.00 (38.14-66.24) | <0.001 |
| <b>End stage kidney disease causes</b>                         |                                    |                     |                            |                     |                          |                     |                                       |                     |        |
| <b>Glomerulonephritis</b> No. (%)                              | 1140                               | 345 (30.26)         | 0                          | NA                  | 242                      | 44 (18.18)          | 0                                     | NA                  | <0.001 |
| <b>Diabetes</b> No. (%)                                        | 1140                               | 81 (7.11)           | 0                          | NA                  | 242                      | 57 (23.55)          | 0                                     | NA                  |        |
| <b>Vascular</b> No. (%)                                        | 1140                               | 56 ( 4.91)          | 0                          | NA                  | 242                      | 29 (11.98)          | 0                                     | NA                  |        |
| <b>Other</b> No. (%)                                           | 1140                               | 658 (57.72)         | 0                          | NA                  | 242                      | 112 (46.28)         | 0                                     | NA                  |        |
| <b>Donor characteristics</b>                                   |                                    |                     |                            |                     |                          |                     |                                       |                     |        |
| <b>Age</b> (years) mean (SD)                                   | 0                                  | NA                  | 469                        | 52.03 (15.50)       | 242                      | 51.38 (15.93)       | 0                                     | NA                  | 0.42   |
| <b>Male gender</b> No. (%)                                     | 1132                               | 643 (56.80)         | 469                        | 235 (50.11)         | 242                      | 149 (61.57)         | 0                                     | NA                  | 0.28   |
| <b>Hypertension</b> No. (%)                                    | 929                                | 155 (16.68)         | 0                          | NA                  | 0                        | NA                  | 0                                     | NA                  | NA     |
| <b>Diabetes mellitus</b> No. (%)                               | 783                                | 40 (5.11)           | 0                          | NA                  | 0                        | NA                  | 0                                     | NA                  | NA     |
| <b>Creatinine &gt; 1.5mg/dL</b> No. (%)                        | 942                                | 136 (14.44)         | 0                          | NA                  | 242                      | 31 (12.81)          | 0                                     | NA                  | 0.33   |
| <b>Donor type</b>                                              |                                    |                     |                            |                     |                          |                     |                                       |                     |        |
| <b>Deceased donor</b> No. (%)                                  | 1135                               | 1062 (93.57)        | 439                        | 340 (77.45)         | 0                        | NA                  | 0                                     | NA                  | <0.001 |
| <b>Transplant baseline characteristics</b>                     |                                    |                     |                            |                     |                          |                     |                                       |                     |        |
| <b>Prior kidney transplant</b> No. (%)                         | 0                                  | NA                  | 0                          | NA                  | 242                      | 34 (14.05)          | 446                                   | 0 (0.0)             | NA     |
| <b>Delayed graft function</b> No. (%)                          | 1101                               | 154 (13.99)         | 0                          | NA                  | 0                        | NA                  | 0                                     | NA                  | NA     |
| <b>Cold ischemia time in deceased donors</b> (hours) mean (SD) | 1486                               | 18.50 (8.59)        | 40                         | 16.57 (6.33)        | 239                      | 12.45 (6.54)        | 0                                     | NA                  | <0.001 |
| <b>HLA-A/B/DR mismatch number</b> mean (SD)                    | 1486                               | 2.93 (1.30)         | 434                        | 4.29 (1.40)         | 248                      | 3.40 (1.22)         | 0                                     | NA                  | <0.001 |

**Table 11 – Baseline characteristics per center (European and Oceanian validation cohorts)**

|                                                                     | Zagreb Hospital<br>(n= 883) |                         | Bergamo Hospital<br>(n= 196) |                         | Groningen Kidney<br>Center<br>(n= 1738) |                         | M Aarhus Hospital<br>(n= 80) |                         | Sydney Transplant<br>Unit (n= 430) |                         | P      |
|---------------------------------------------------------------------|-----------------------------|-------------------------|------------------------------|-------------------------|-----------------------------------------|-------------------------|------------------------------|-------------------------|------------------------------------|-------------------------|--------|
|                                                                     | N                           |                         | N                            |                         | N                                       |                         | N                            |                         | N                                  |                         |        |
| <b>Recipient characteristics</b>                                    |                             |                         |                              |                         |                                         |                         |                              |                         |                                    |                         |        |
| <b>Age</b> (years) mean (SD)                                        | 883                         | 50.06 (12.46)           | 196                          | 50.38 (13.25)           | 1738                                    | 50.59 (13.72)           | 80                           | 53.34 (12.13)           | 430                                | 41.00 (10.34)           | <0.001 |
| <b>Gender male</b> No. (%)                                          | 883                         | 536 (60.70)             | 196                          | 138 (70.41)             | 1738                                    | 1044 (60.07)            | 80                           | 58 (72.50)              | 430                                | 236 (54.88)             | <0.001 |
| <b>BMI</b> (Kg/m <sup>2</sup> ) mean (SD)                           | 883                         | 25.33 (3.76)            | 196                          | 23.67 (3.63)            | 1738                                    | 25.91 (10.36)           | 80                           | 24.95 (3.41)            | 189                                | 25.91 (4.32)            | 0.002  |
| <b>Black race</b> No. (%)                                           | 883                         | 0.00 (0.00)             | 196                          | 0.00 (0.00)             | 1738                                    | 0.00 (0.00)             | 80                           | 0.00 (0.00)             | 430                                | 0.00 (0.00)             | <0.001 |
| <b>Measured GFR</b><br>(ml/min/1.73m <sup>2</sup> )<br>median (IQR) | 883                         | 58.95 (44.81-<br>74.10) | 196                          | 52.18 (40.11-<br>63.05) | 1738                                    | 51.56 (40.44-<br>62.87) | 80                           | 46.60 (36.35-<br>58.15) | 430                                | 58.00 (42.20-<br>72.00) | <0.001 |
| <b>End stage kidney disease causes</b>                              |                             |                         |                              |                         |                                         |                         |                              |                         |                                    |                         |        |
| <b>Glomerulonephritis</b> No. (%)                                   | 883                         | 336 (38.05)             | 196                          | 63 (32.14)              | 0                                       | NA                      | 0                            | NA                      | 0                                  | NA                      |        |
| <b>Diabetes</b> No. (%)                                             | 883                         | 52 (5.89)               | 196                          | 2.0 (1.02)              | 0                                       | NA                      | 0                            | NA                      | 0                                  | NA                      | <0.001 |
| <b>Vascular</b> No. (%)                                             | 883                         | 135 (15.29)             | 196                          | 5.0 (2.55)              | 0                                       | NA                      | 0                            | NA                      | 0                                  | NA                      |        |
| <b>Other</b> No. (%)                                                | 883                         | 360 (40.77)             | 196                          | 126 (64.29)             | 0                                       | NA                      | 0                            | NA                      | 0                                  | NA                      |        |
| <b>Donor characteristics</b>                                        |                             |                         |                              |                         |                                         |                         |                              |                         |                                    |                         |        |
| <b>Age</b> (years) mean (SD)                                        | 883                         | 50.34 (12.67)           | 196                          | 49.0 (17.22)            | 1735                                    | 49.79 (13.51)           | 80                           | 53.94 (12.88)           | 0                                  | NA                      | <0.001 |
| <b>Male gender</b> No. (%)                                          | 883                         | 501 (56.74)             | 196                          | 98 (50.00)              | 0                                       | NA                      | 76                           | 40 (52.63)              | 0                                  | NA                      | 0.28   |
| <b>Hypertension</b> No. (%)                                         | 883                         | 388 (43.94)             | 196                          | 36 (18.37)              | 0                                       | NA                      | 0                            | NA                      | 0                                  | NA                      | <0.001 |
| <b>Diabetes mellitus</b> No. (%)                                    | 883                         | 62 (7.02)               | 196                          | 4.0 (2.04)              | 0                                       | NA                      | 0                            | NA                      | 0                                  | NA                      | 0.008  |
| <b>Creatinine &gt; 1.5mg/dL</b> No. (%)                             | 862                         | 126 (14.62)             | 0                            | NA                      | 0                                       | NA                      | 0                            | NA                      | 0                                  | NA                      | NA     |
| <b>Donor type</b>                                                   |                             |                         |                              |                         |                                         |                         |                              |                         |                                    |                         |        |
| <b>Deceased donor</b> No. (%)                                       | 883                         | 863 (97.73)             | 196                          | 196 (100.00)            | 0                                       | NA                      | 0                            | NA                      | 0                                  | NA                      | 0.02   |
| <b>Transplant baseline characteristics</b>                          |                             |                         |                              |                         |                                         |                         |                              |                         |                                    |                         |        |
| <b>Prior kidney transplant</b> No. (%)                              | 883                         | 80 (9.06)               | 196                          | 0.0 (0.00)              | 0                                       | NA                      | 0                            | NA                      | 0                                  | NA                      | <0.001 |
| <b>Delayed graft function</b> No. (%)                               | 883                         | 205 (23.22)             | 0                            | NA                      | 0                                       | NA                      | 80                           | 18 (22.50)              | 0                                  | NA                      | 1      |
| <b>Cold ischemia time in deceased donors</b> (hours) mean (SD)      | 473                         | 21.20 (15.58)           | 196                          | 16.54 (3.76)            | 0                                       | NA                      | 80                           | 12.80(4.59)             | 0                                  | NA                      | <0.001 |
| <b>HLA-A/B/DR mismatch number</b> mean (SD)                         | 869                         | 3.00 (1.10)             | 196                          | 3.29 (1.32)             | 0                                       | NA                      | 0                            | NA                      | 0                                  | NA                      | <0.001 |



**Table 12 – Baseline characteristics per center (American validation cohort)**

|                                                                       | Mayo Clinic Hospital,<br>Minnesota<br>(n=4,062) |                         | Mayo Clinic<br>Hospital, Florida<br>(n= 709) |                         | ABCAN trial<br>(n=139) |                         | BENEFIT trial<br>(n= 981) |                         | p      |
|-----------------------------------------------------------------------|-------------------------------------------------|-------------------------|----------------------------------------------|-------------------------|------------------------|-------------------------|---------------------------|-------------------------|--------|
|                                                                       | N                                               |                         | N                                            |                         | N                      |                         | N                         |                         |        |
| <b>Recipient characteristics</b>                                      |                                                 |                         |                                              |                         |                        |                         |                           |                         |        |
| <b>Age</b> (years) mean (SD)                                          | 4062                                            | 53.08 (13.46)           | 709                                          | 53.00 (13.24)           | 139                    | 48.31 (12.30)           | 981                       | 49.37 (14.45)           | <0.001 |
| <b>Gender male</b> No. (%)                                            | 4062                                            | 2382 (58.64)            | 709                                          | 434 (61.21)             | 139                    | 88 (63.31)              | 981                       | 671 (68.40)             | <0.001 |
| <b>BMI</b> (Kg/m <sup>2</sup> ) mean (SD)                             | 4006                                            | 29.00 (6.68)            | 707                                          | 28.32 (5.58)            | 139                    | 26.35 (5.00)            | 941                       | 26.32 (4.56)            | <0.001 |
| <b>Black race</b> No. (%)                                             | 4062                                            | 115 (2.83)              | 709                                          | 228 (32.16)             | 139                    | 0.00 (0.00)             | 981                       | 105 (10.70)             | <0.001 |
| <b>Measured GFR</b> (ml/min/1.73m <sup>2</sup> )<br>median (IQR)      | 4062                                            | 55.00 (43.00-<br>67.00) | 709                                          | 60.00 (45.00-<br>75.00) | 139                    | 56.30 (48.60-<br>68.00) | 981                       | 58.00 (45.00-<br>73.00) | <0.001 |
| <b>End stage kidney disease<br/>causes</b>                            |                                                 |                         |                                              |                         |                        |                         |                           |                         |        |
| <b>Glomerulonephritis</b> No. (%)                                     | 3965                                            | 872 (21.99)             | 530                                          | 173 (32.64)             | 139                    | 0 (0.00)                | 0                         | NA                      |        |
| <b>Diabetes</b> No. (%)                                               | 3965                                            | 748 (18.87)             | 530                                          | 160 (30.19)             | 139                    | 52 (37.41)              | 0                         | NA                      | <0.001 |
| <b>Vascular</b> No. (%)                                               | 3965                                            | 257 (6.48)              | 530                                          | 159 (30.00)             | 139                    | 8 (5.76)                | 0                         | NA                      |        |
| <b>Other</b> No. (%)                                                  | 3965                                            | 2088 (52.66)            | 530                                          | 40 (7.55)               | 139                    | 79 (56.83)              | 0                         | NA                      |        |
| <b>Donor characteristics</b>                                          |                                                 |                         |                                              |                         |                        |                         |                           |                         |        |
| <b>Age</b> (years) mean (SD)                                          | 4062                                            | 43.68 (15.36)           | 707                                          | 39.18 (14.05)           | 0                      | NA                      | 979                       | 47.22 (14.88)           | <0.001 |
| <b>Male gender</b> No. (%)                                            | 4062                                            | 1857 (45.72)            | 707                                          | 391 (55.30)             | 0                      | NA                      | 980                       | 473 (48.27)             | <0.001 |
| <b>Hypertension</b> No. (%)                                           | 0                                               | NA                      | 0                                            | NA                      | 0                      | NA                      | 0                         | NA                      | NA     |
| <b>Diabetes mellitus</b> No. (%)                                      | 0                                               | NA                      | 0                                            | NA                      | 0                      | NA                      | 0                         | NA                      | NA     |
| <b>Creatinine &gt; 1.5mg/dL</b> No. (%)                               | 0                                               | NA                      | 0                                            | NA                      | 0                      | NA                      | 0                         | NA                      | NA     |
| <b>Donor type</b>                                                     |                                                 |                         |                                              |                         |                        |                         |                           |                         |        |
| <b>Deceased donor</b> No. (%)                                         | 4062                                            | 1140 (28.06)            | 709                                          | 497 (70.10)             | 139                    | 40 (28.78)              | 981                       | 672 (68.50)             | <0.001 |
| <b>Transplant baseline<br/>characteristics</b>                        |                                                 |                         |                                              |                         |                        |                         |                           |                         |        |
| <b>Prior kidney transplant</b> No. (%)                                | 4062                                            | 612 (15.07)             | 709                                          | 68 (9.59)               | 139                    | 18 (12.95)              | 0                         | NA                      | <0.001 |
| <b>Delayed graft function</b> No. (%)                                 | 3961                                            | 270 (6.82)              | 707                                          | 139 (19.66)             | 0                      | NA                      | 981                       | 280 (28.54)             | <0.001 |
| <b>Cold ischemia time in<br/>deceased donors</b> (hours) mean<br>(SD) | 2943                                            | 5.61 (9.96)             | 365                                          | 8.47 (8.35)             | 0                      | NA                      | 971                       | 13.4 (10.40)            | <0.001 |
| <b>HLA-A/B/DR mismatch<br/>number</b> mean (SD)                       | 3944                                            | 3.34 (1.83)             | 699                                          | 3.92 (1.64)             | 0                      | NA                      | 981                       | 3.36 (1.30)             | <0.001 |

**Table 13 – Comparing P<sub>30</sub> of current GFR equations**

For each equation, the highest P<sub>30</sub> is highlighted in green. The median P<sub>30</sub> of the race-free CKD-EPI-2021, CKD-EPI-2009 and MDRD equations were compared to the median P<sub>30</sub> of the race-free KRS equation using a Wilcoxon test.

| Cohort                               | MDRD  | CKD-EPI-2009 | Race-free CKD-EPI-2021 | Race-free KRS |
|--------------------------------------|-------|--------------|------------------------|---------------|
| Development cohort                   | 87.2% | 85.6%        | 84.2%                  | 89.8%         |
| Montpellier, transplant department   | 92.3% | 91.3%        | 88.4%                  | 88.5%         |
| Tenon, transplant department         | 81.1% | 81.3%        | 82.1%                  | 86.4%         |
| Lyon, transplant department          | 89.5% | 79.0%        | 70.2%                  | 86.3%         |
| Saint-Etienne, transplant department | 83.9% | 82.8%        | 77.2%                  | 83.2%         |
| Mayo Clinic                          | 82.4% | 82.4%        | 83.4%                  | 84.1%         |
| ABCAN trial                          | 88.5% | 88.5%        | 85.6%                  | 90.6%         |
| BENEFIT and BENEFIT-EXT trials       | 79.1% | 75.3%        | 71.6%                  | 78.4%         |
| Bergamo hospital                     | 94.3% | 90.3%        | 84.2%                  | 91.3%         |
| Zagreb hospital                      | 57.1% | 63.6%        | 70.6%                  | 73.0%         |
| Groningen Kidney Center              | 91.2% | 91.1%        | 87.0%                  | 90.6%         |
| Sydney Transplant Unit               | 74.0% | 77.3%        | 78.3%                  | 80.6%         |
| Aarhus University Hospital           | 89.9% | 86.3%        | 83.5%                  | 85.6%         |

KRS & CKD-EPI-2021 : P = 0.003 (Wilcoxon test)

KRS & CKD-EPI-2009 : P = 0.04

KRS & MDRD : P = 0.85

**Table 14 – Confidence intervals for P<sub>30</sub> and correct classification values per cohort**

This table shows the P<sub>30</sub> and correct classification percentages with their 95% confidence intervals. They are presented by cohort and compared according to the equation used.

| Cohort                         | MDRD                       |                                   | CKD-EPI-2009               |                                   | Race-free CKD-EPI-2021     |                                   | Race-free KRS              |                                   |
|--------------------------------|----------------------------|-----------------------------------|----------------------------|-----------------------------------|----------------------------|-----------------------------------|----------------------------|-----------------------------------|
|                                | P <sub>30</sub> % (95% CI) | Correct classification % (95% CI) | P <sub>30</sub> % (95% CI) | Correct classification % (95% CI) | P <sub>30</sub> % (95% CI) | Correct classification % (95% CI) | P <sub>30</sub> % (95% CI) | Correct classification % (95% CI) |
| Developement                   | 87.2 (85.9 to 88.1)        | 72.7 (71.5 to 74.5)               | 85.6 (84.9 to 87.1)        | 71.9 (70.5 to 73.5)               | 84.2 (82.8 to 85.2)        | 70.6 (69.5 to 72.5)               | 89.8 (89.0 to 91.0)        | 75.1 (73.6 to 0.76)               |
| Montpellier                    | 92.3 (90.6 to 93.4)        | 77.3 (74.9 to 79.1)               | 91.3 (89.5 to 92.5)        | 78.9 (76.9 to 81.1)               | 88.4 (86.4 to 90.0)        | 76.6 (74.9 to 79.1)               | 88.5 (87.4 to 90.6)        | 76.4 (73.8 to 78.2)               |
| Tenon                          | 81.1 (77.5 to 84.6)        | 66.9 (62.7 to 71.3)               | 81.3 (77.5 to 84.6)        | 68.7 (64.8 to 73.2)               | 82.1 (78.5 to 85.5)        | 67.6 (63.8 to 72.2)               | 86.4 (82.9 to 89.1)        | 71.1 (66.9 to 75.1)               |
| Lyon                           | 89.5 (85.1 to 92.9)        | 73.4 (67.5 to 78.5)               | 79.0 (73.9 to 84.1)        | 64.5 (59.1 to 70.9)               | 70.2 (64.3 to 75.7)        | 58.1 (51.86 to 64.14)             | 86.3 (81.7 to 90.3)        | 74.2 (68.5 to 79.5)               |
| Saint-Etienne                  | 83.9 (80.6 to 87.4)        | 69.8 (65.8 to 74.3)               | 82.8 (79.5 to 86.5)        | 68.2 (63.7 to 72.3)               | 77.2 (73.1 to 80.9)        | 66 (61.6 to 70.4)                 | 83.2 (79.5 to 86.5)        | 68.5 (64.7 to 73.3)               |
| Mayo Clinic                    | 82.4 (80.9 to 83.1)        | 64.8 (63.7 to 66.4)               | 82.4 (80.9 to 83.1)        | 65.9 (64.7 to 67.3)               | 83.4 (81.9 to 84.1)        | 68 (66.7 to 69.3)                 | 84.1 (83.0 to 85.0)        | 66.6 (65.7 to 68.3)               |
| ABCAN trial                    | 88.5 (83.8 to 94.2)        | 67.6 (60.3 to 75.8)               | 88.5 (83.8 to 94.2)        | 66.9 (59.2 to 74.8)               | 85.6 (80.2 to 91.8)        | 63.3 (55.0 to 71.0)               | 90.6 (86.2 to 95.8)        | 66.2 (58.1 to 73.9)               |
| Benefit and Benefit-EXT trials | 79.1 (76.5 to 81.6)        | 63.7 (61.0 to 67.0)               | 75.3 (72.3 to 77.8)        | 61.6 (59.0 to 65.0)               | 71.6 (69.2 to 74.8)        | 60.8 (58.0 to 64.1)               | 78.4 (75.4 to 80.6)        | 65.1 (62.0 to 68.0)               |
| Bergamo                        | 94.3 (90.7 to 97.3)        | 76.8 (71.1 to 83.0)               | 90.3 (85.8 to 94.2)        | 76.8 (71.1 to 83.0)               | 84.2 (78.9 to 89.1)        | 71.5 (65.7 to 78.3)               | 91.3 (87.0 to 95.0)        | 79.3 (73.3 to 84.7)               |
| Zagreb                         | 57.1 (53.7 to 60.3)        | 47.1 (43.7 to 50.3)               | 63.6 (60.8 to 67.2)        | 51.9 (48.7 to 55.3)               | 70.6 (68.0 to 74.0)        | 56.2 (52.7 to 59.3)               | 73 (70.1 to 75.9)          | 55.9 (52.7 to 59.3)               |
| Groningen                      | 91.2 (89.7 to 92.4)        | 75.5 (74.0 to 87.0)               | 91.1 (89.7 to 92.4)        | 75.8 (74.0 to 87.0)               | 87.0 (85.4 to 88.8)        | 72.5 (70.9 to 75.1)               | 90.6 (89.7 to 92.4)        | 76.3 (74.0 to 78.0)               |
| Sydney                         | 74.0 (69.9 to 78.2)        | 56.8 (52.3 to 61.7)               | 77.3 (73.0 to 81.0)        | 60 (55.4 to 64.6)                 | 78.3 (74.1 to 81.9)        | 62.2 (57.4 to 66.6)               | 80.6 (77.3 to 84.7)        | 62.5 (58.4 to 67.6)               |
| Aarhus                         | 89.9 (83.4 to 96.6)        | 75.5 (66.7 to 85.4)               | 86.3 (78.4 to 93.8)        | 72.7 (63.3 to 82.7)               | 83.5 (76.0 to 92.03)       | 71.2 (61.1 to 80.9)               | 85.6 (78.4 to 93.6)        | 76.3 (66.6 to 85.4)               |

CI, confidence interval

**Table 15 – Confidence intervals for P<sub>10</sub> and correct classification values per cohort**

This table shows the P<sub>10</sub> with their 95% confidence intervals.

| <b>Cohort</b>                             | <b>MDRD</b>             | <b>CKD-EPI-2009</b>     | <b>Race-free<br/>CKD-EPI-2021</b> | <b>Race-free<br/>KRS</b> |
|-------------------------------------------|-------------------------|-------------------------|-----------------------------------|--------------------------|
| <b>Development</b>                        | 38.2%<br>(36.6 to 39.8) | 37.9%<br>(35.6 to 38.8) | 36.2%<br>(34.6 to 37.8)           | 40.7%<br>(39.1 to 42.3)  |
| <b>Montpellier</b>                        | 46.6%<br>(44.1 to 49.1) | 48.4%<br>(45.9 to 50.9) | 41.9%<br>(39.4 to 44.4)           | 39.2%<br>(36.7 to 41.7)  |
| <b>Tenon</b>                              | 32.3%<br>(28.1 to 36.5) | 32.8%<br>(28.6 to 37.0) | 34.0%<br>(29.7 to 38.3)           | 41.0%<br>(36.5 to 45.5)  |
| <b>Lyon</b>                               | 44.0%<br>(37.8 to 50.2) | 31.9%<br>(26.1 to 37.7) | 27.8%<br>(22.2 to 33.4)           | 41.9%<br>(35.8 to 48.0)  |
| <b>Saint-Etienne</b>                      | 35.8%<br>(31.4 to 40.2) | 33.3%<br>(28.9 to 37.7) | 31.1%<br>(26.8 to 35.4)           | 34.2%<br>(29.8 to 38.6)  |
| <b>Mayo Clinic</b>                        | 29.2%<br>(27.9 to 30.4) | 31.0%<br>(29.7 to 32.3) | 34.4%<br>(33.1 to 35.7)           | 32.8%<br>(31.5 to 34.1)  |
| <b>ABCAN trial</b>                        | 38.8%<br>(30.7 to 46.9) | 41.7%<br>(33.5 to 49.9) | 37.4%<br>(29.4 to 45.4)           | 43.9%<br>(35.6 to 52.2)  |
| <b>BENEFIT and<br/>BENEFIT-EXT trials</b> | 32.1%<br>(29.2 to 35.0) | 32.2%<br>(29.3 to 35.1) | 28.9%<br>(26.1 to 31.7)           | 33.3%<br>(30.4 to 36.2)  |
| <b>Bergamo</b>                            | 45.8%<br>(38.8 to 52.8) | 44.6%<br>(37.6 to 51.6) | 38.4%<br>(31.8 to 45.4)           | 49.1%<br>(42.1 to 56.1)  |
| <b>Zagreb</b>                             | 16.0%<br>(13.6 to 18.4) | 19.6%<br>(17.0 to 22.2) | 23.6%<br>(20.8 to 26.4)           | 22.3%<br>(19.6 to 25.0)  |
| <b>Groningen</b>                          | 40.0%<br>(37.7 to 42.3) | 42.4%<br>(40.1 to 44.7) | 40.7%<br>(38.4 to 43.0)           | 43.6%<br>(41.3 to 45.9)  |
| <b>Sydney</b>                             | 25.7%<br>(23.6 to 27.8) | 30.0%<br>(27.8 to 32.2) | 32.4%<br>(30.2 to 34.6)           | 32.2%<br>(30.0 to 34.4)  |
| <b>Aarhus</b>                             | 37.4%<br>(26.8 to 48.0) | 38.8%<br>(28.1 to 49.5) | 36.6%<br>(26.0 to 47.2)           | 38.8%<br>(28.1 to 49.5)  |

**Table 16 – Final race-free multivariable model**

This table shows the coefficients of the final, multivariable, additive, linear model. As the use of race did not significantly increase the prediction performances, the following equation based on the coefficients is race-free:  $eGFR = e^{4.4275492 - 0.8230475 \times \log(\text{creatinine in mg/dL}) - 0.0124264 \times \text{creatinine}^2 \text{ in mg/dL} - 0.0055068 \times \text{age in years} + 0.1806494 \text{ (if the patient is male)}}$

| Parameters                          | Number of patients | Number of measurements | Estimates  | Standard error | p-value |
|-------------------------------------|--------------------|------------------------|------------|----------------|---------|
| Intercept                           | 3,622              | 8,827                  | 4.4275492  | 0.0078821      | < 0.001 |
| Creatinine (mg/dL, log-transformed) | 3,622              | 8,827                  | -0.8230475 | 0.0111887      | < 0.001 |
| Creatinine <sup>2</sup> (mg/dL)     | 3,622              | 8,827                  | -0.0124264 | 0.0014831      | < 0.001 |
| Age (years)                         | 3,622              | 8,827                  | -0.0055068 | 0.0001356      | < 0.001 |
| Gender (if male)                    | 3,622              | 8,827                  | 0.1806494  | 0.0041897      | < 0.001 |

**Table 17 – Lasso analysis**

When performing a standard linear regression based on the parameters selected by the Lasso regressions, we obtained a P<sub>30</sub> of 89%, the same as the current KRS equation, which contains less parameters and is therefore easier to implement and use in clinical practice.

The difference between the performances of the Lasso regression, and linear regressions based on the Lasso parameters' selection, mainly stems from a suboptimal estimation of the intercept. When using log(mGFR) as the outcome, the performances remained the same. Overall, the selection of donor parameters with Lasso regressions did not improve the performances of the model.

Based on these results, we conserved the KRS equation.

| Method used                                         | Set of parameters selected                                                                                                                         | P <sub>30</sub> using the coefficients of the Lasso regression | P <sub>30</sub> using the coefficients of the standard linear regression with the variables selected by Lasso |
|-----------------------------------------------------|----------------------------------------------------------------------------------------------------------------------------------------------------|----------------------------------------------------------------|---------------------------------------------------------------------------------------------------------------|
| Standard linear regression with mGFR as the outcome | Recipient: sex, creatinine, creatinine <sup>2</sup> , age                                                                                          | Not applicable                                                 | 89% (reference model)                                                                                         |
| Lasso regression with mGFR as the outcome           | Recipient: sex, creatinine, age, race, weight, height, delayed graft function, cause of ESRD<br><br>Donor type (deceased/living), donor creatinine | 72% (no performance improvement)                               | 89% (no performance improvement)                                                                              |

### 3 Figures

Figure 1 – Distribution of mGFR in all cohorts

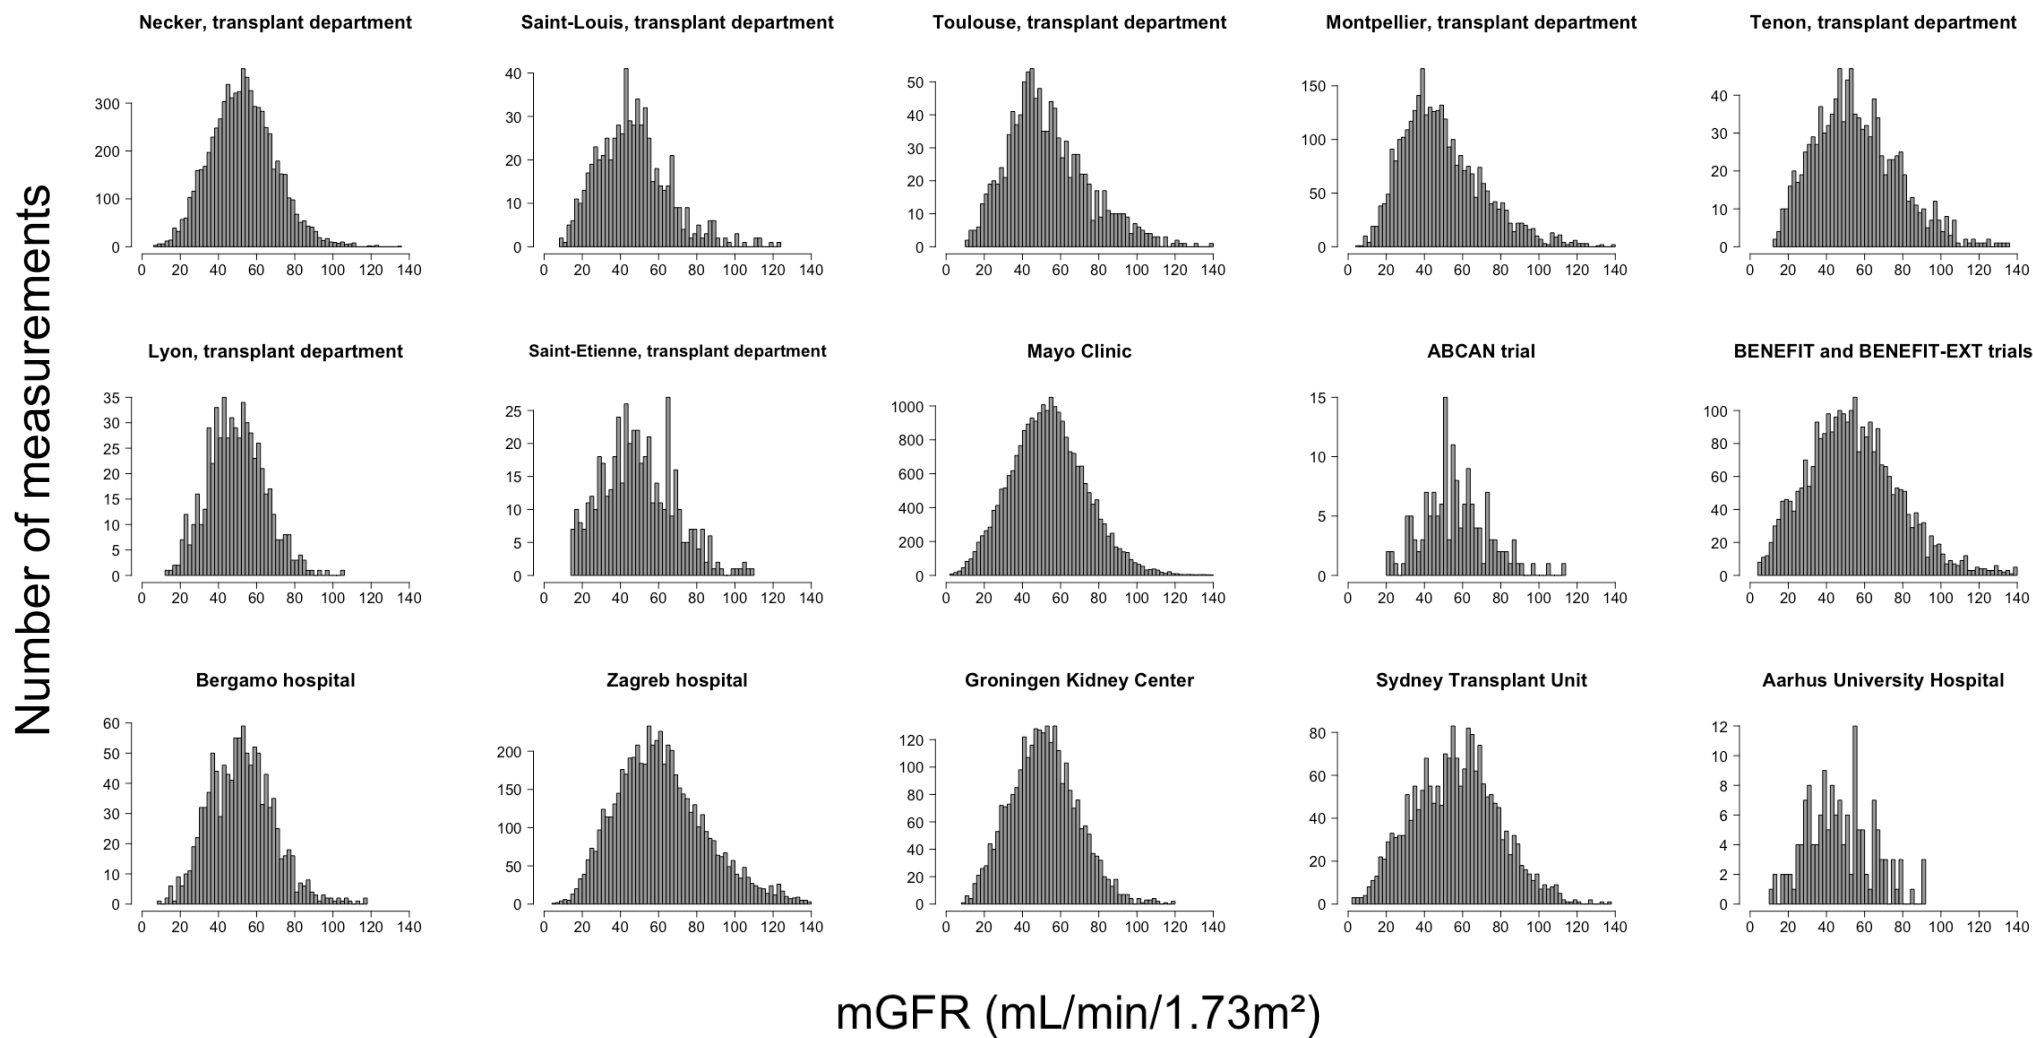

Figure 2 – Distribution of mGFR in all cohorts according to creatinine values

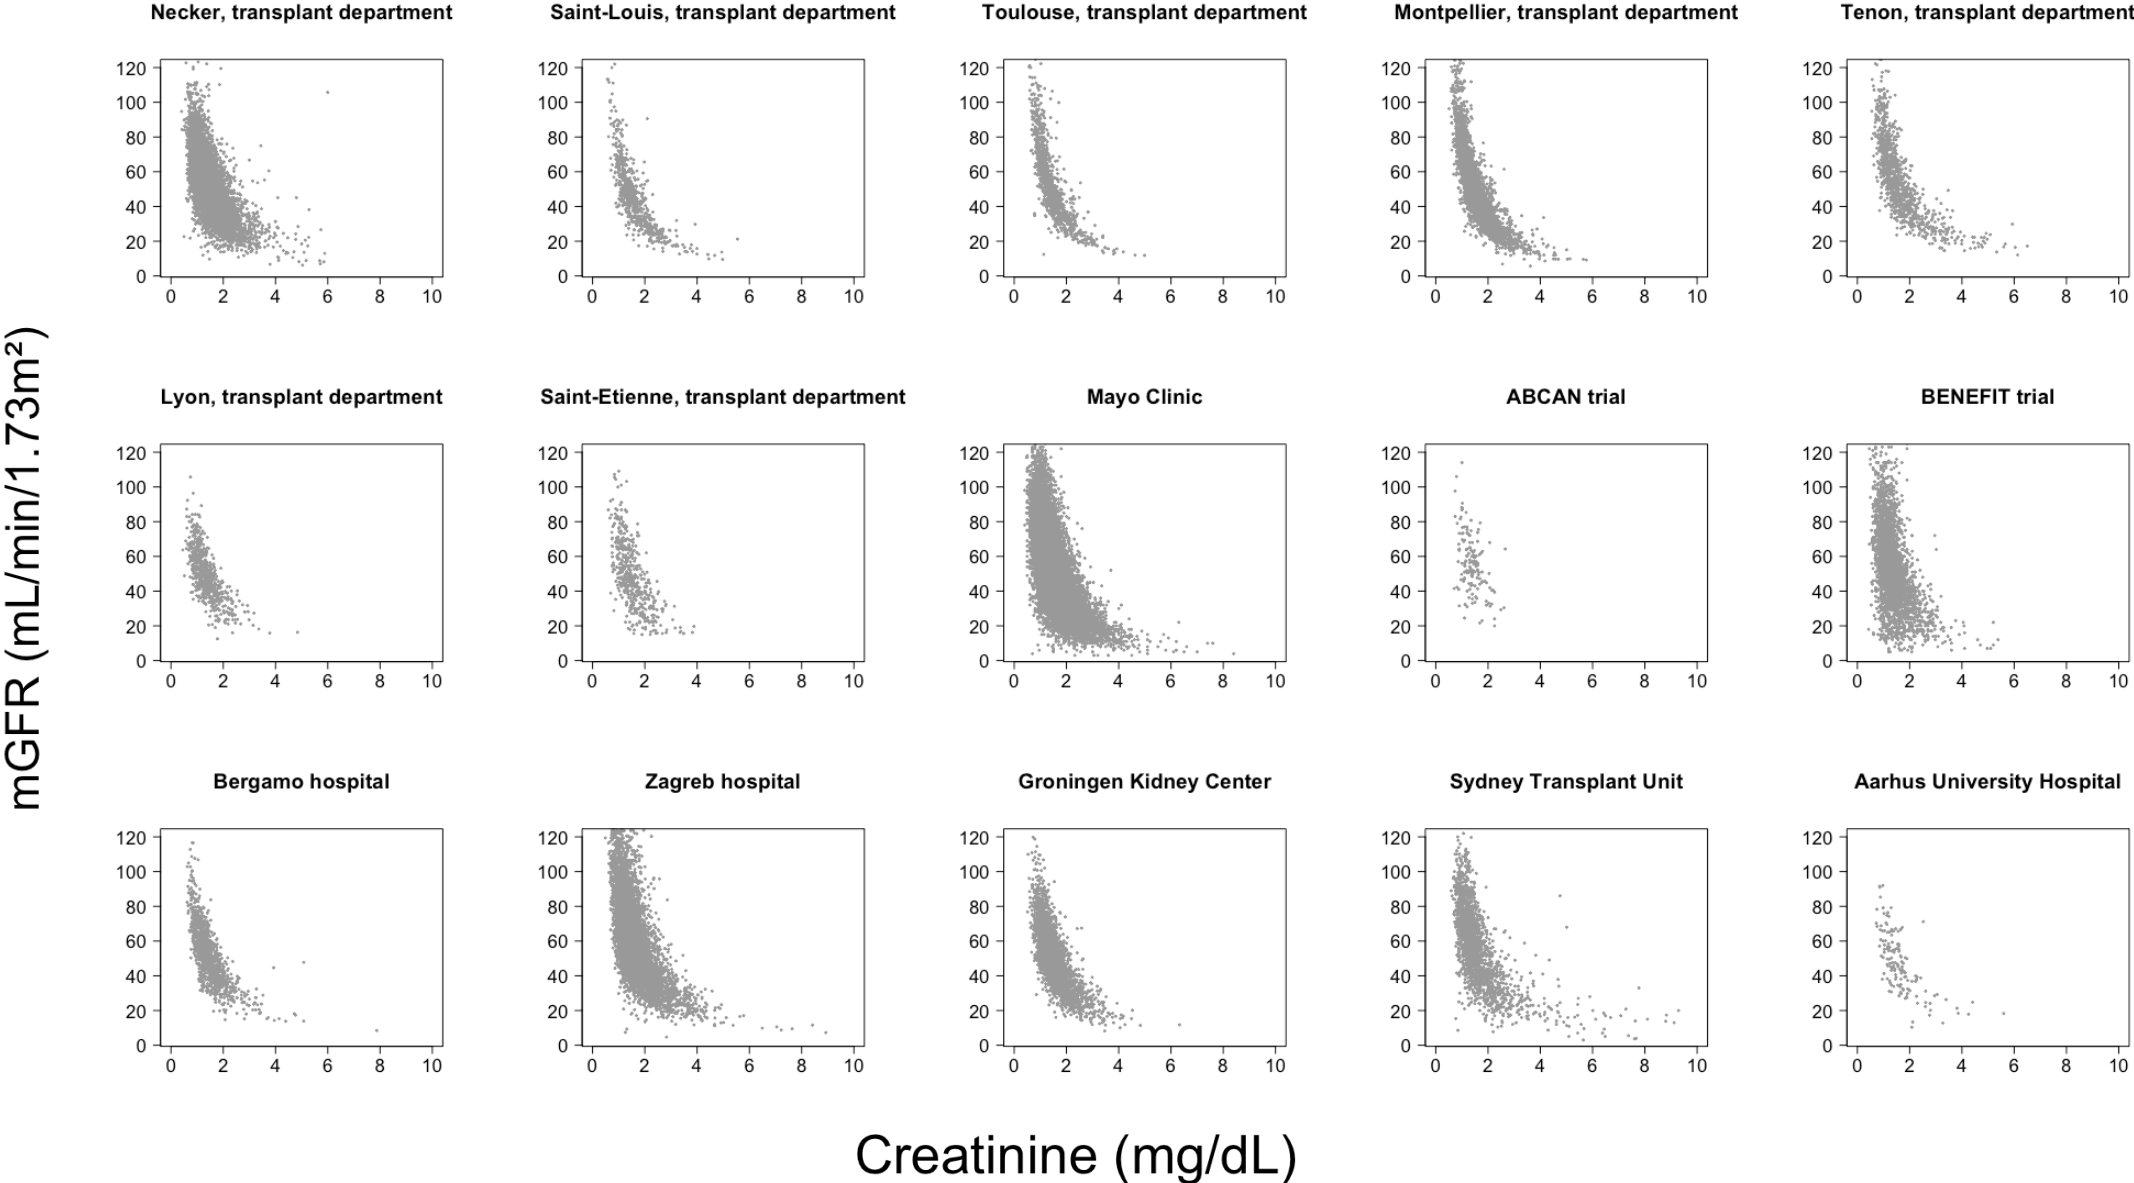

**Figure 3 – Performances of KRS GFR equations vs race-free KRS GFR equation : overall population**

The graphs show the P<sub>30</sub> and the correct classification metrics for the four GFR equations, in the french development cohort, and in the external validation cohorts gathering : Montpellier, transplant department (panel A), Tenon, transplant department (B), and Mayo-Clinic, Rochester (D). eGFR was calculated with the kidney-recipients-specific (KRS) GFR equations, and the race-free KRS GFR equations on the basis of recipient creatinine, age, gender, and race (if required by the equation). The P<sub>30</sub> is the proportion of the eGFR within the 30% of the mGFR. The correct classification is the agreement between eGFR and mGFR according to the GFR stages. As the performances were very similar, we chose to adopt the race-free equation.

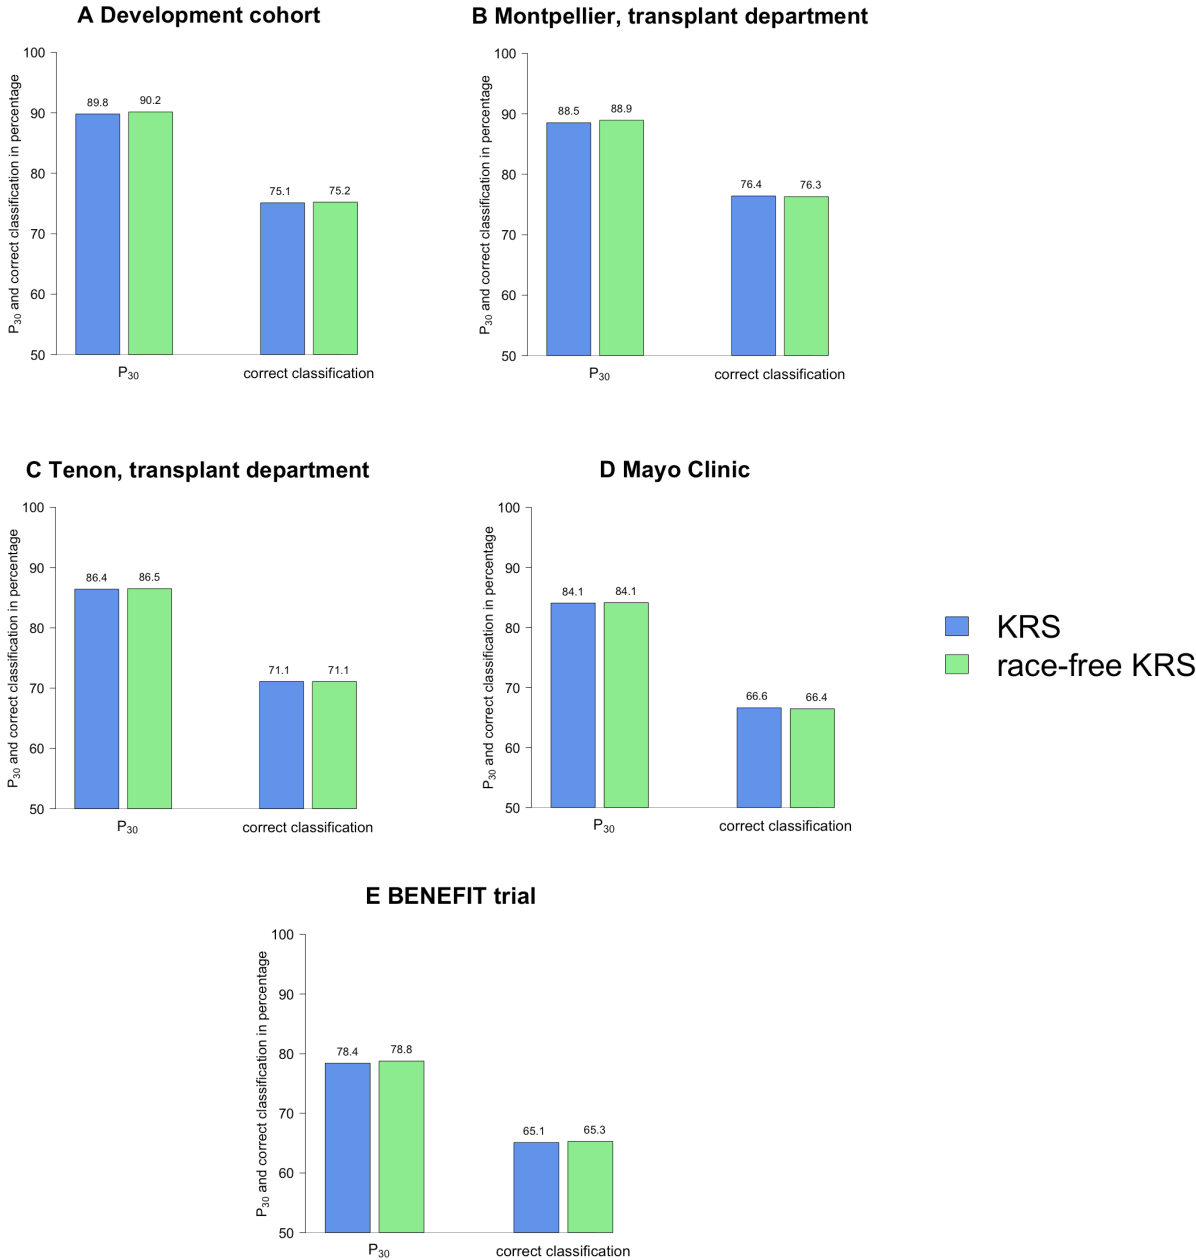



**Figure 4 – Performances of KRS GFR equation vs race-free KRS GFR equation : black patients**

The graphs show the P<sub>30</sub> and the correct classification metrics for the four GFR equations, in the development cohort, and in the external validation cohorts gathering : Montpellier, transplant department (panel A), Tenon, transplant department (B), and Mayo-Clinic, Rochester (D). eGFR was calculated with the kidney-recipients-specific (KRS) GFR equations, and the race-free KRS GFR equations on the basis of recipient creatinine, age, gender, and race (if required by the equation). The P<sub>30</sub> is the proportion of the eGFR within the 30% of the mGFR. The correct classification is the agreement between eGFR and mGFR according to the GFR stages. As the performances were very similar, we chose to adopt the race-free equation.

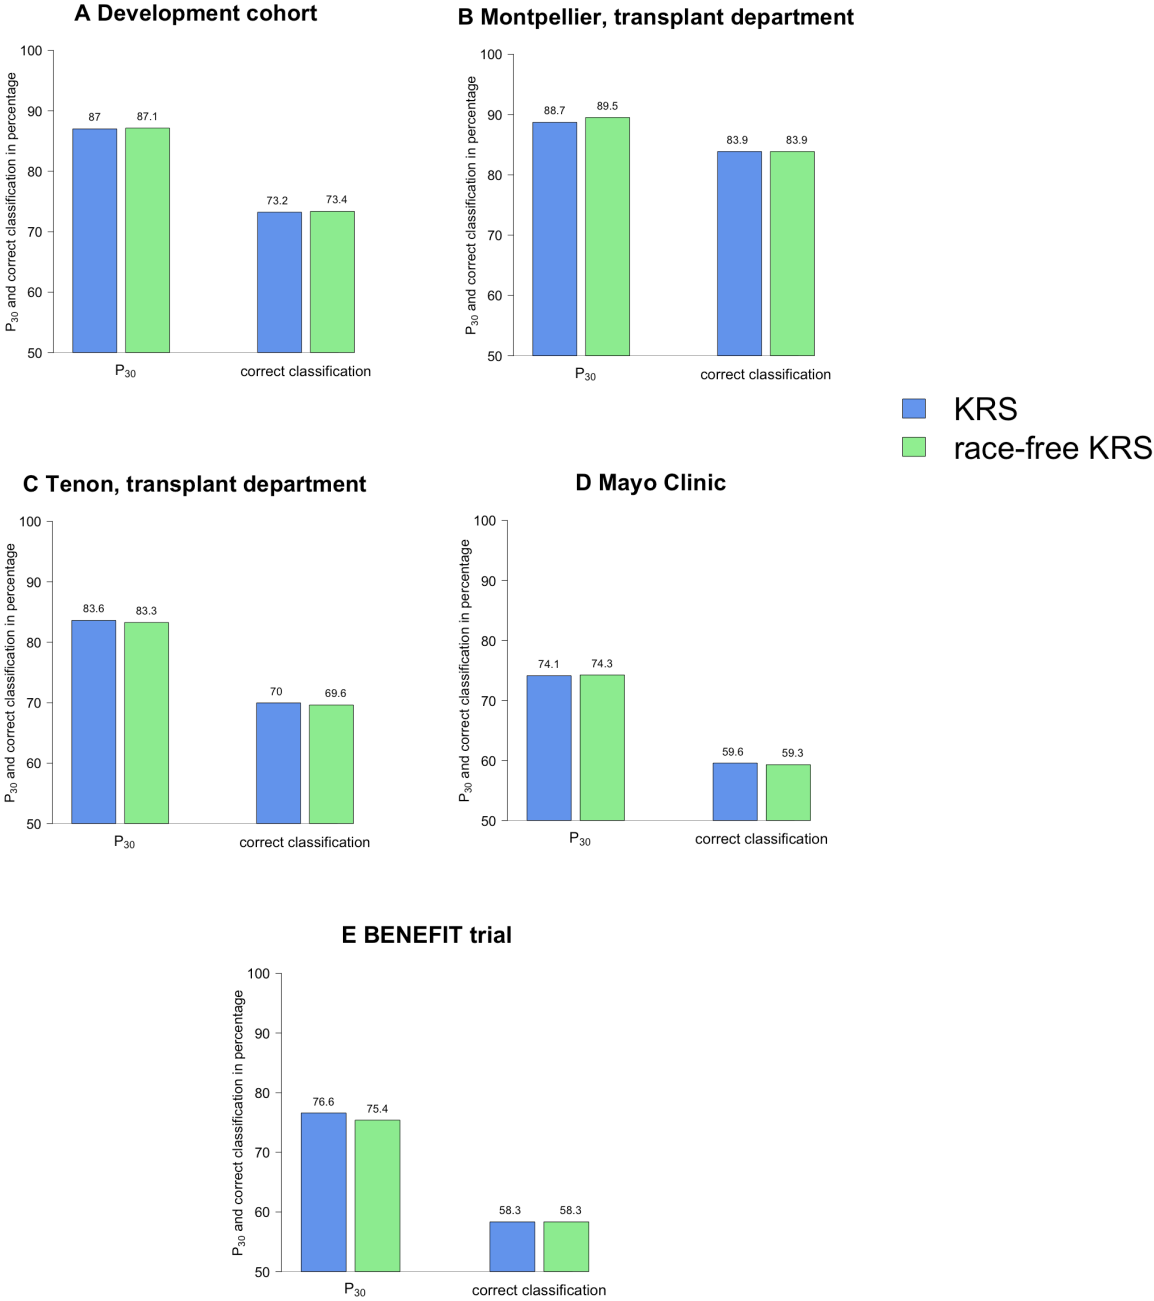

### Figure 5 – Performances of GFR equations in non-black patients

The  $P_{30}$  is the proportion of the eGFR within the 30% of the mGFR. The correct classification is the agreement between eGFR and mGFR according to the GFR stages.

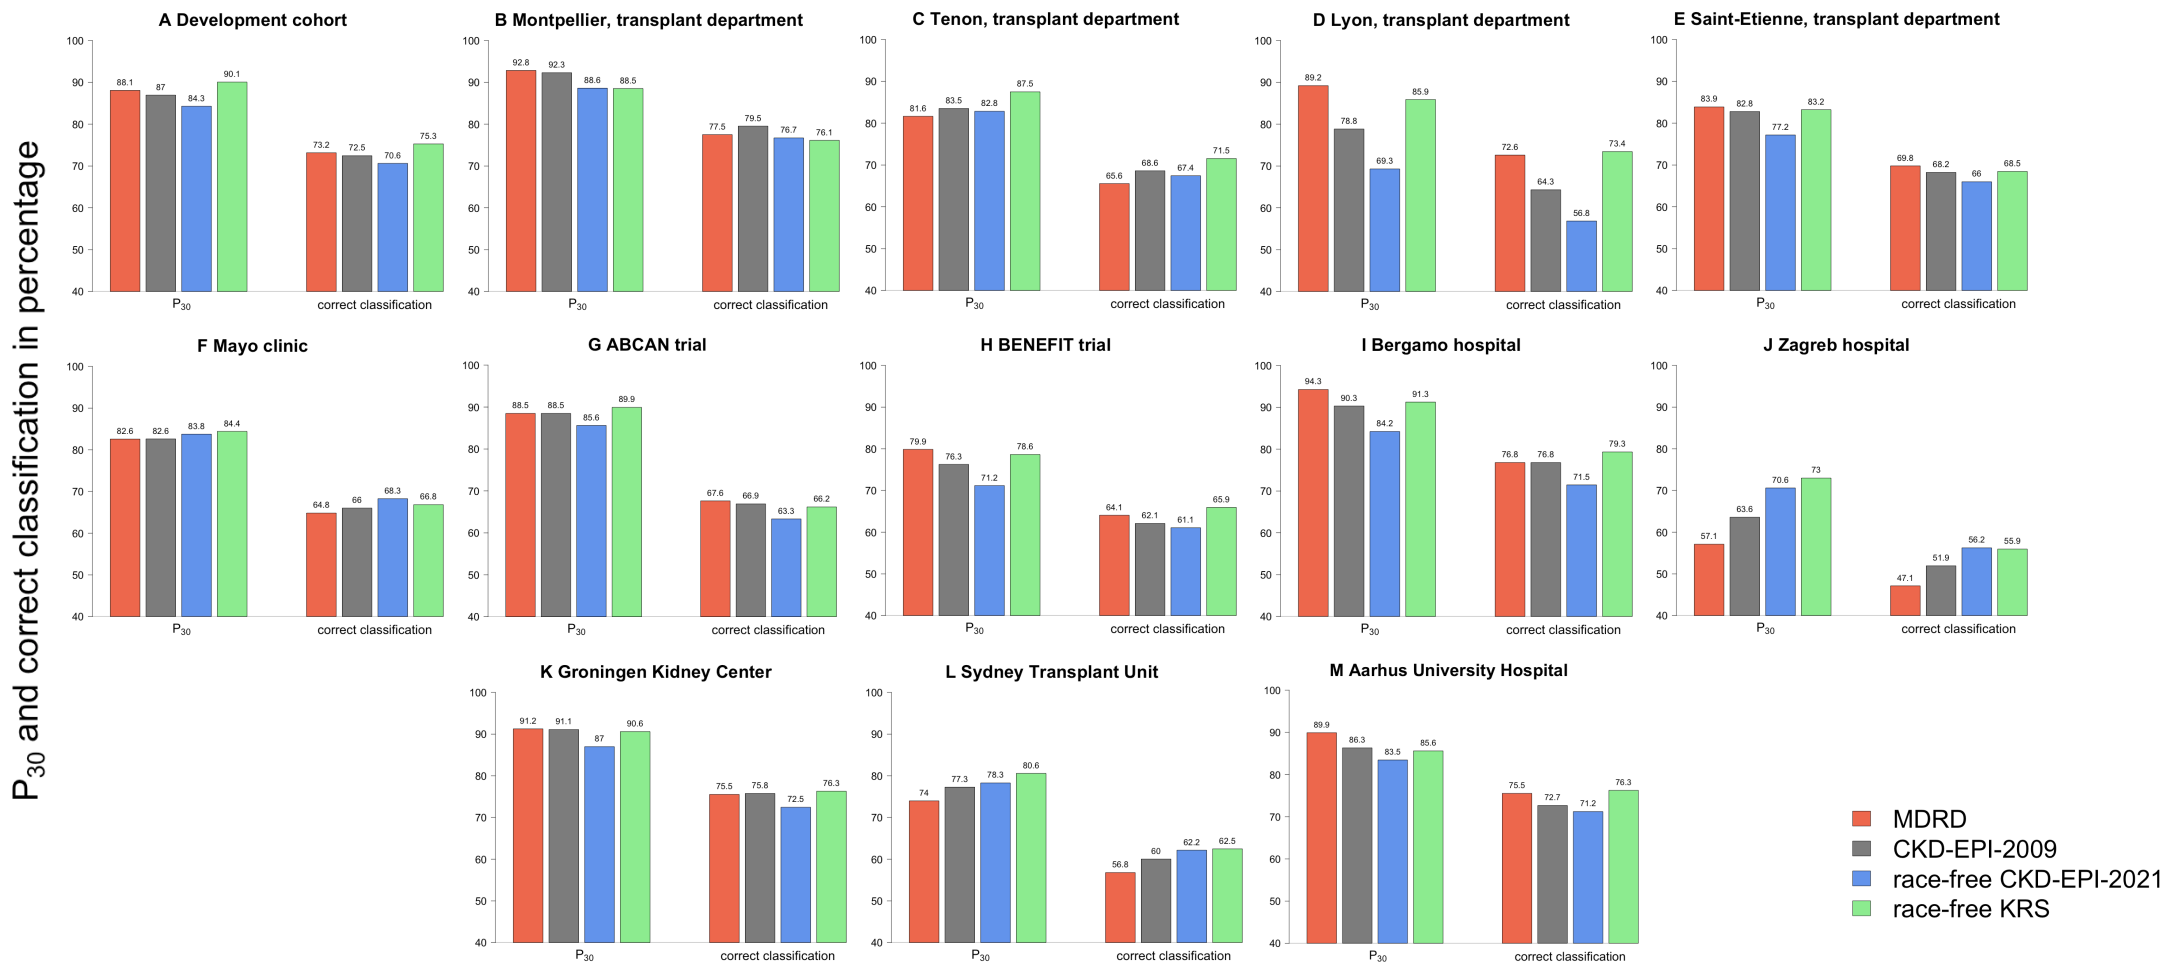

**Figure 6 – Performances of GFR equations in black patients**

The  $P_{30}$  is the proportion of the eGFR within the 30% of the mGFR. The correct classification is the agreement between eGFR and mGFR according to the GFR stages.

P<sub>30</sub> and correct classification in percentage

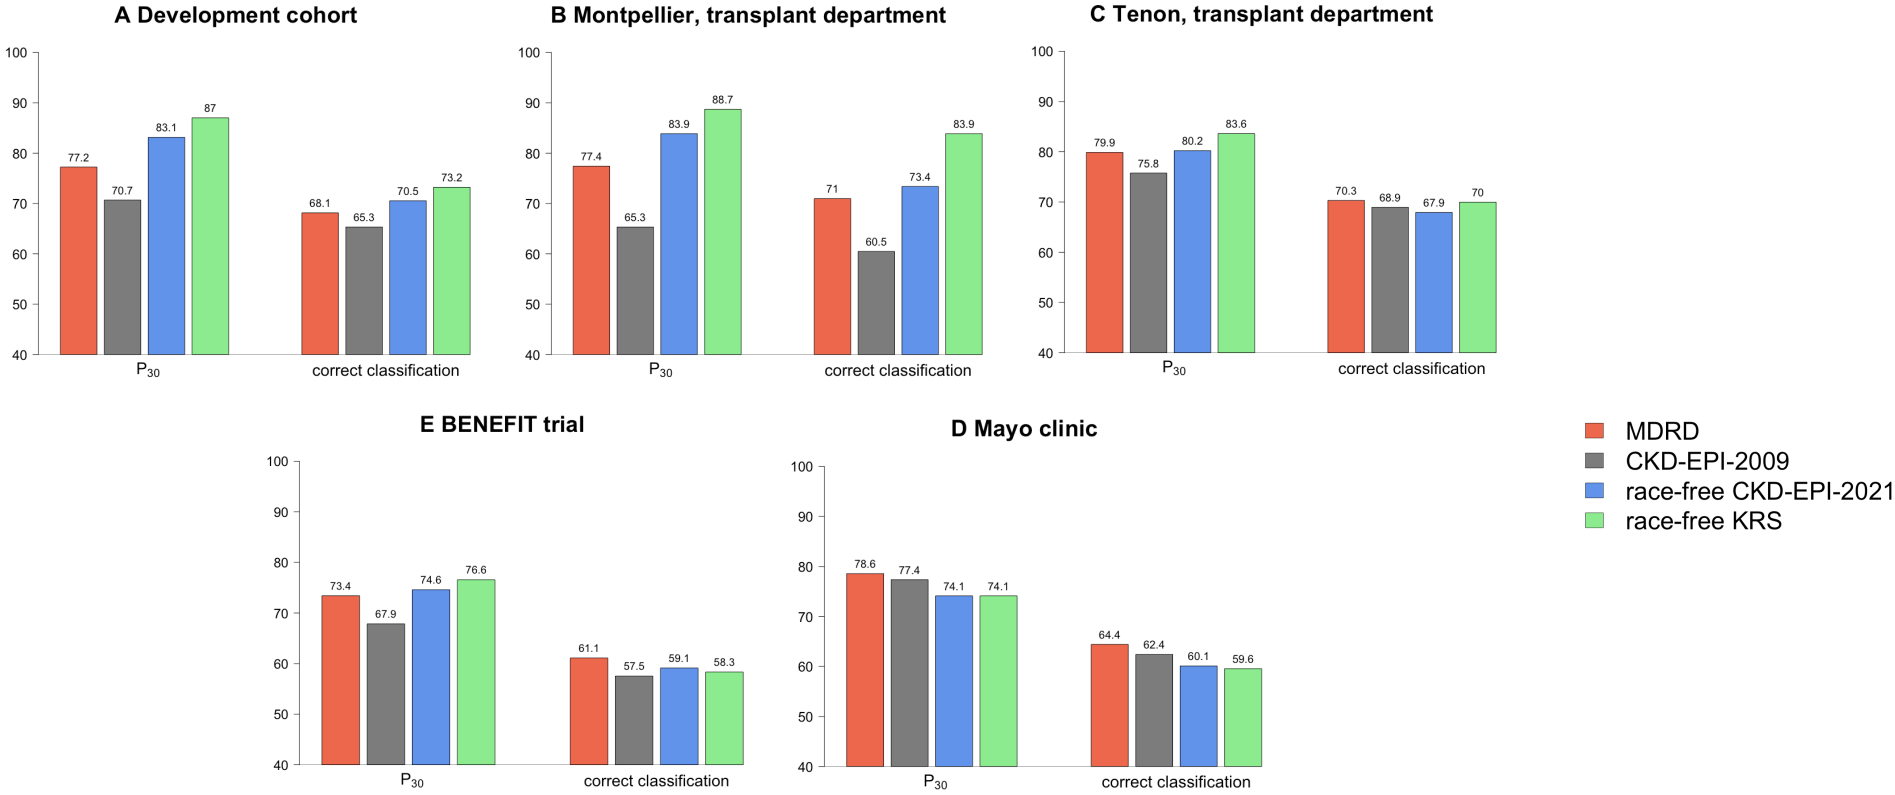

### Figure 7 – Performances of GFR equations in additional races

The P<sub>30</sub> is the proportion of the eGFR within the 30% of the mGFR. The correct classification is the agreement between eGFR and mGFR according to the GFR stages. Because of the lower number of arab, asian, indian and hispanic patients in the French cohorts and the Mayo clinic center, we decided to merge the datasets together and present the performances accordingly.

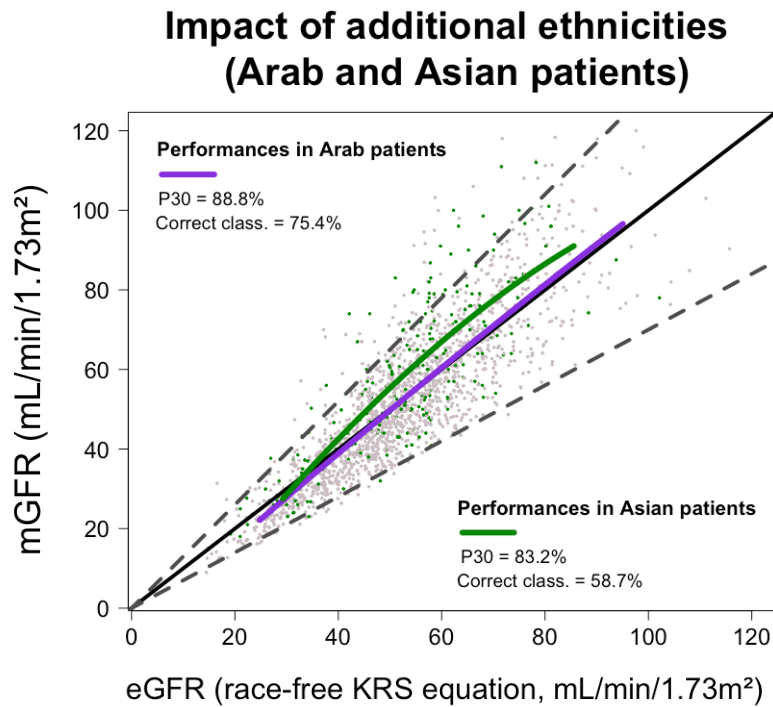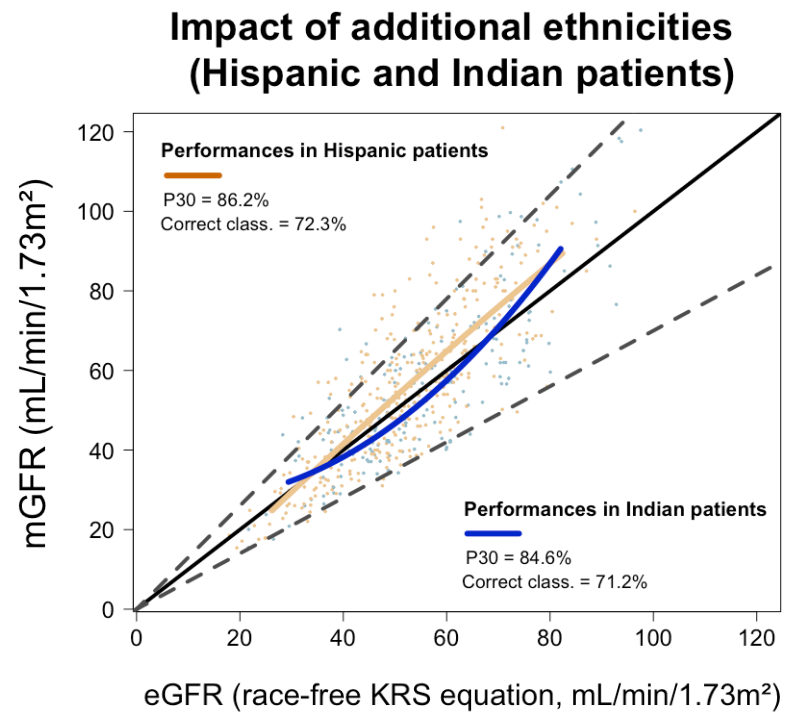

**Figure 8 – Performances of GFR equations : Bland-Altman plot**  
A LOESS regression was performed to estimate the overall trend for each cohort.

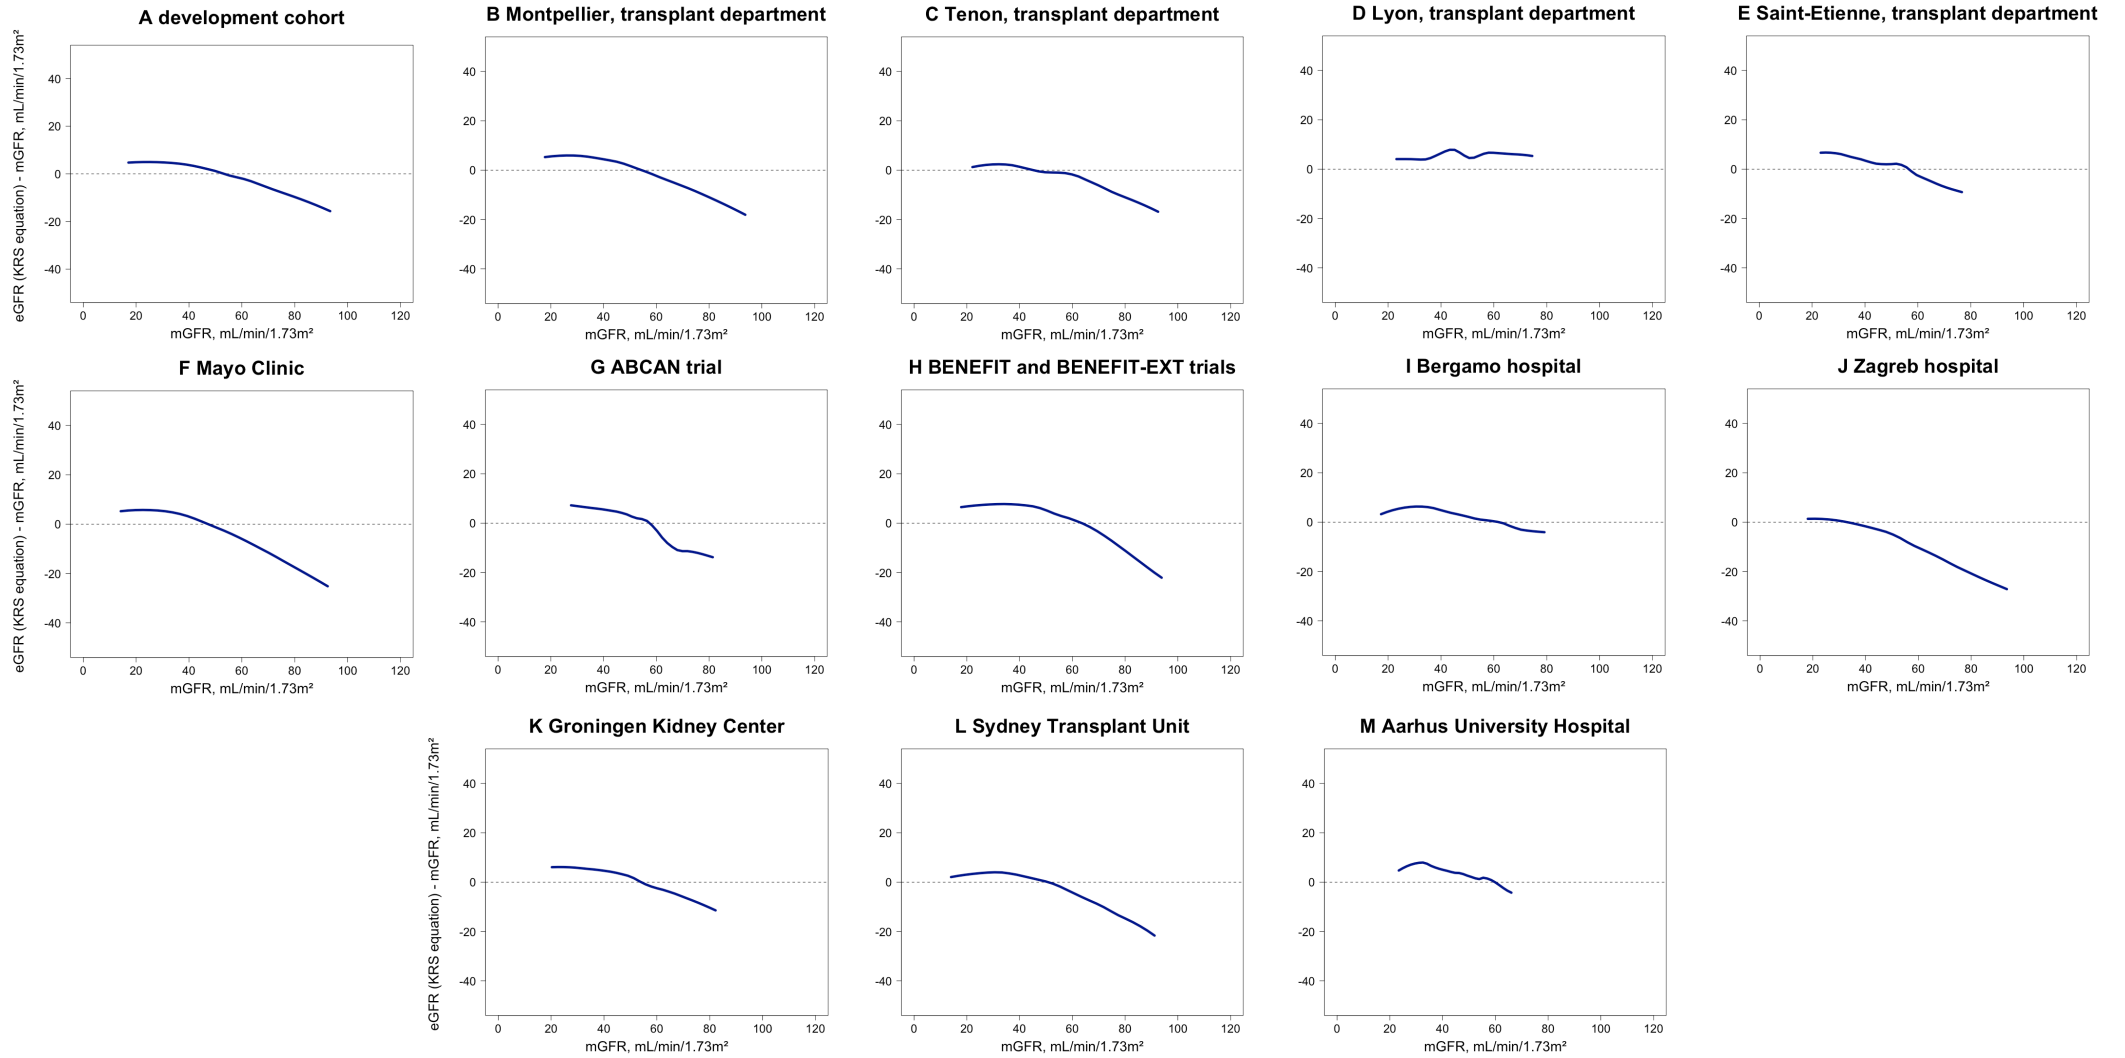

### Figure 9 – Performances of GFR equations in male patients

The P<sub>30</sub> is the proportion of the eGFR within the 30% of the mGFR. The correct classification is the agreement between eGFR and mGFR according to the GFR stages.

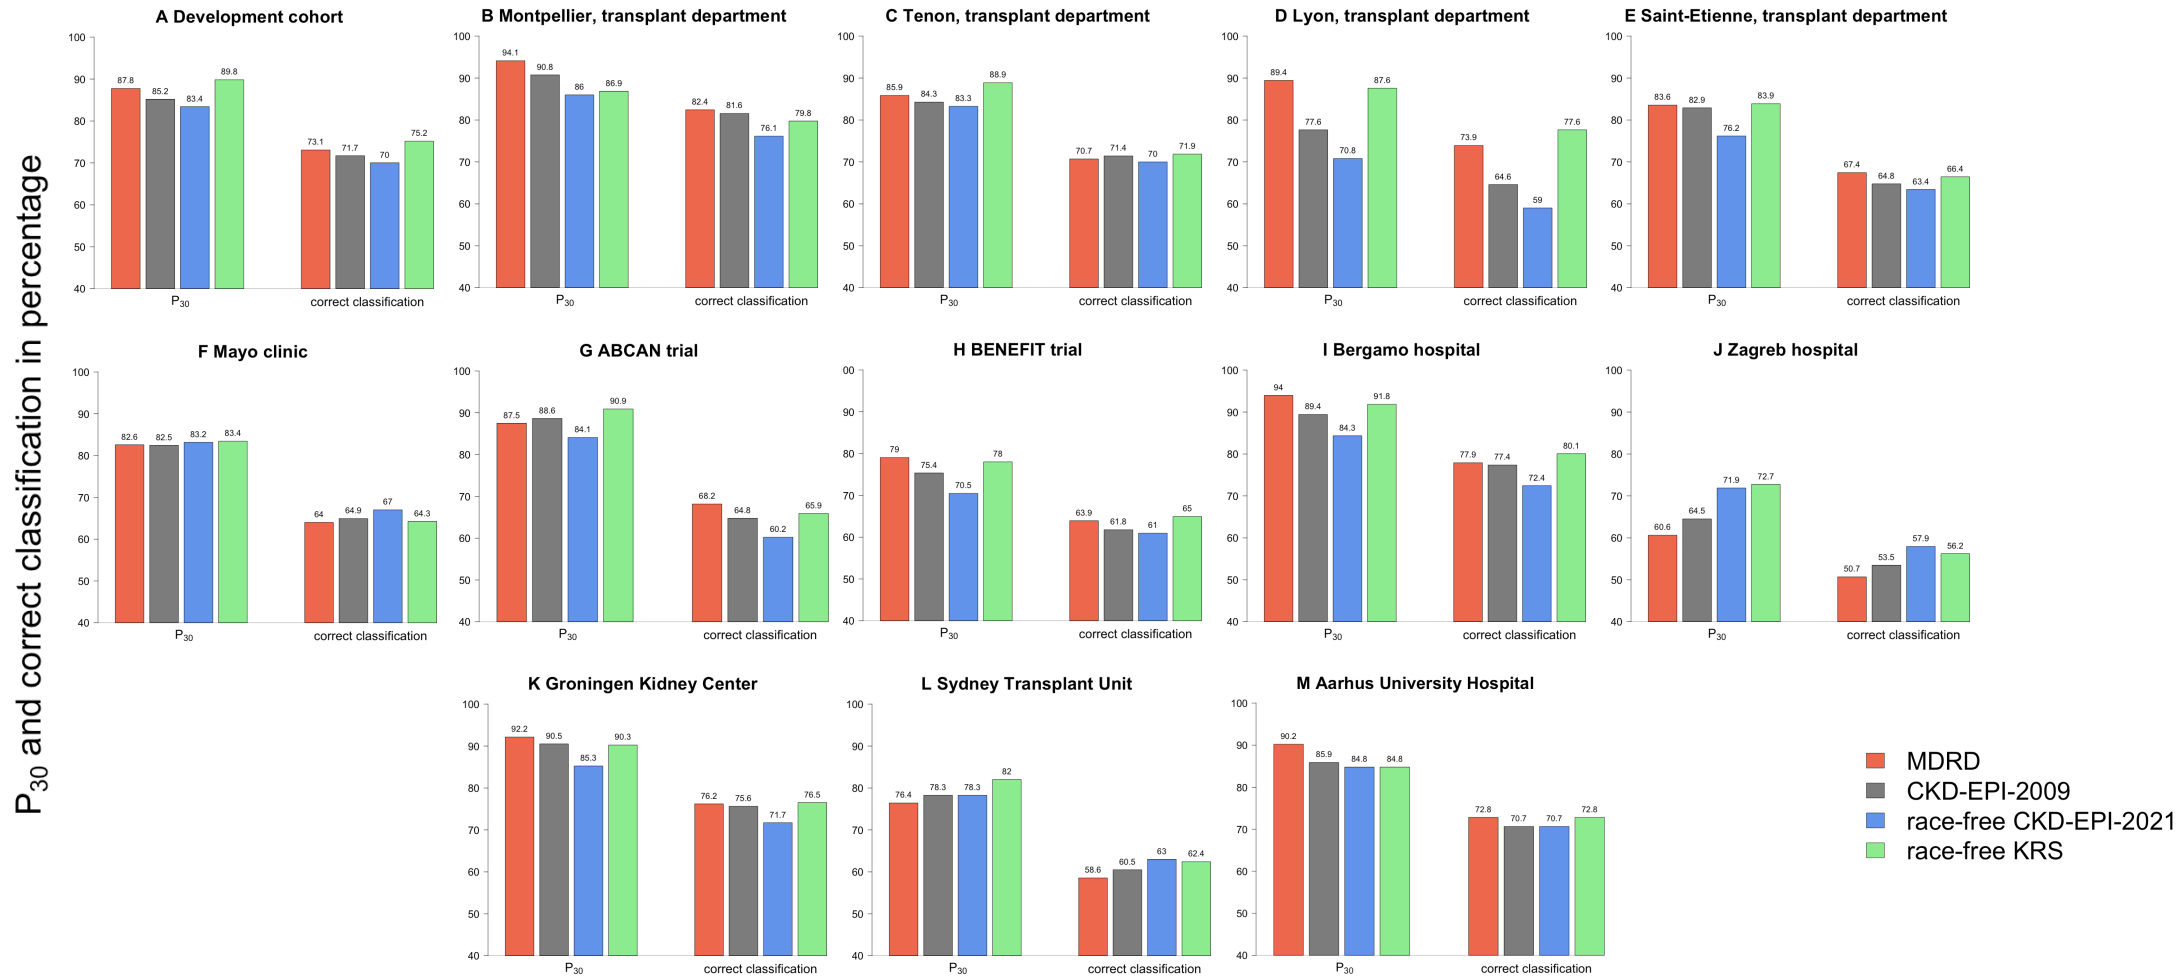

### Figure 10 – Performances of GFR equations in female patients

The  $P_{30}$  is the proportion of the eGFR within the 30% of the mGFR. The correct classification is the agreement between eGFR and mGFR according to the GFR stages.

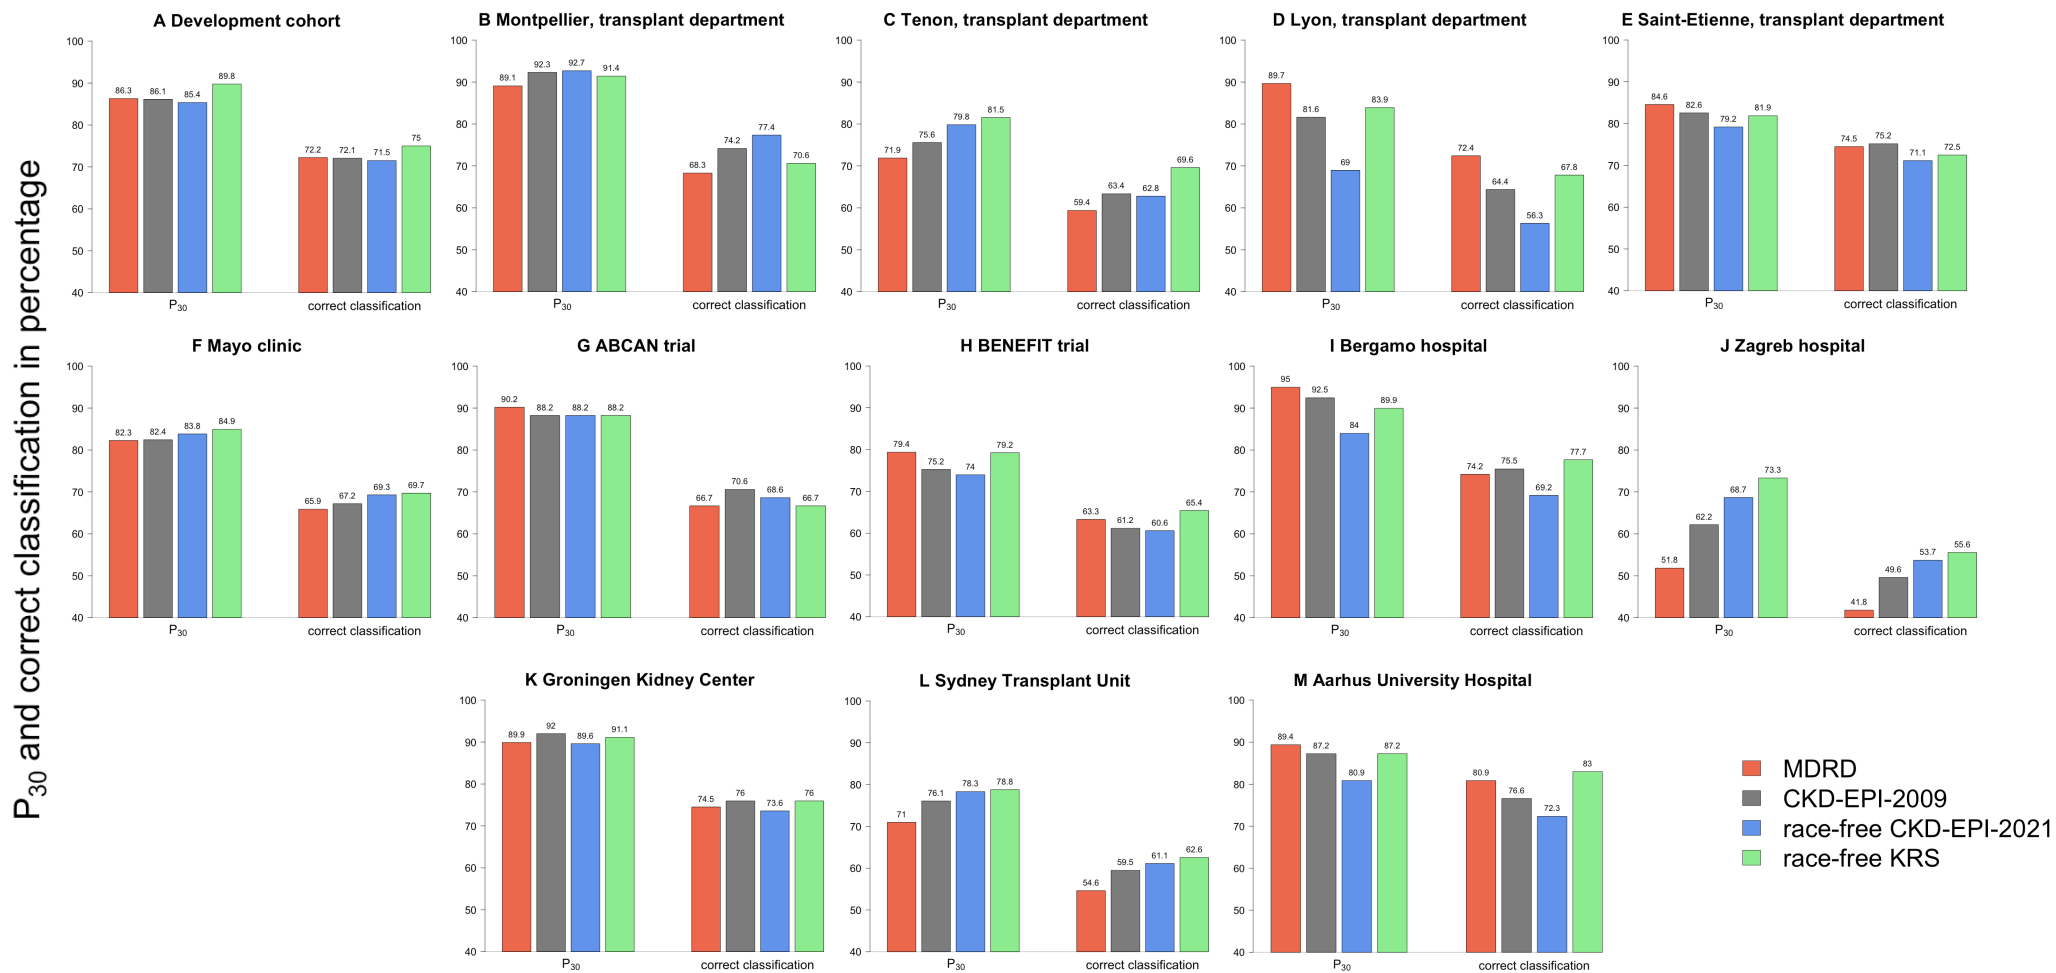

### Figure 11 – Performances of GFR equations in older patients

The P<sub>30</sub> is the proportion of the eGFR within the 30% of the mGFR. The correct classification is the agreement between eGFR and mGFR according to the GFR stages.

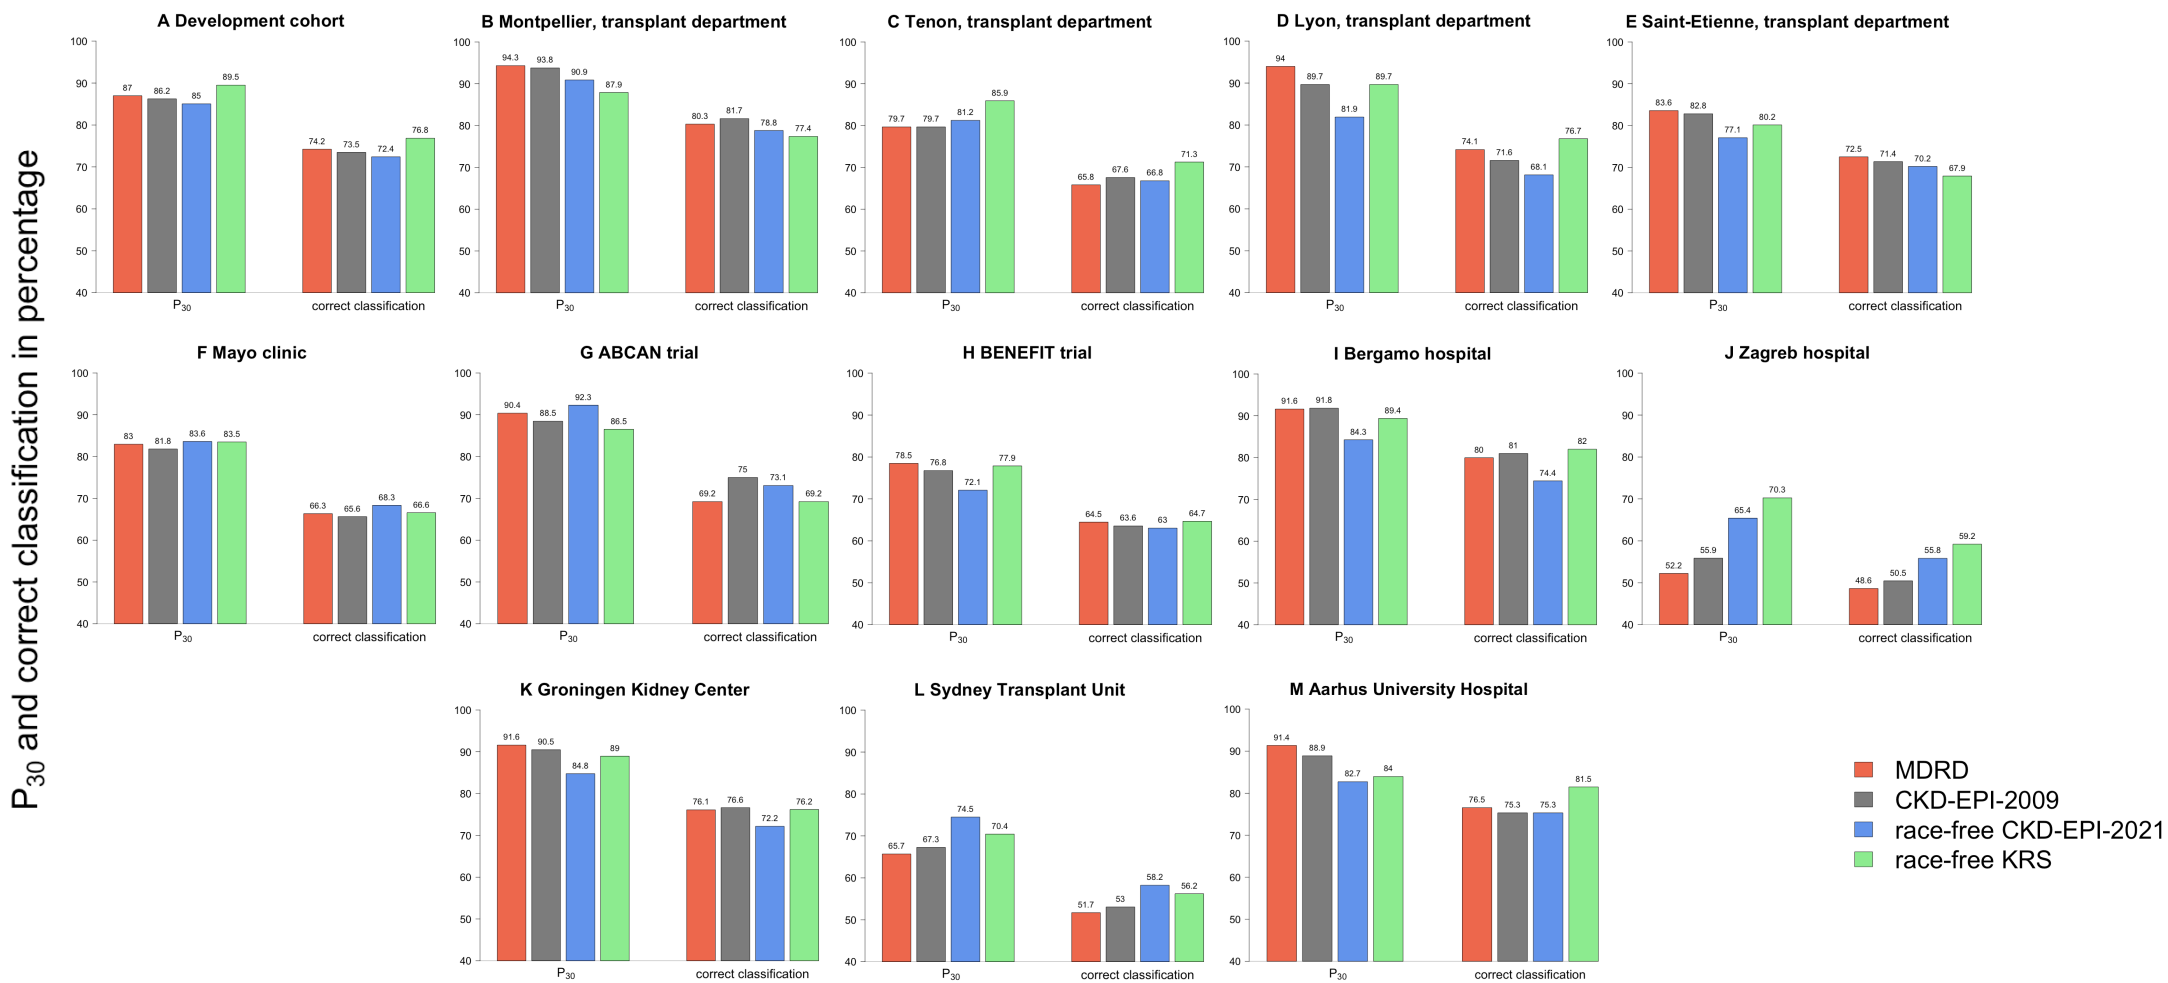



**Figure 12 – Performances of GFR equations in younger patients**

The  $P_{30}$  is the proportion of the eGFR within the 30% of the mGFR. The correct classification is the agreement between eGFR and mGFR according to the GFR stages.

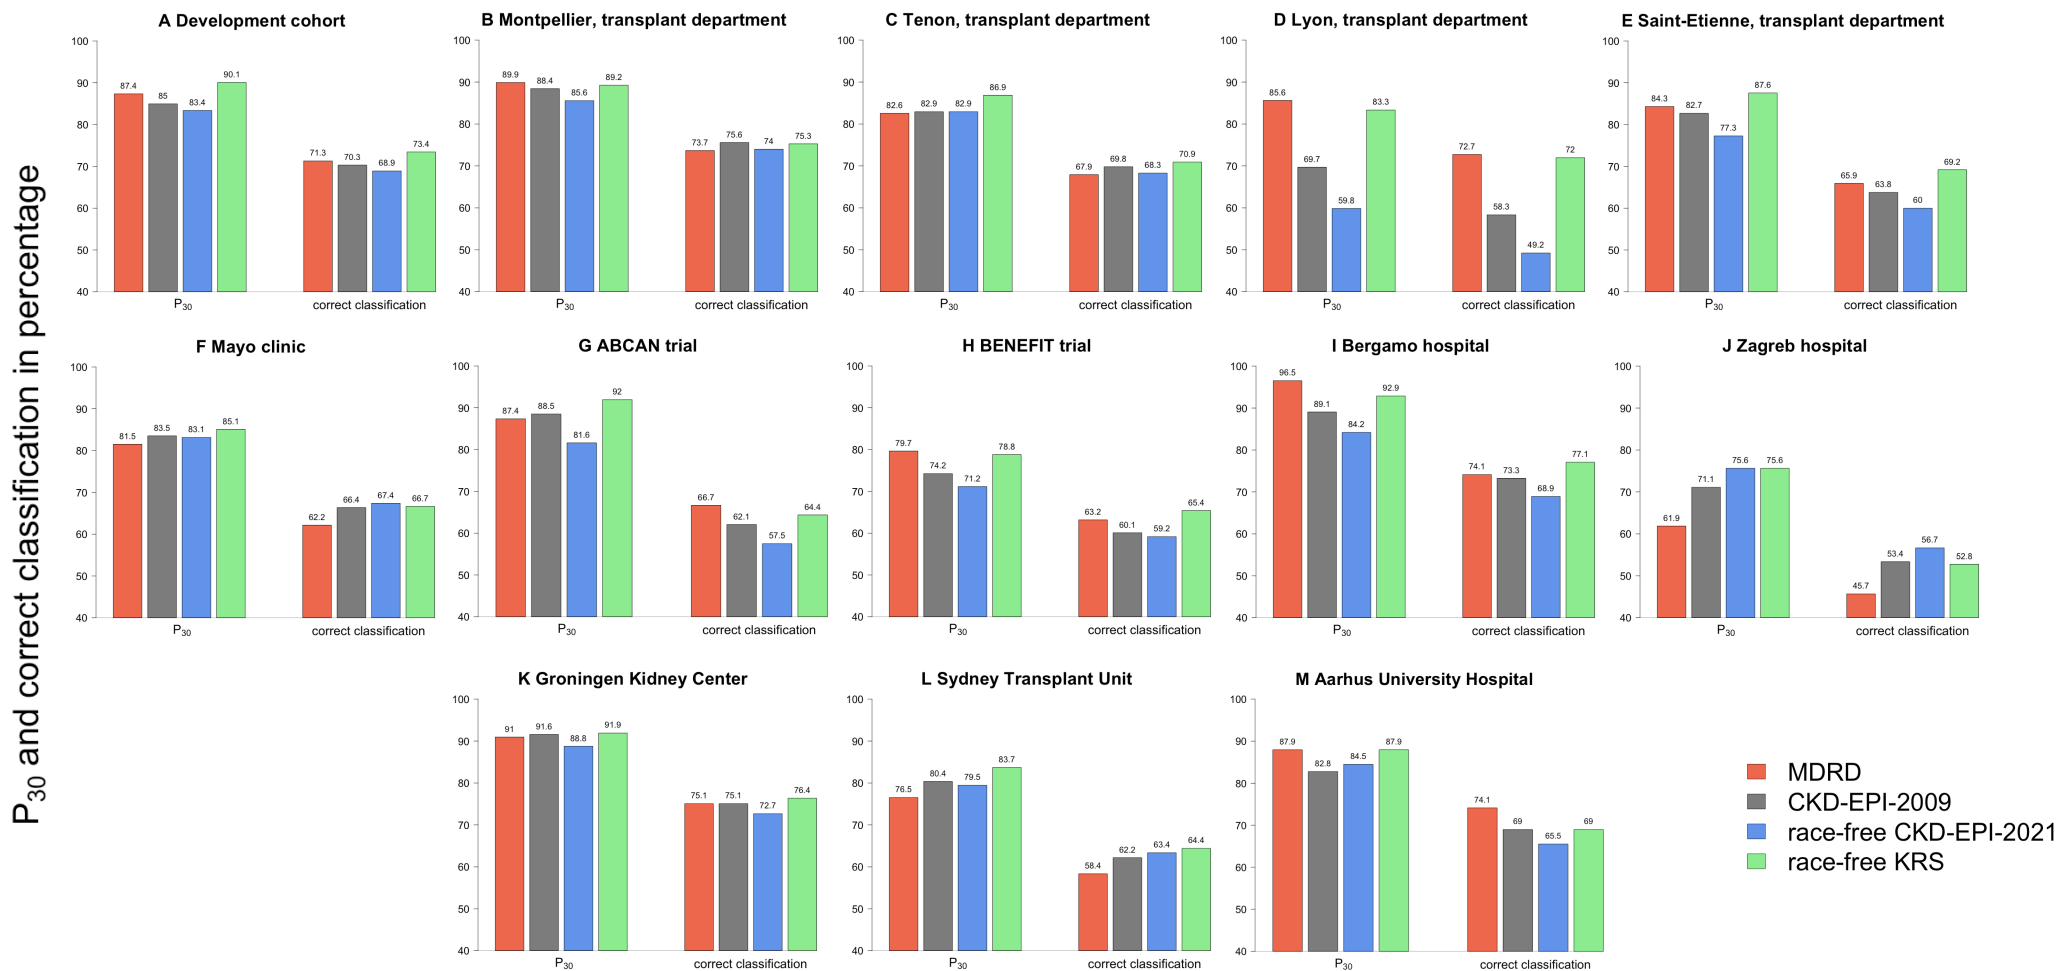

### Figure 13 – Performances of GFR equations in underweight patients

The P<sub>30</sub> is the proportion of the eGFR within the 30% of the mGFR. The correct classification is the agreement between eGFR and mGFR according to the GFR stages. The Aarhus University Hospital only contained two underweight patients and was therefore not plotted in this graph.

P<sub>30</sub> and correct classification in percentage

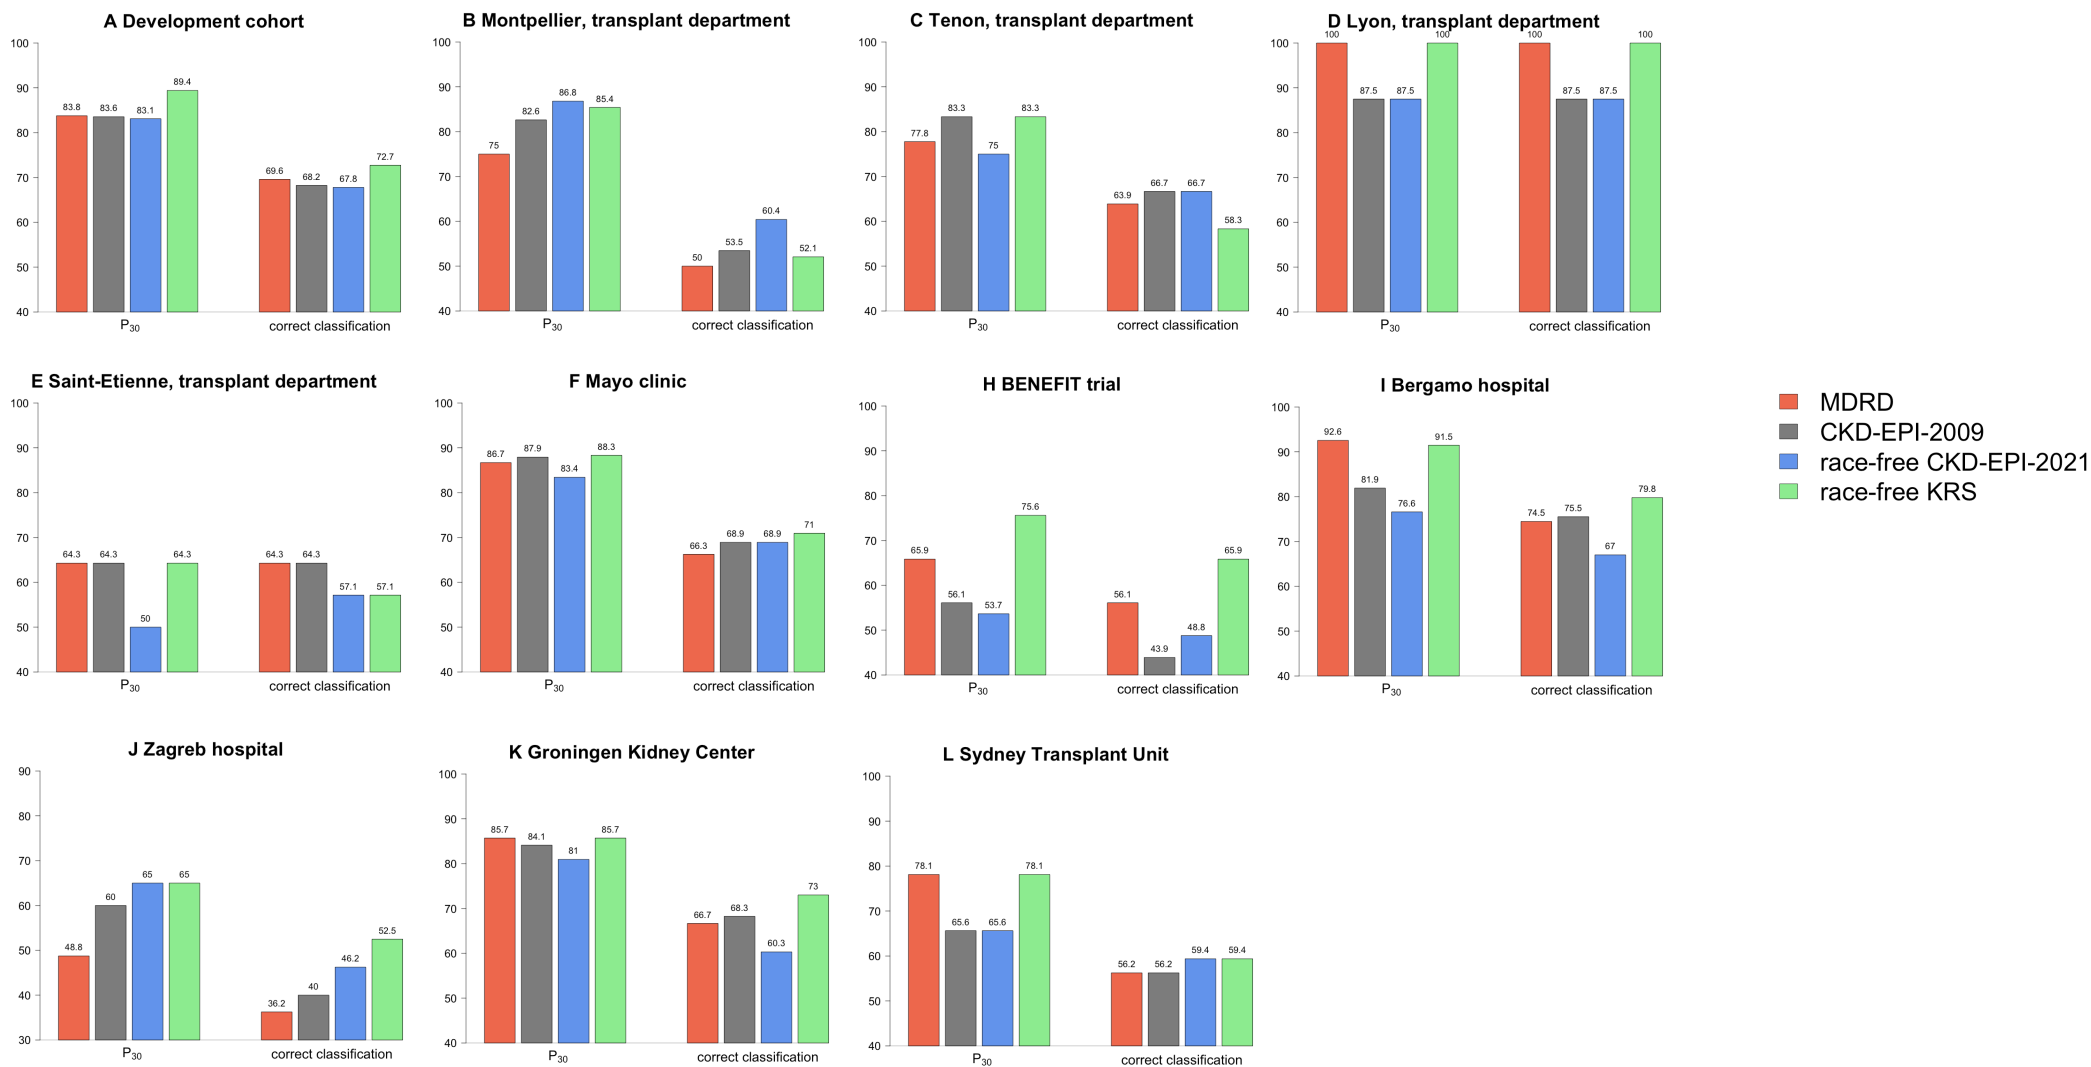

**Figure 14 – Performances of GFR equations in normal weight patients**

The  $P_{30}$  is the proportion of the eGFR within the 30% of the mGFR. The correct classification is the agreement between eGFR and mGFR according to the GFR stages.

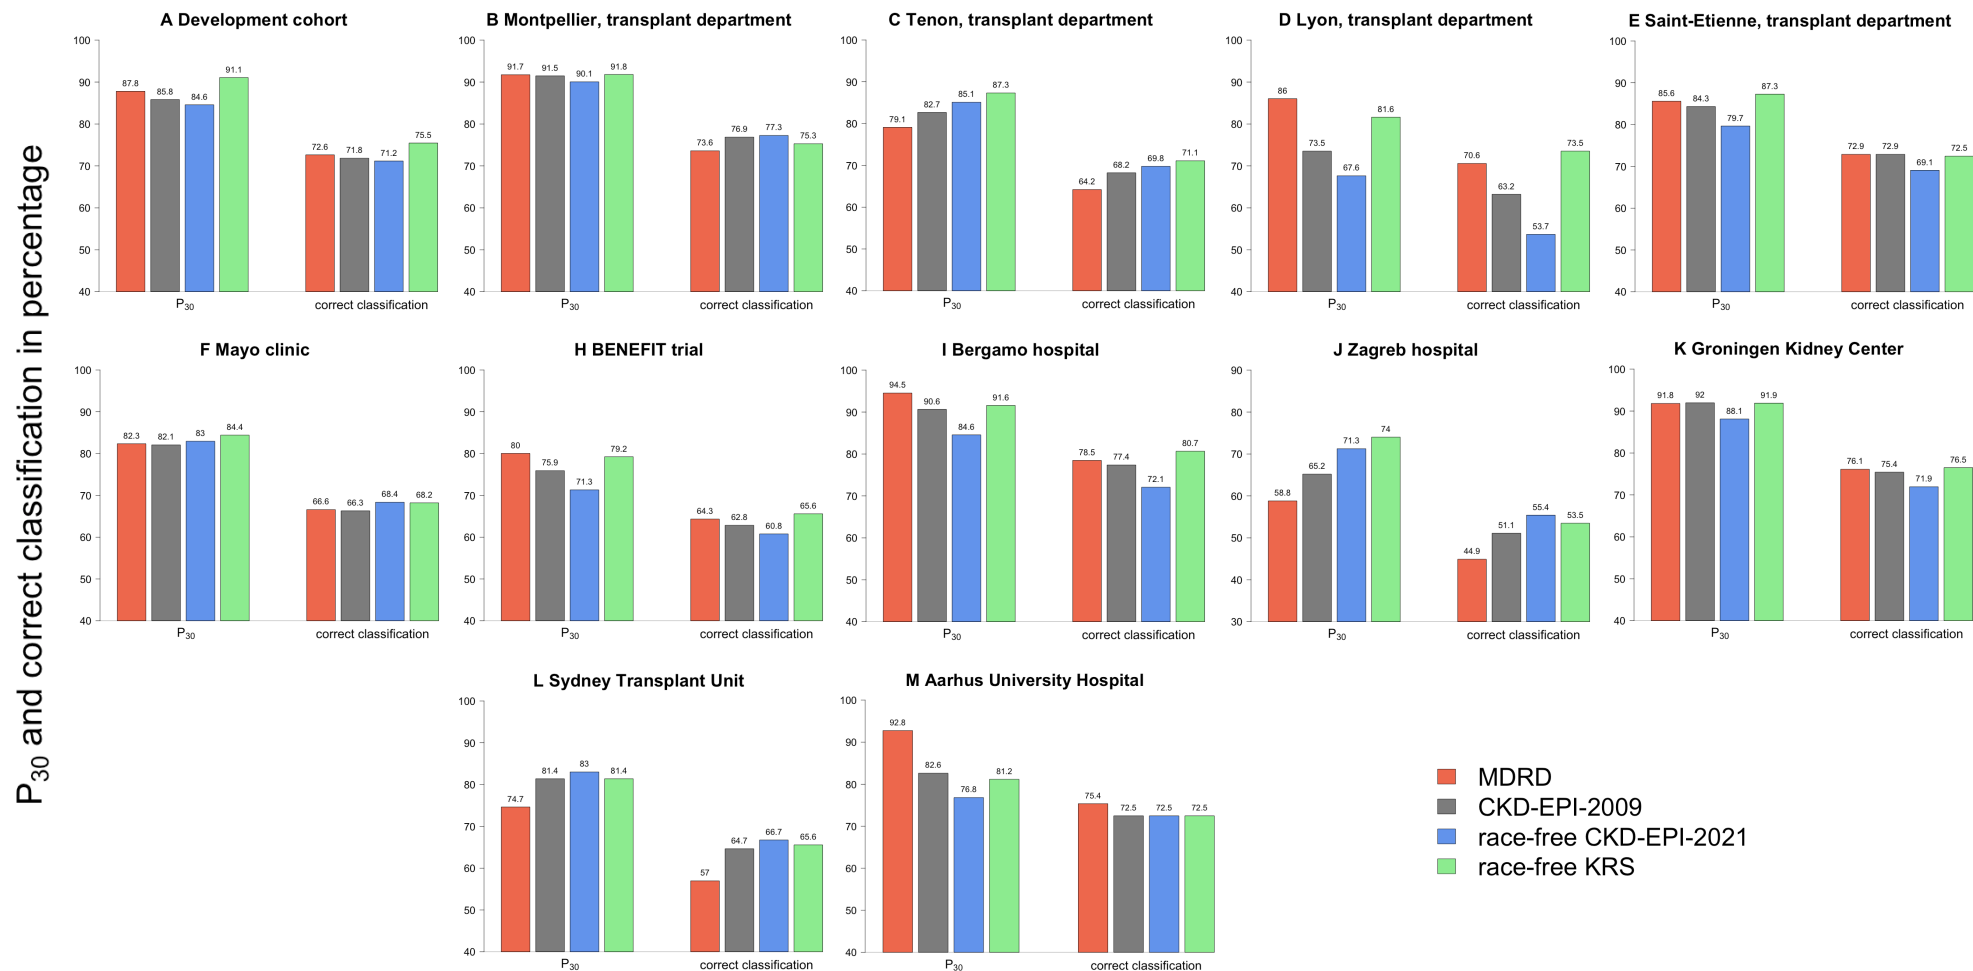

### Figure 15 – Performances of GFR equations in overweight patients

The  $P_{30}$  is the proportion of the eGFR within the 30% of the mGFR. The correct classification is the agreement between eGFR and mGFR according to the GFR stages.

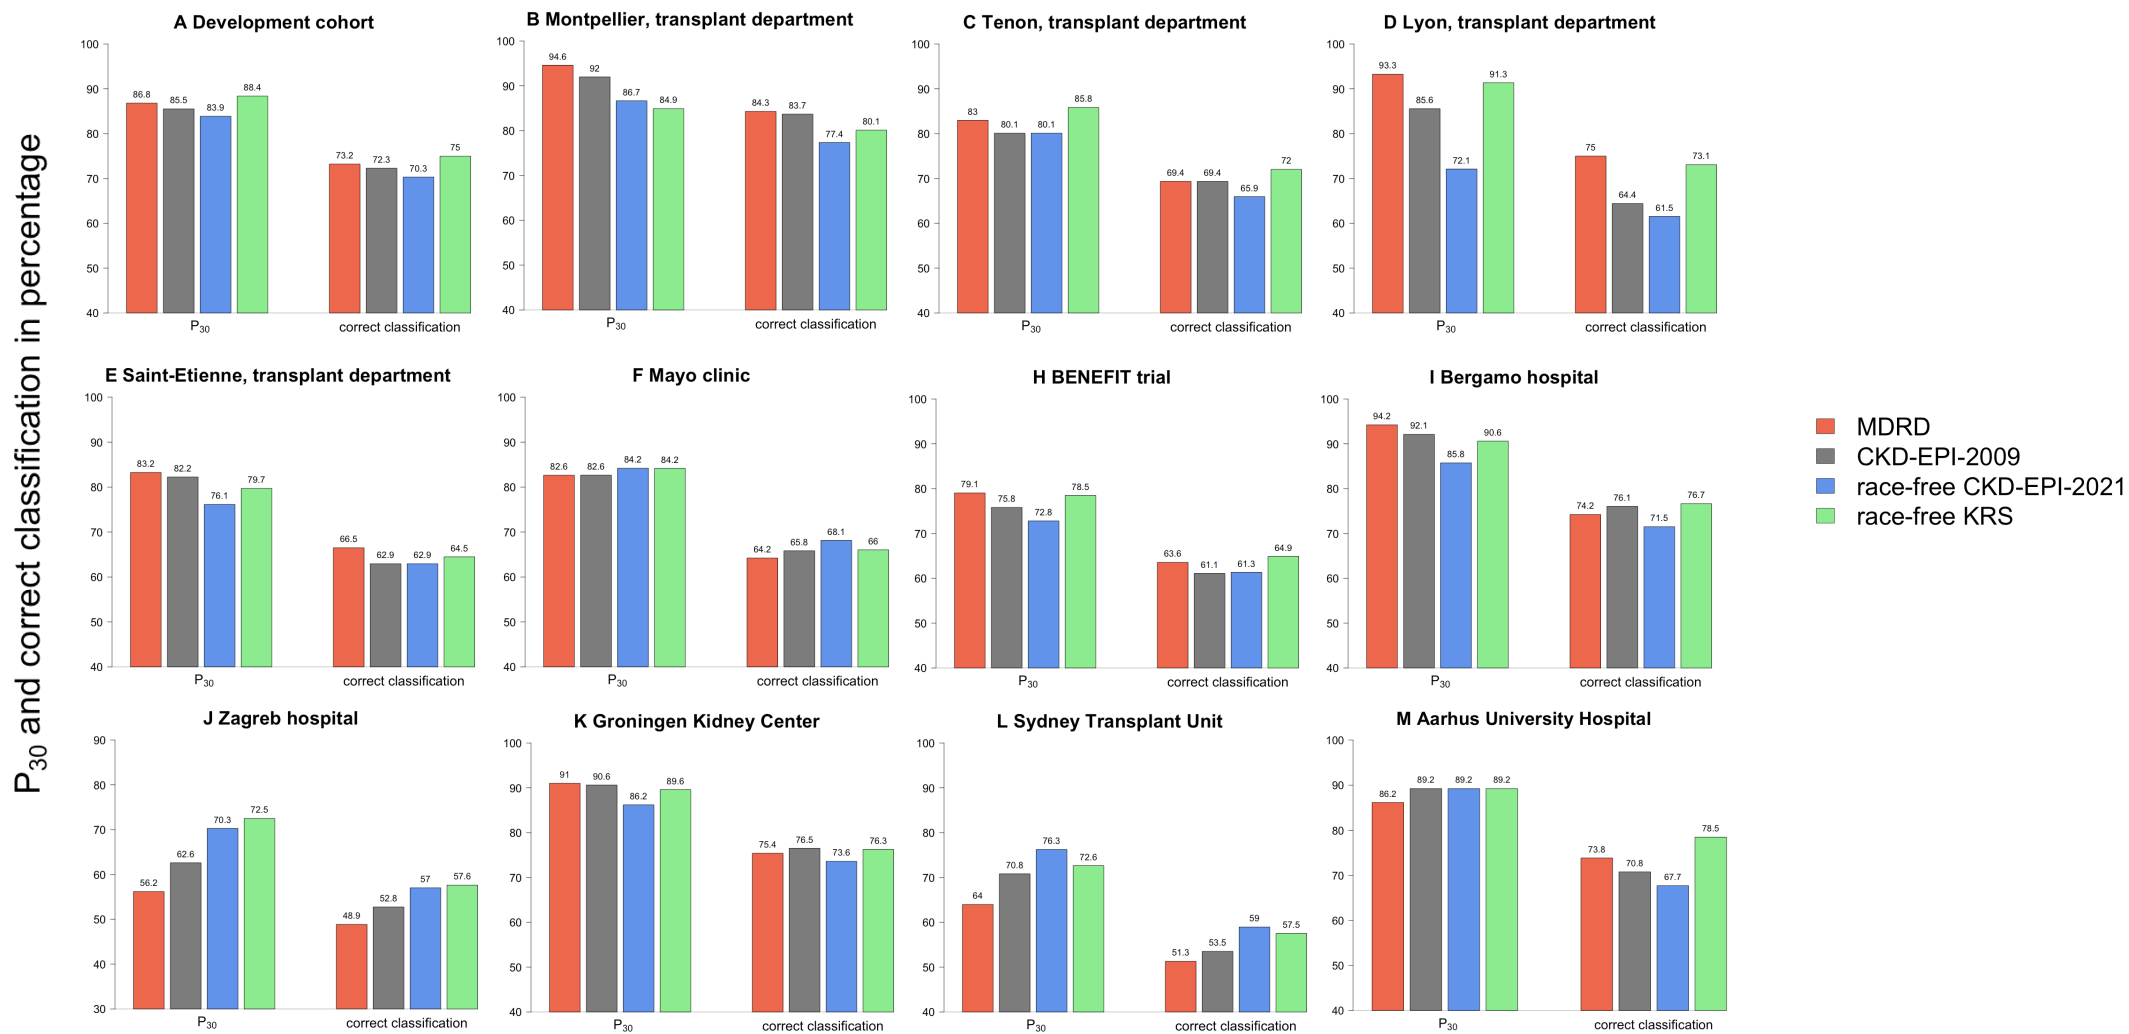

### Figure 16 – Performances of GFR equations in obese patients

The P<sub>30</sub> is the proportion of the eGFR within the 30% of the mGFR. The correct classification is the agreement between eGFR and mGFR according to the GFR stages.

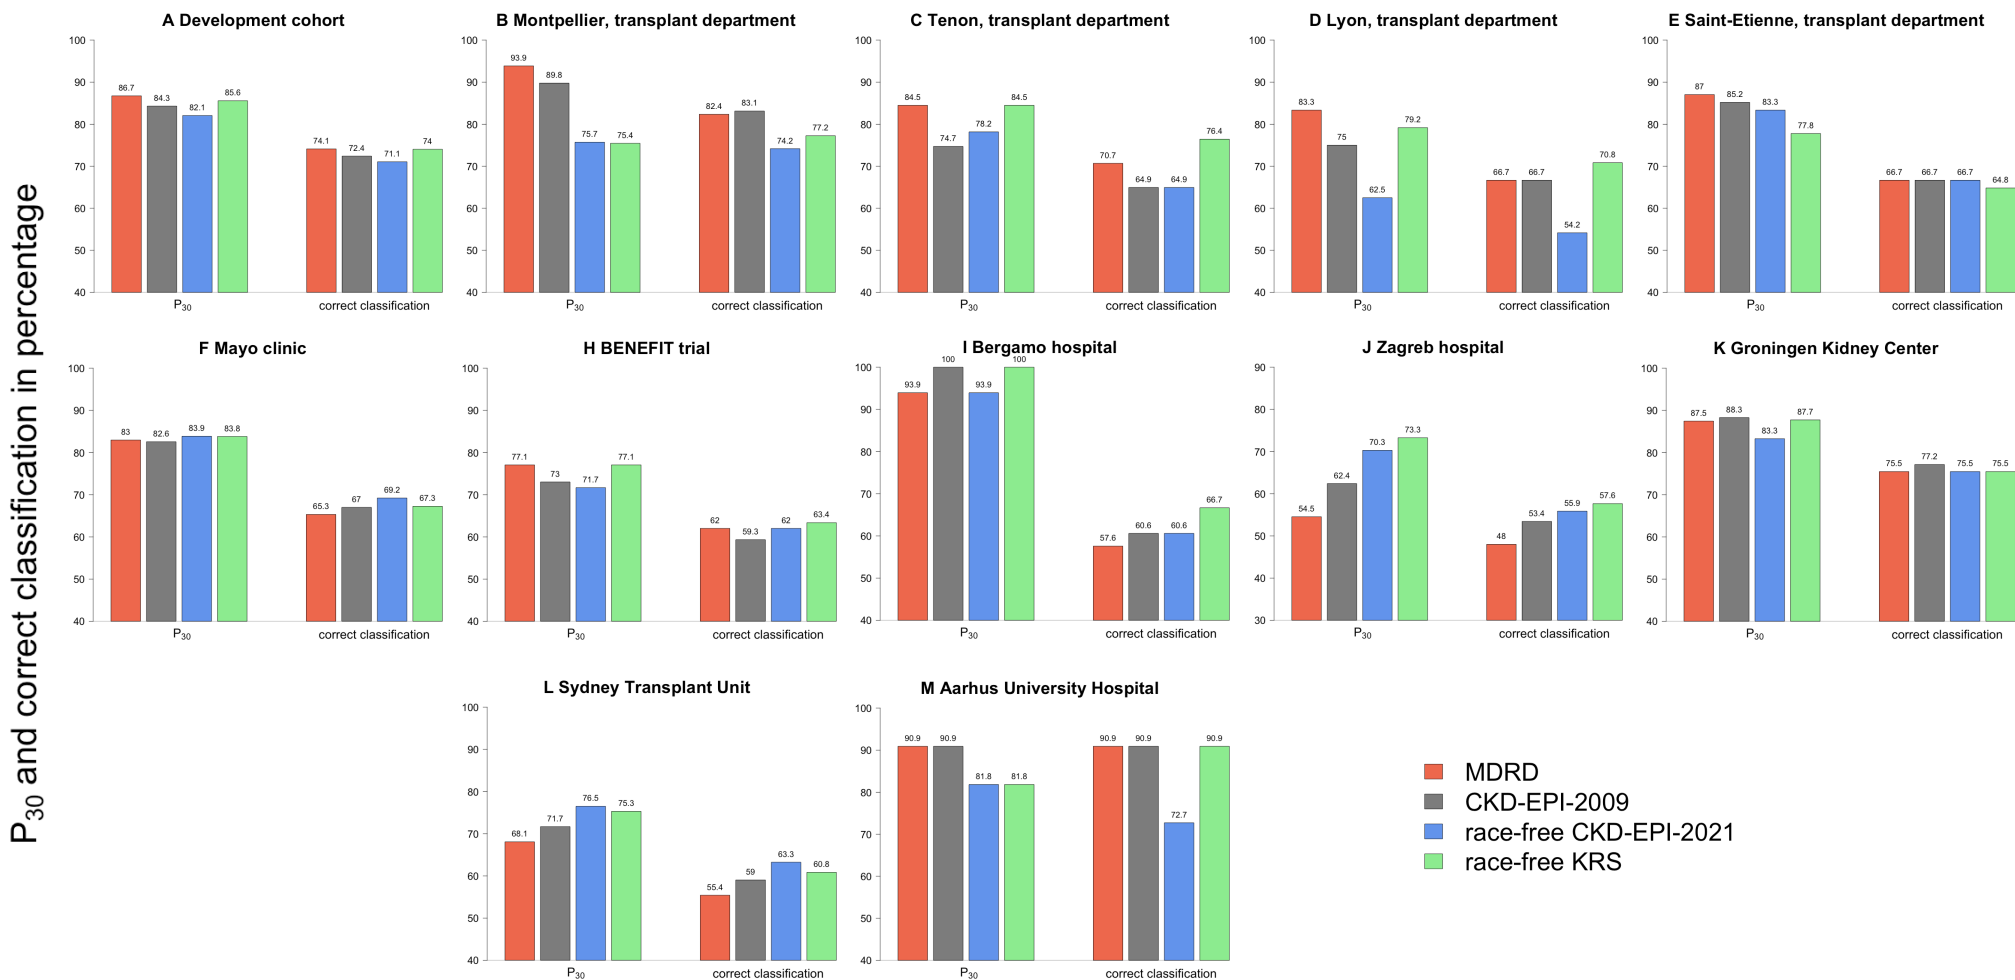

### Figure 17 – Performances of GFR equations in creatinine measured with enzymatic method

The P<sub>30</sub> is the proportion of the eGFR within the 30% of the mGFR. The correct classification is the agreement between eGFR and mGFR according to the GFR stages.

P<sub>30</sub> and correct classification in percentage

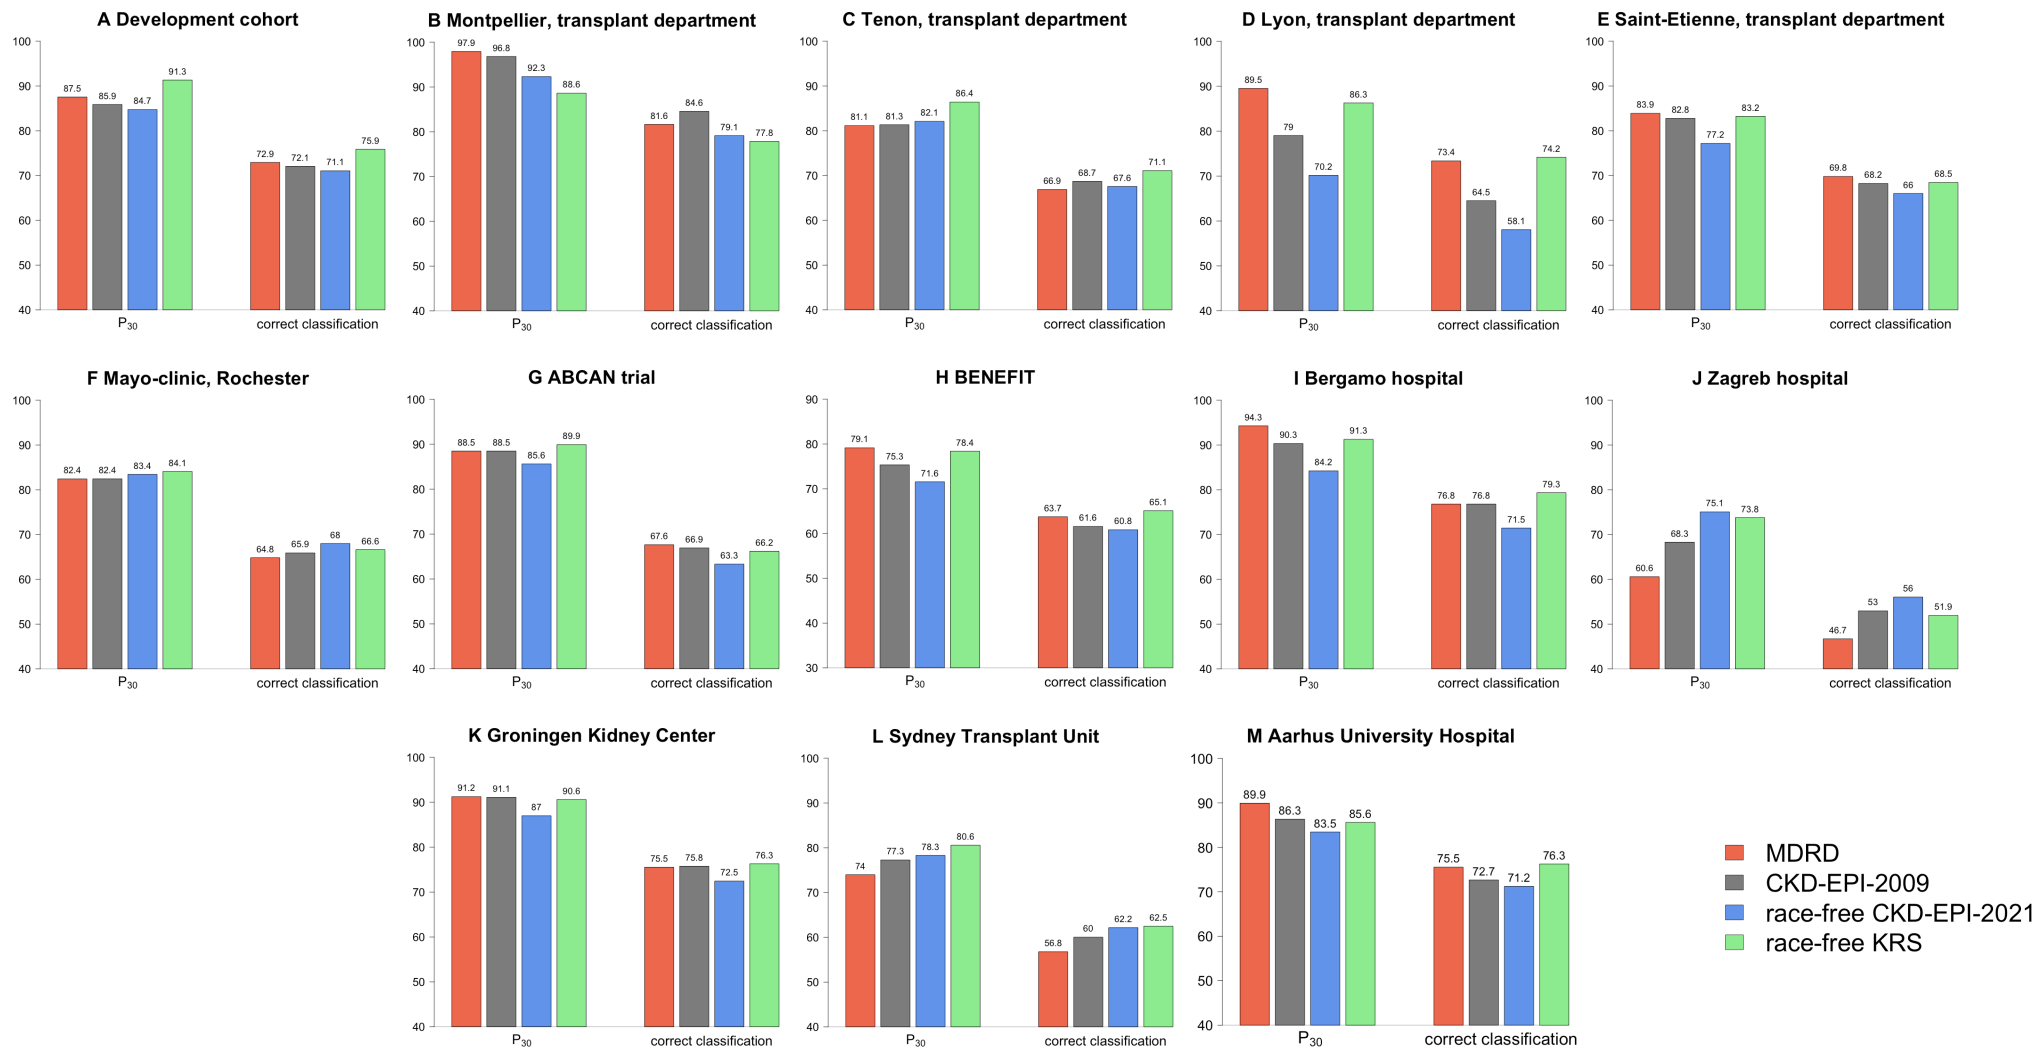

**Figure 18 – Performances of GFR equations in patients whose creatinine was measured with colorimetric method**

The  $P_{30}$  is the proportion of the eGFR within the 30% of the mGFR. The correct classification is the agreement between eGFR and mGFR according to the GFR stages.

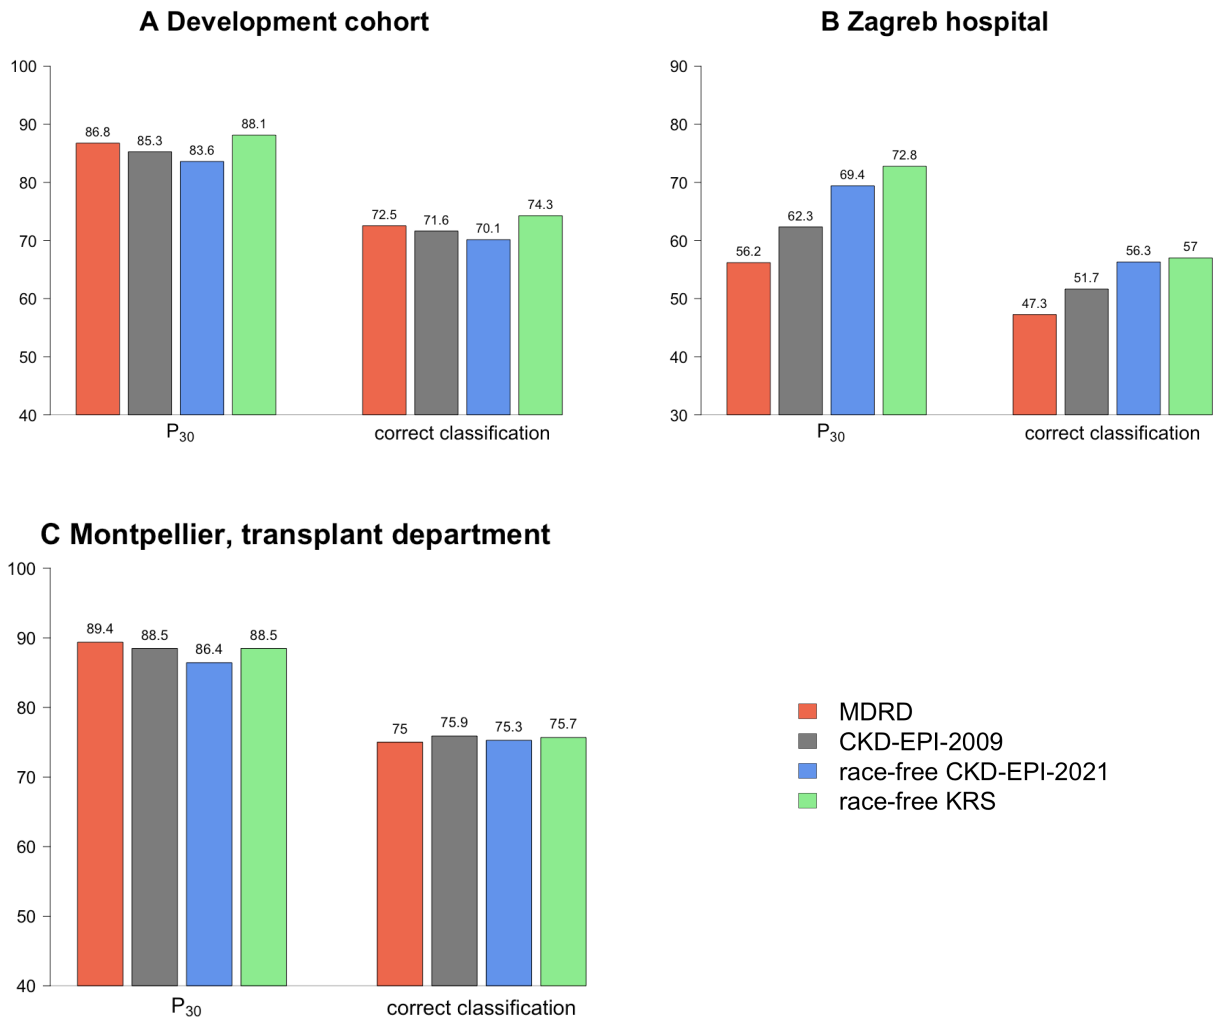

**Figure 19 – Performances of GFR equations in patients whose GFR was measured with the <sup>99</sup>Tc-DTPA clearance**

The P<sub>30</sub> is the proportion of eGFR in a 30% confidence interval of the mGFR. The correct classification is the agreement between eGFR and mGFR according to the GFR stages.

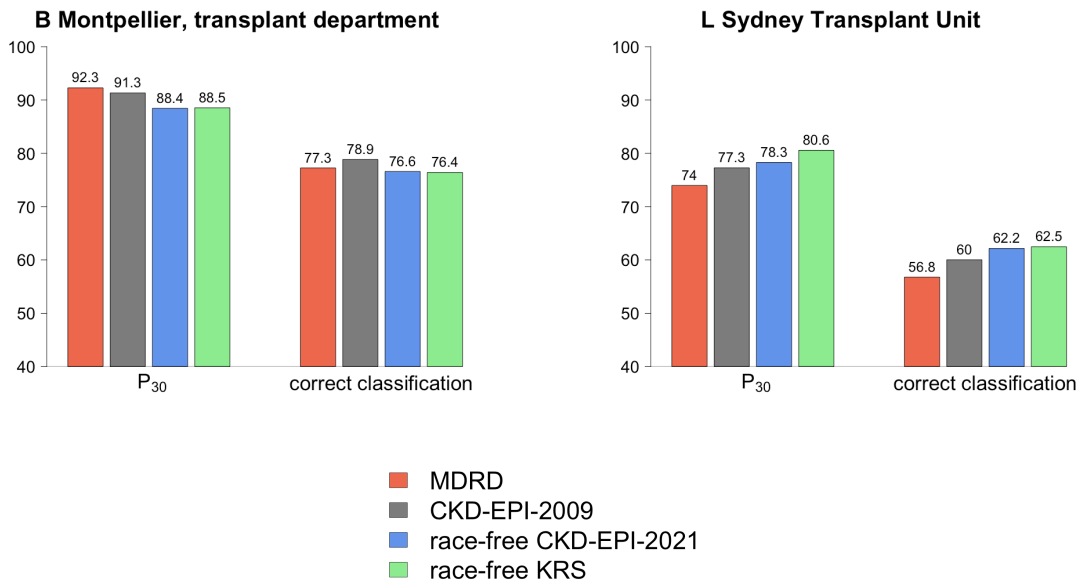

**Figure 20 – Performances of GFR equations in patients whose GFR was measured with the <sup>51</sup>Cr-EDTA clearance**

The P<sub>30</sub> is the proportion of the eGFR within the 30% of the mGFR. The correct classification is the agreement between eGFR and mGFR according to the GFR stages.

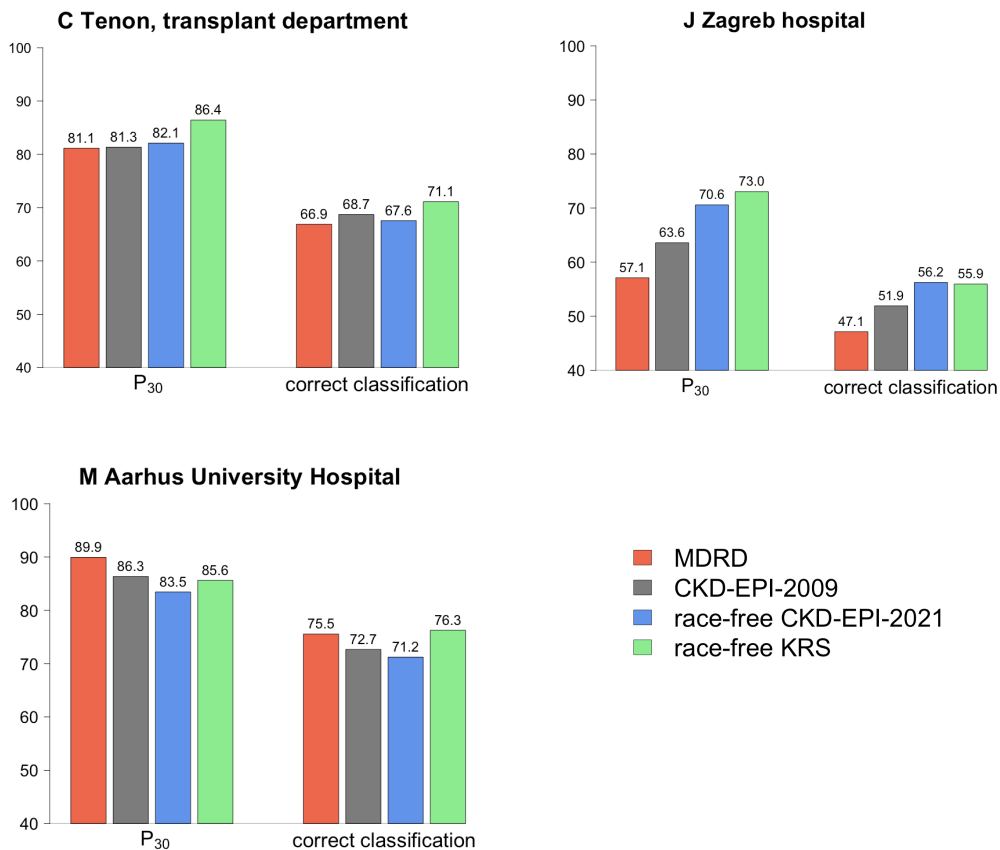



**Figure 21 – Performances of GFR equations in patients whose GFR was measured with the inulin clearance**

The P<sub>30</sub> is the proportion of the eGFR within the 30% of the mGFR. The correct classification is the agreement between eGFR and mGFR according to the GFR stages.

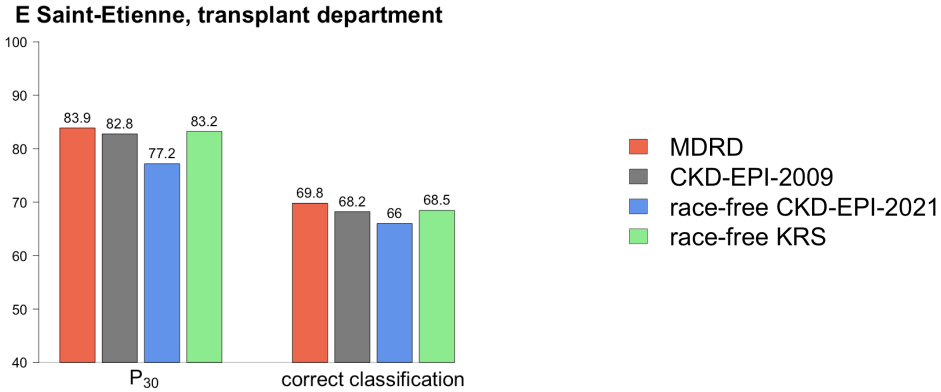

**Figure 22 – Performances of GFR equations in patients whose GFR was measured with the iohexol clearance**

The P<sub>30</sub> is the proportion of the eGFR within the 30% of the mGFR. The correct classification is the agreement between eGFR and mGFR according to the GFR stages.

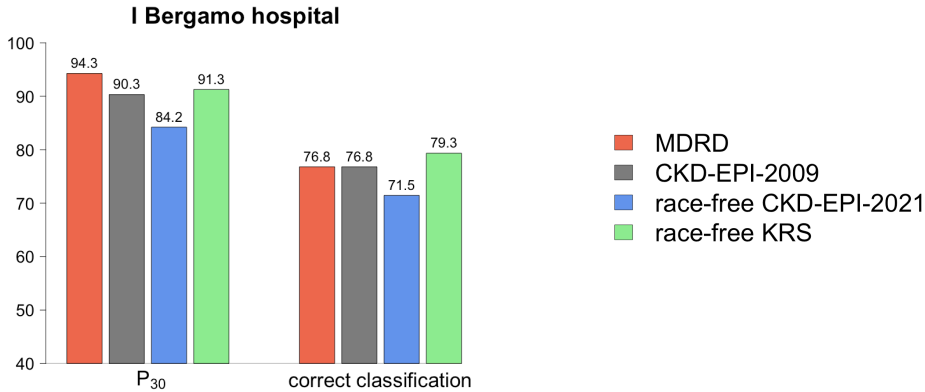

**Figure 23 – Performances of GFR equations in patients whose GFR was measured with the iothalamate clearance**

The P<sub>30</sub> is the proportion of the eGFR within the 30% of the mGFR. The correct classification is the agreement between eGFR and mGFR according to the GFR stages.

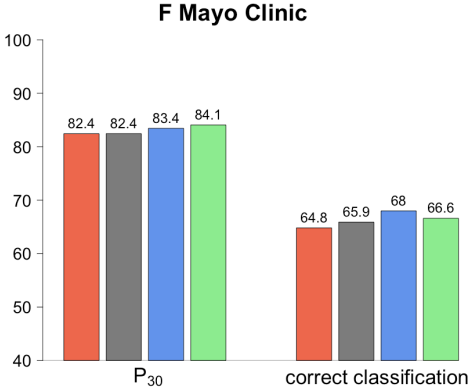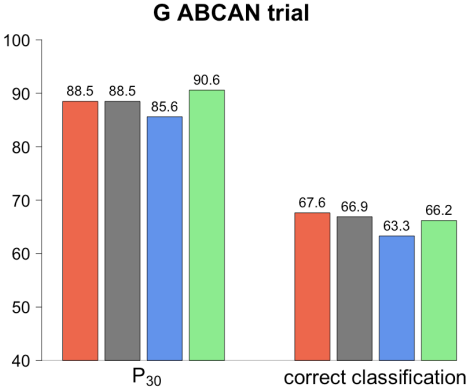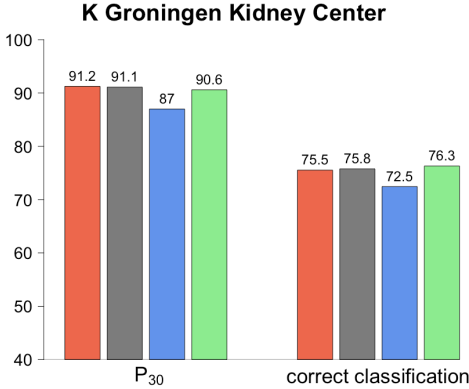

- MDRD
- CKD-EPI-2009
- race-free CKD-EPI-2021
- race-free KRS

**Figure 24 – Performances of GFR equations in living donor patients**

The P<sub>30</sub> is the proportion of the eGFR within the 30% of the mGFR. The correct classification is the agreement between eGFR and mGFR according to the GFR stages.

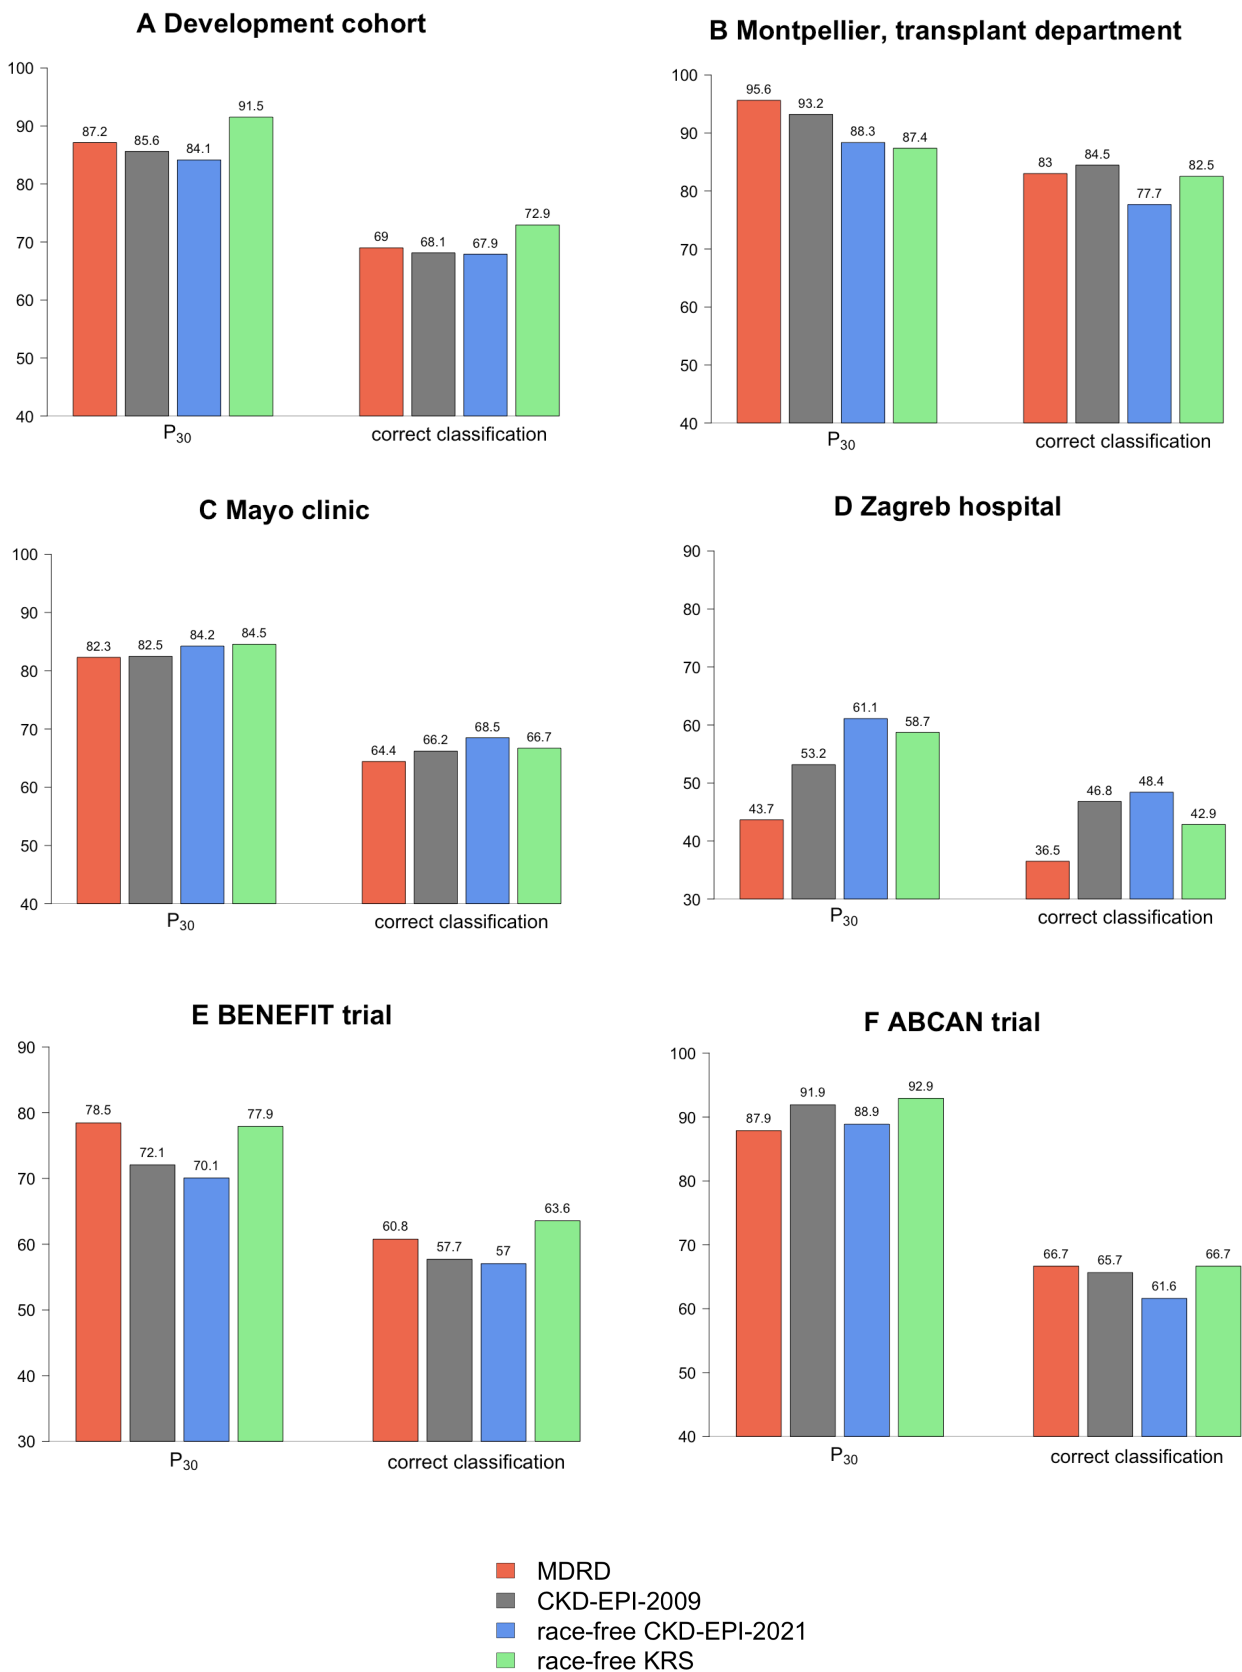

- MDRD
- CKD-EPI-2009
- race-free CKD-EPI-2021
- race-free KRS

**Figure 25 – Performances of GFR equations in deceased donor patients**

The  $P_{30}$  is the proportion of the eGFR within the 30% of the mGFR. The correct classification is the agreement between eGFR and mGFR according to the GFR stages.

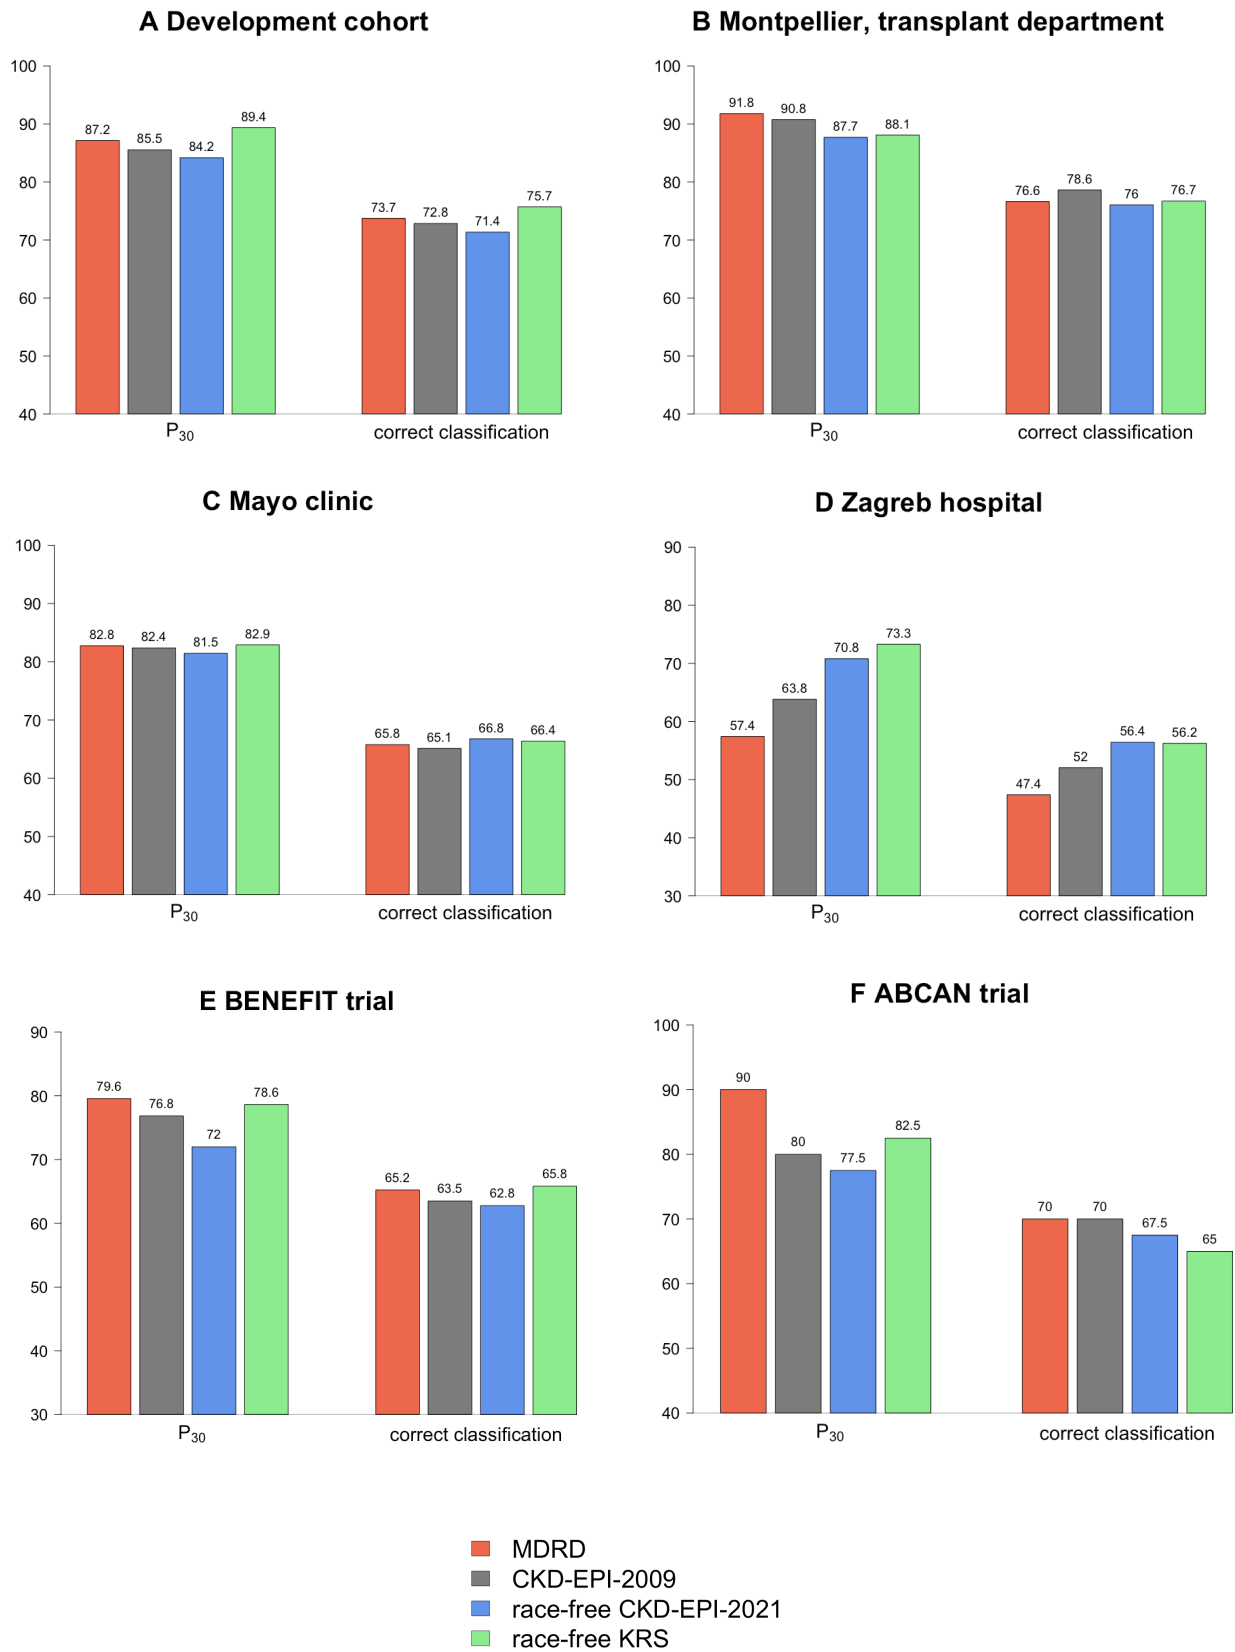

**Figure 26 – Performances of GFR equations in patients with younger donor**

The P<sub>30</sub> is the proportion of the eGFR within the 30% of the mGFR. The correct classification is the agreement between eGFR and mGFR according to the GFR stages.

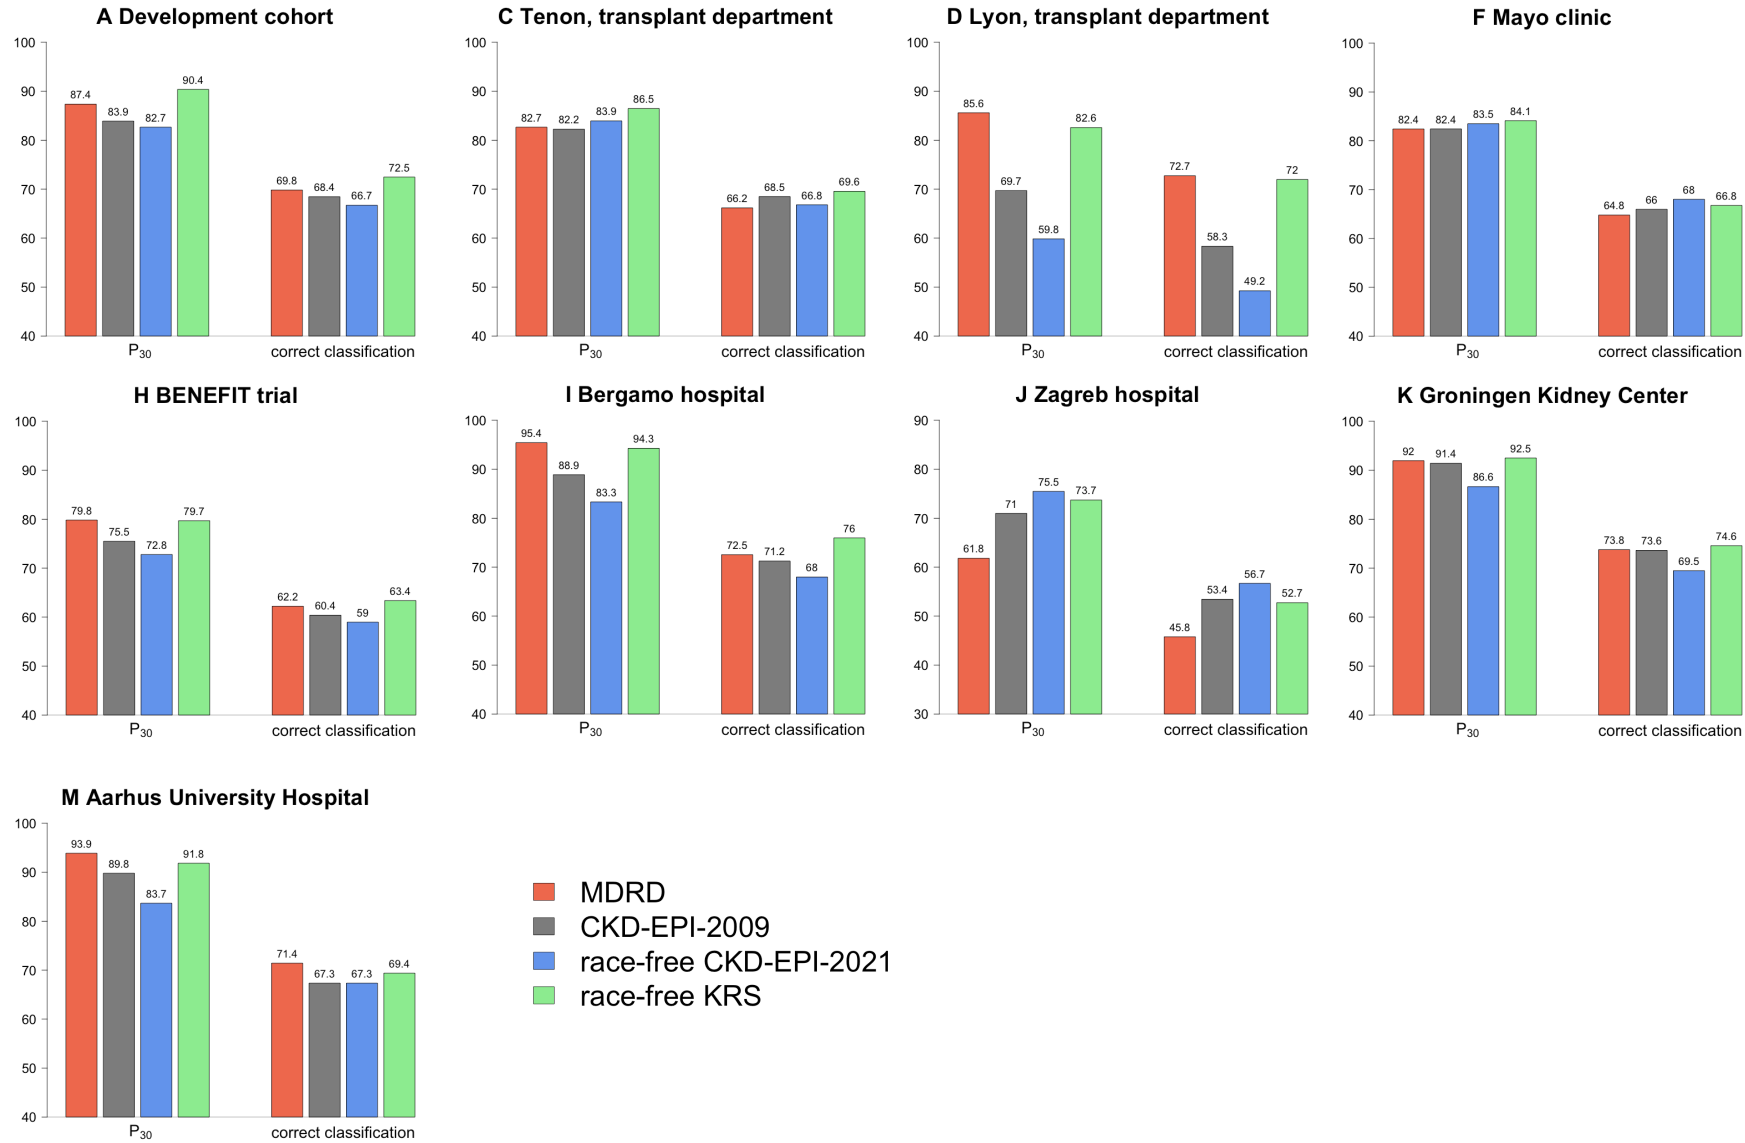

**Figure 27 – Performances of GFR equations in patients with older donor**

The P<sub>30</sub> is the proportion of the eGFR within the 30% of the mGFR. The correct classification is the agreement between eGFR and mGFR according to the GFR stages.

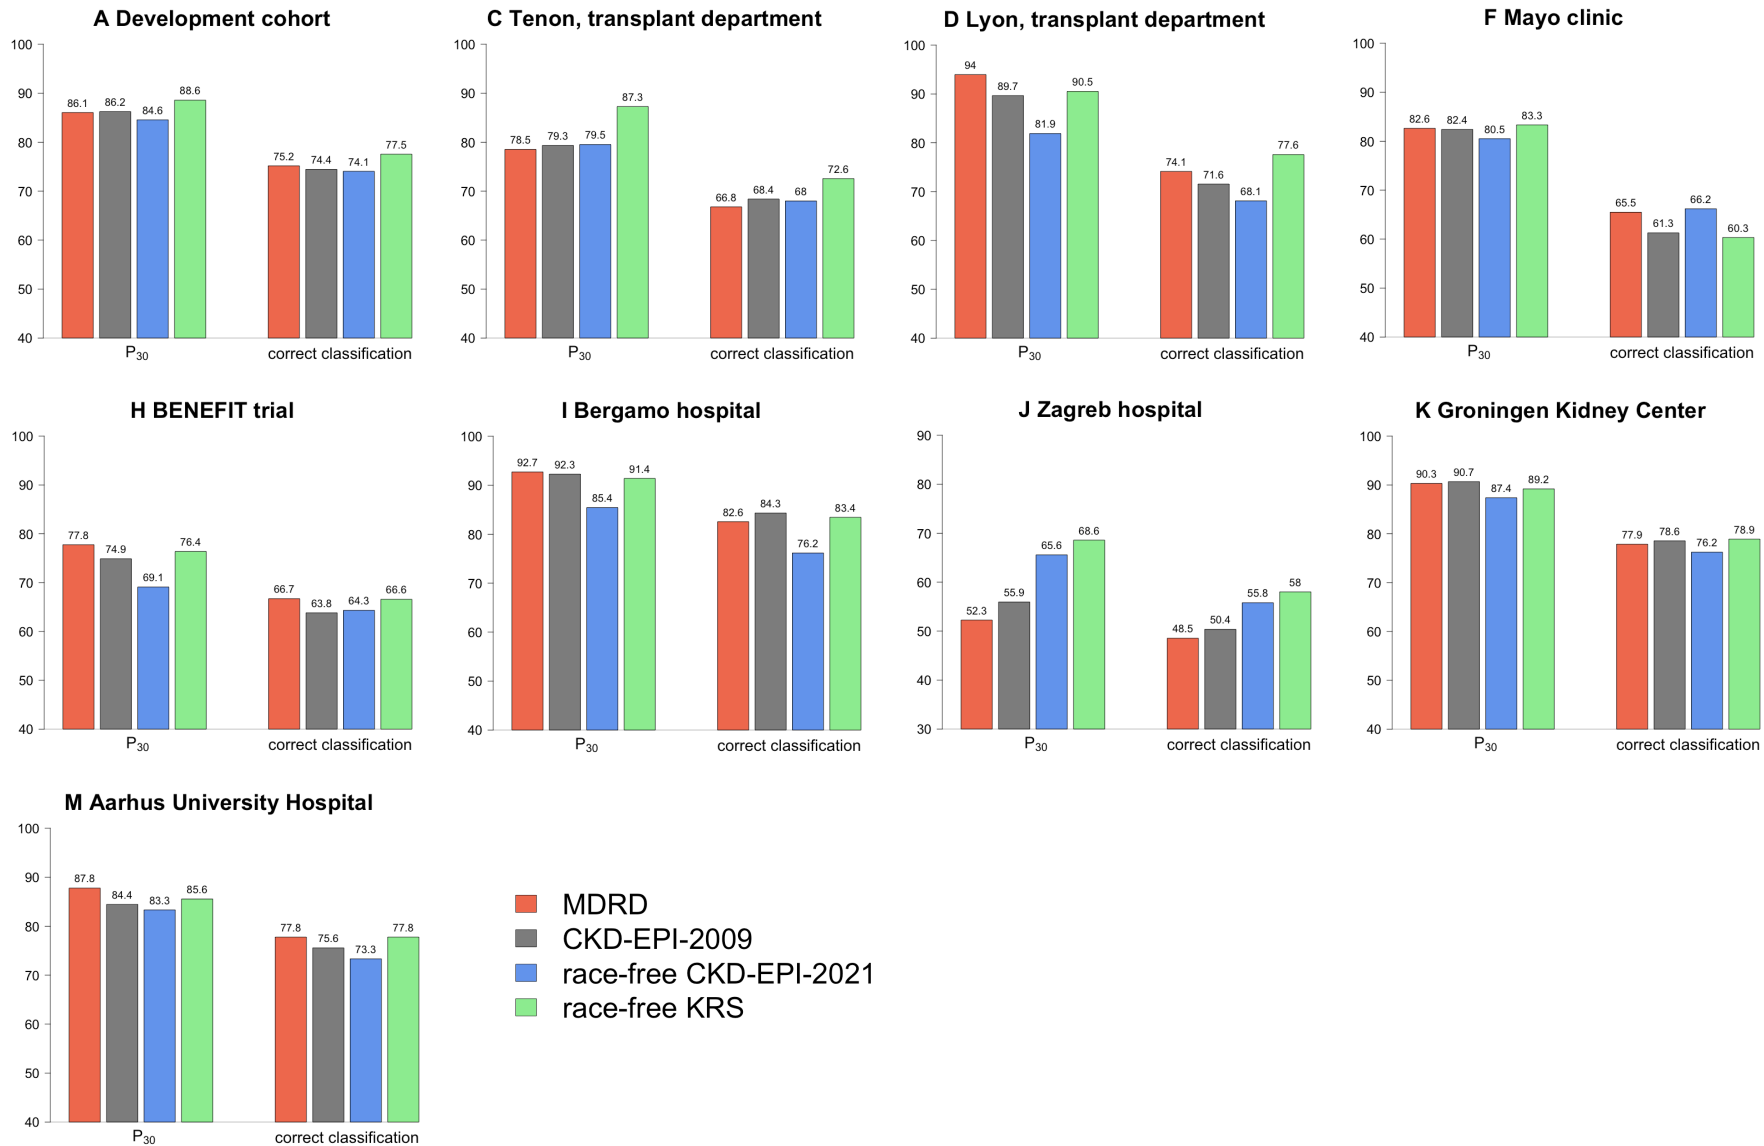

**Figure 28 – Performances of GFR equations in patients whose age discrepancy with the donor is greater than 10 years**

The P<sub>30</sub> is the proportion of the eGFR within the 30% of the mGFR. The correct classification is the agreement between eGFR and mGFR according to the GFR stages.

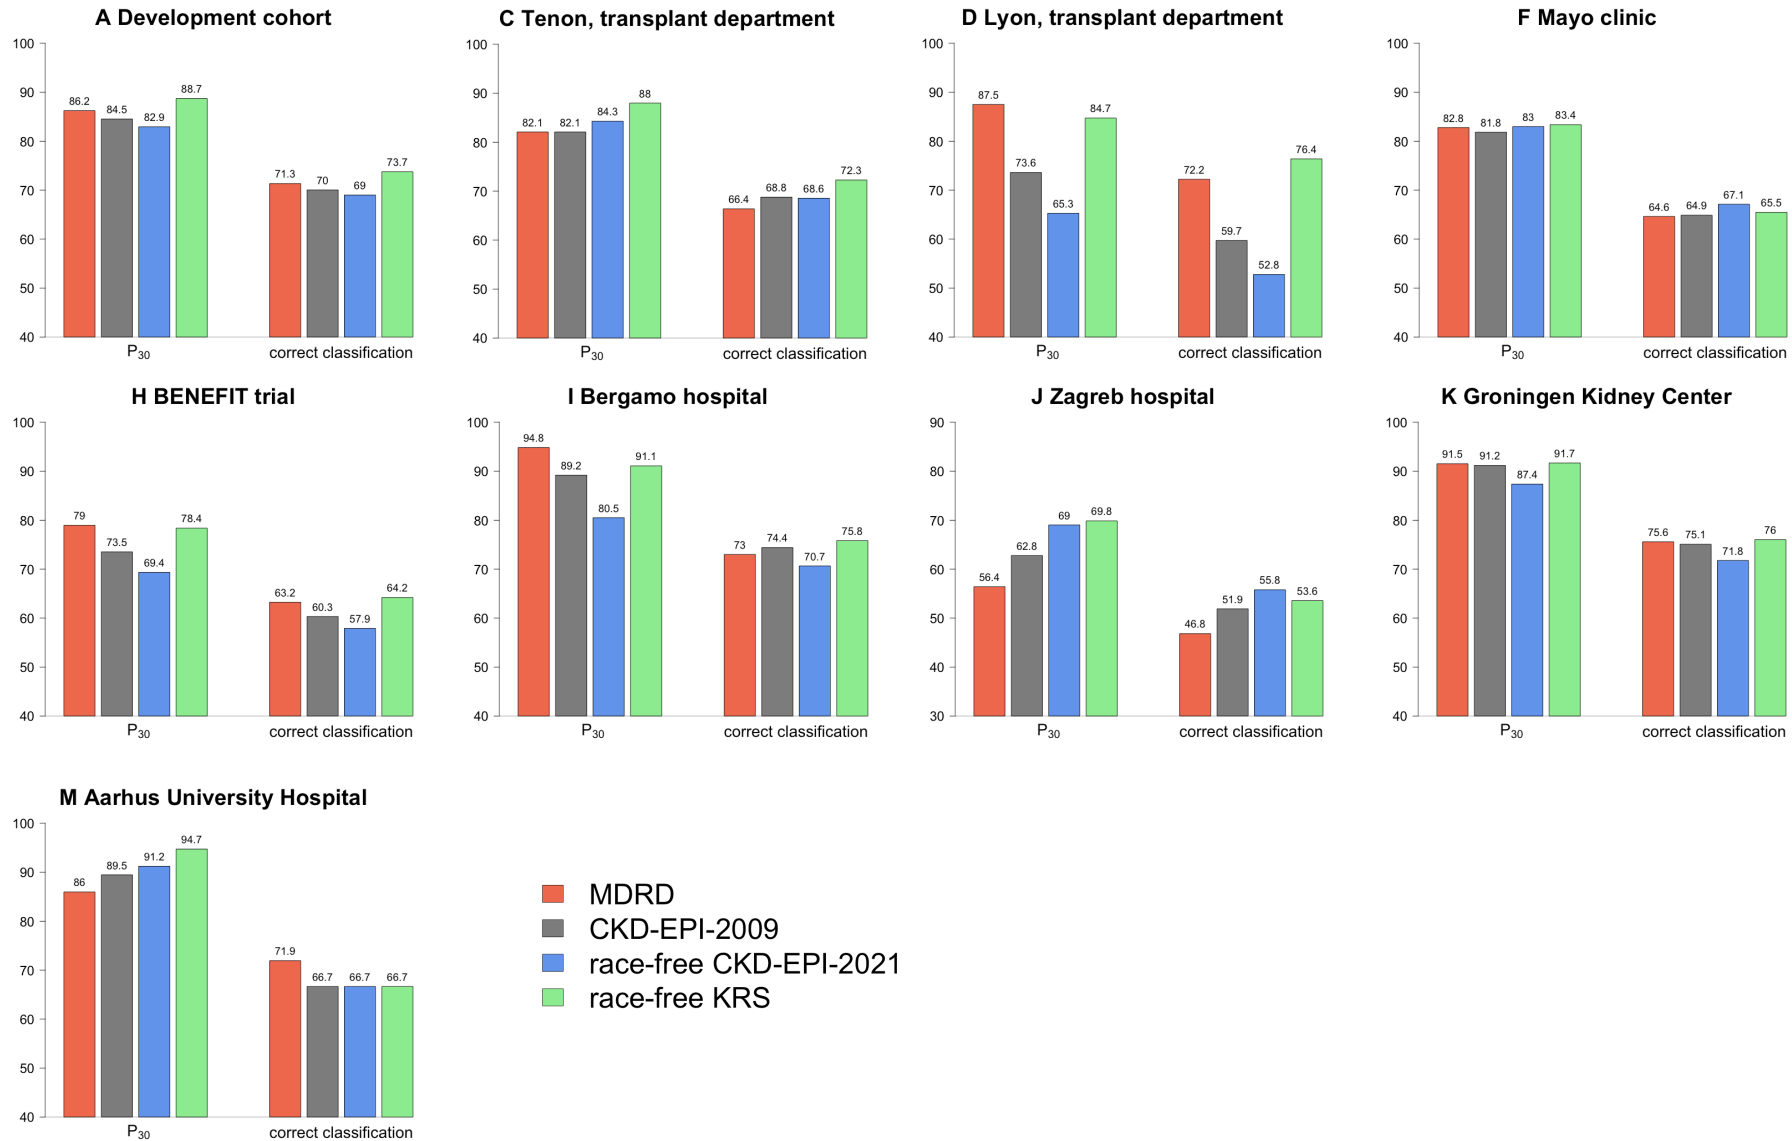

**Figure 29 – Performances of GFR equations in patients whose age discrepancy with the donor is lower than 10 years**

The P<sub>30</sub> is the proportion of the eGFR within the 30% of the mGFR. The correct classification is the agreement between eGFR and mGFR according to the GFR stages.

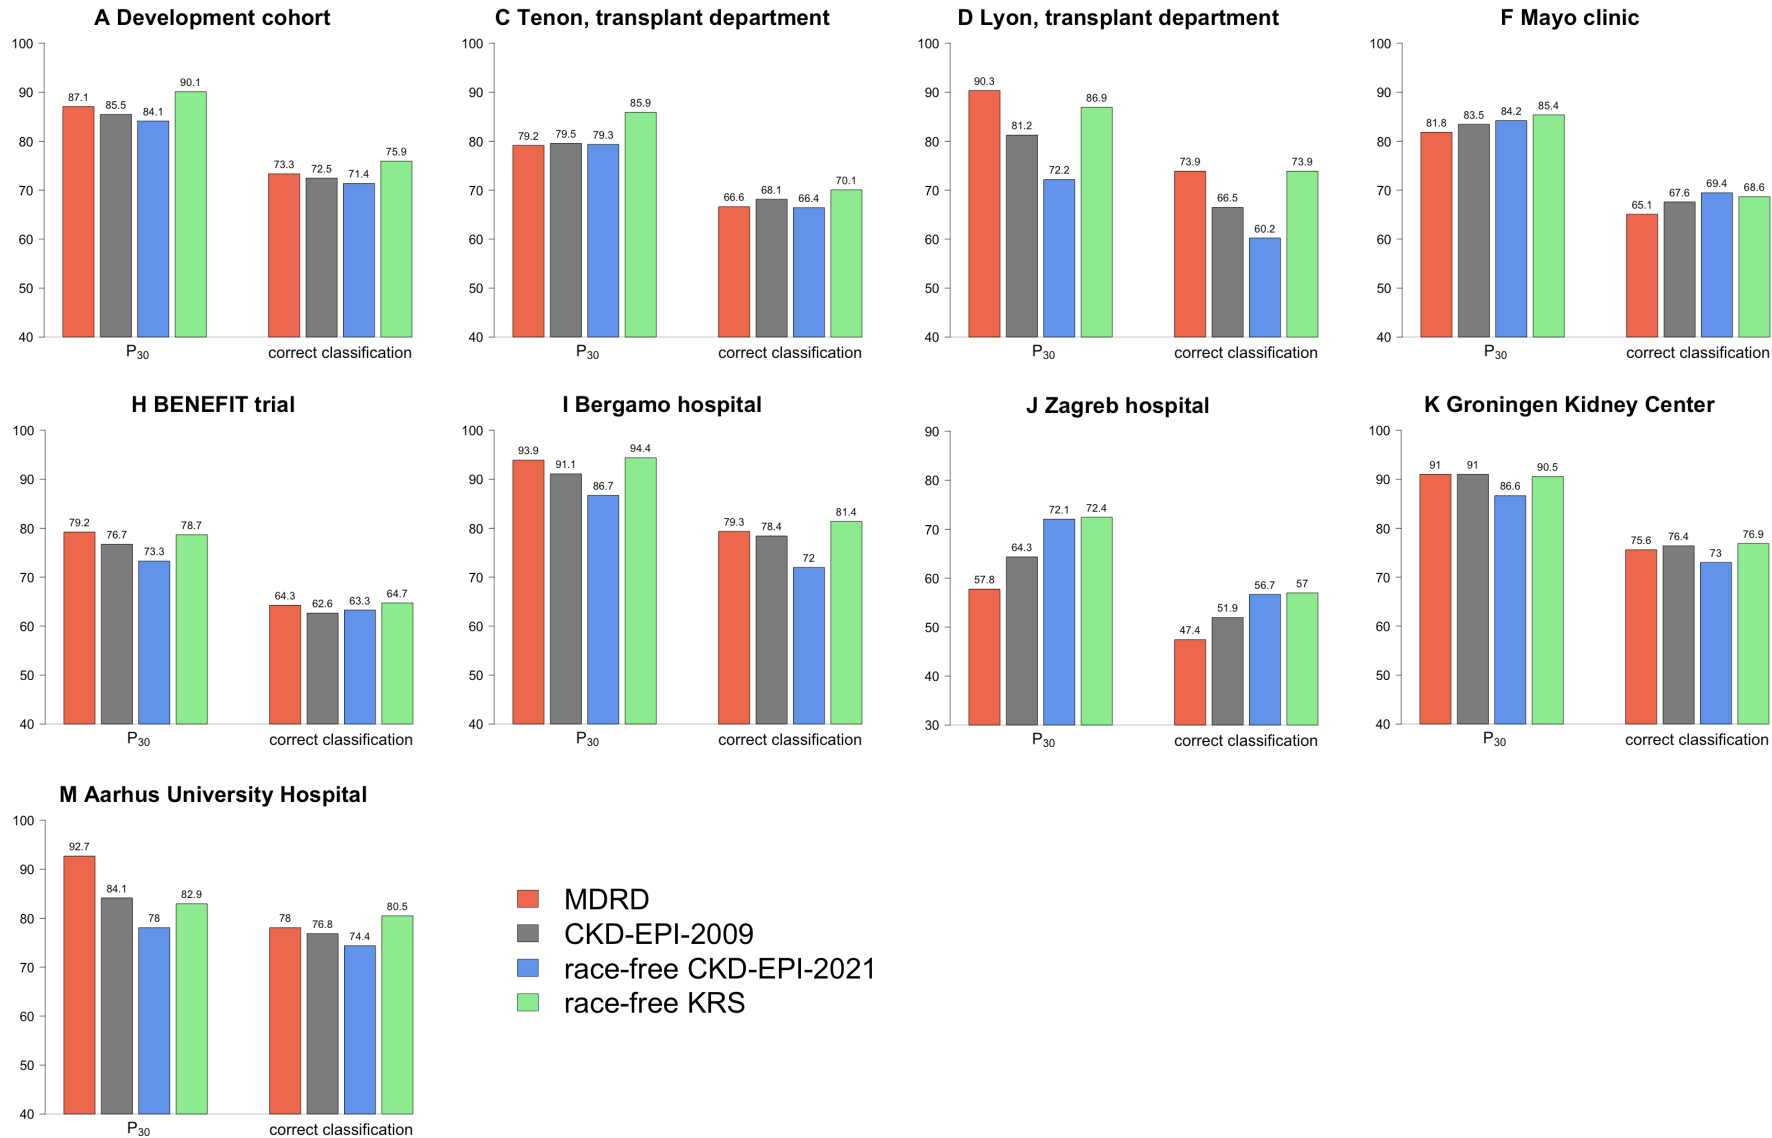



**Figure 30 – Performances of GFR equations in patients with CNI**

The P<sub>30</sub> is the proportion of the eGFR within the 30% of the mGFR. The correct classification is the agreement between eGFR and mGFR according to the GFR stages.

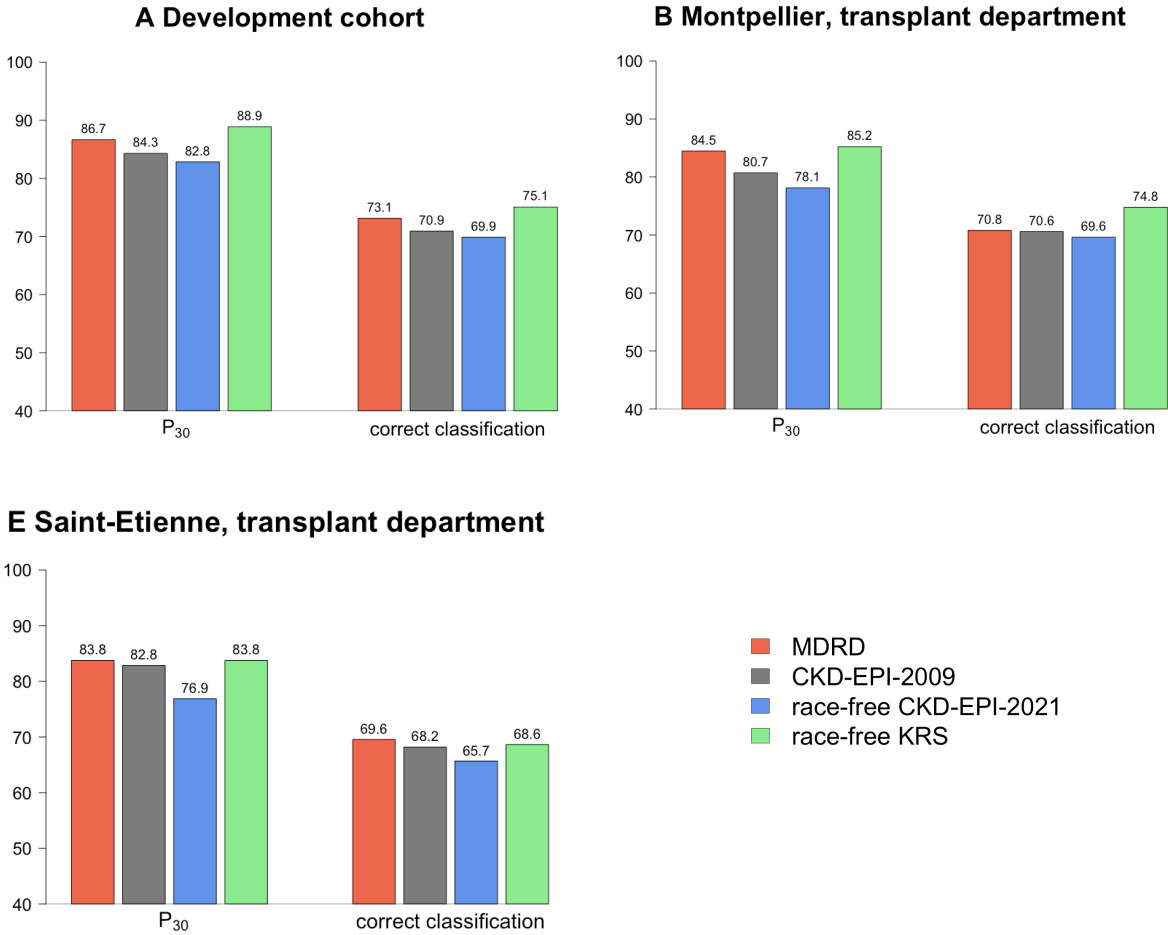

**Figure 31 – Performances of GFR equations in patients with mTOR**

The P<sub>30</sub> is the proportion of the eGFR within the 30% of the mGFR. The correct classification is the agreement between eGFR and mGFR according to the GFR stages. This analysis was performed in the development cohort only.

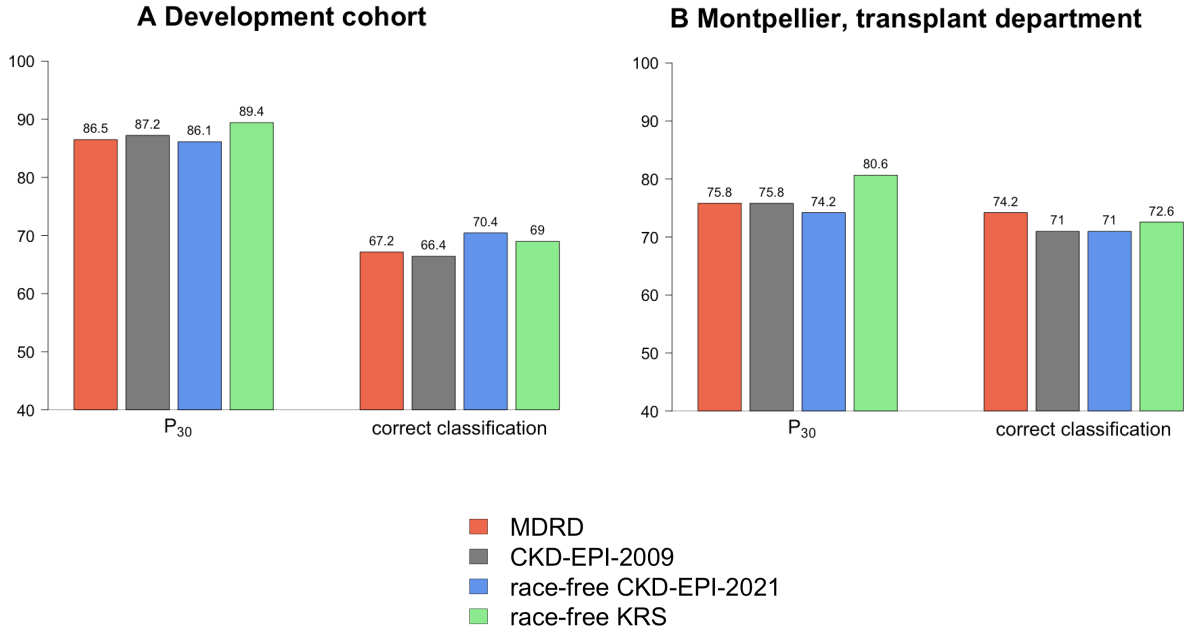

**Figure 32 – Performances of GFR equations in patients with mTOR vs CNI : overall population**  
The P<sub>30</sub> is the proportion of the eGFR within the 30% of the mGFR. The correct classification is the agreement between eGFR and mGFR according to the GFR stages. This analysis was performed in the development cohort only.

### Impact of CNI vs mTOR

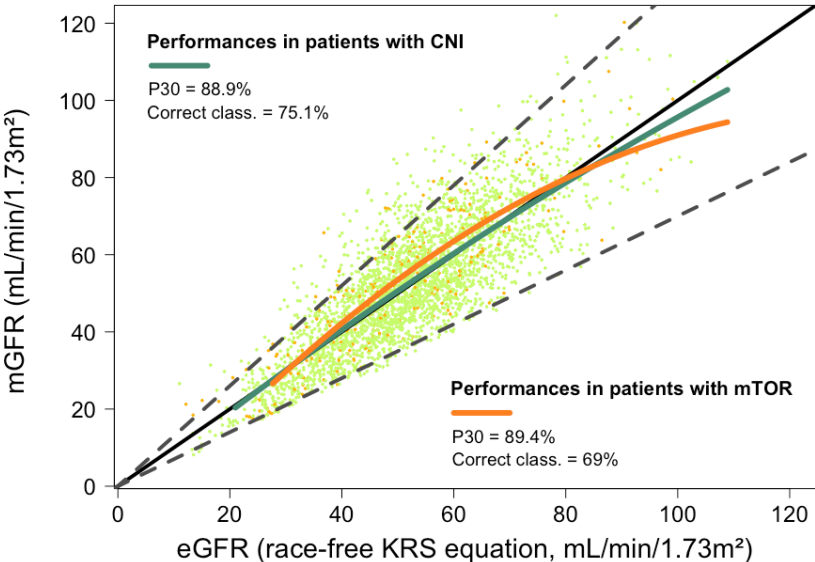

**Figure 33 – Performances of GFR equations in patients with belatacept from the BENEFIT and BENEFIT-EXT trials**

The  $P_{30}$  is the proportion of the eGFR within the 30% of the mGFR. The correct classification is the agreement between eGFR and mGFR according to the GFR stages.

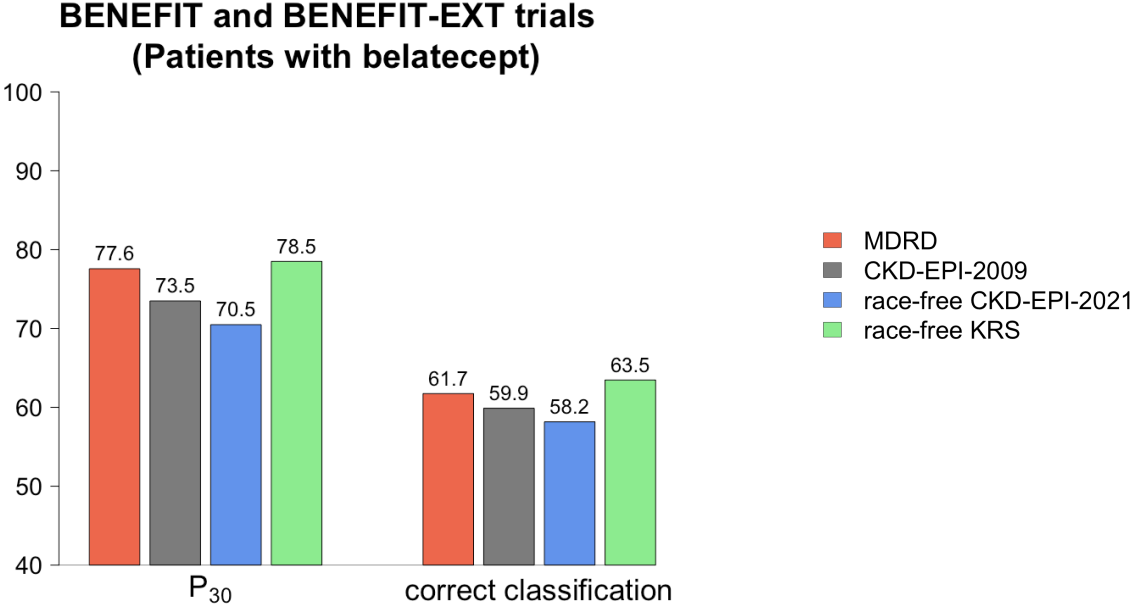

**Figure 34 – Performances of GFR equations in patients whose GFR were measured before one year post-transplant**

The P<sub>30</sub> is the proportion of the eGFR within the 30% of the mGFR. The correct classification is the agreement between eGFR and mGFR according to the GFR stages.

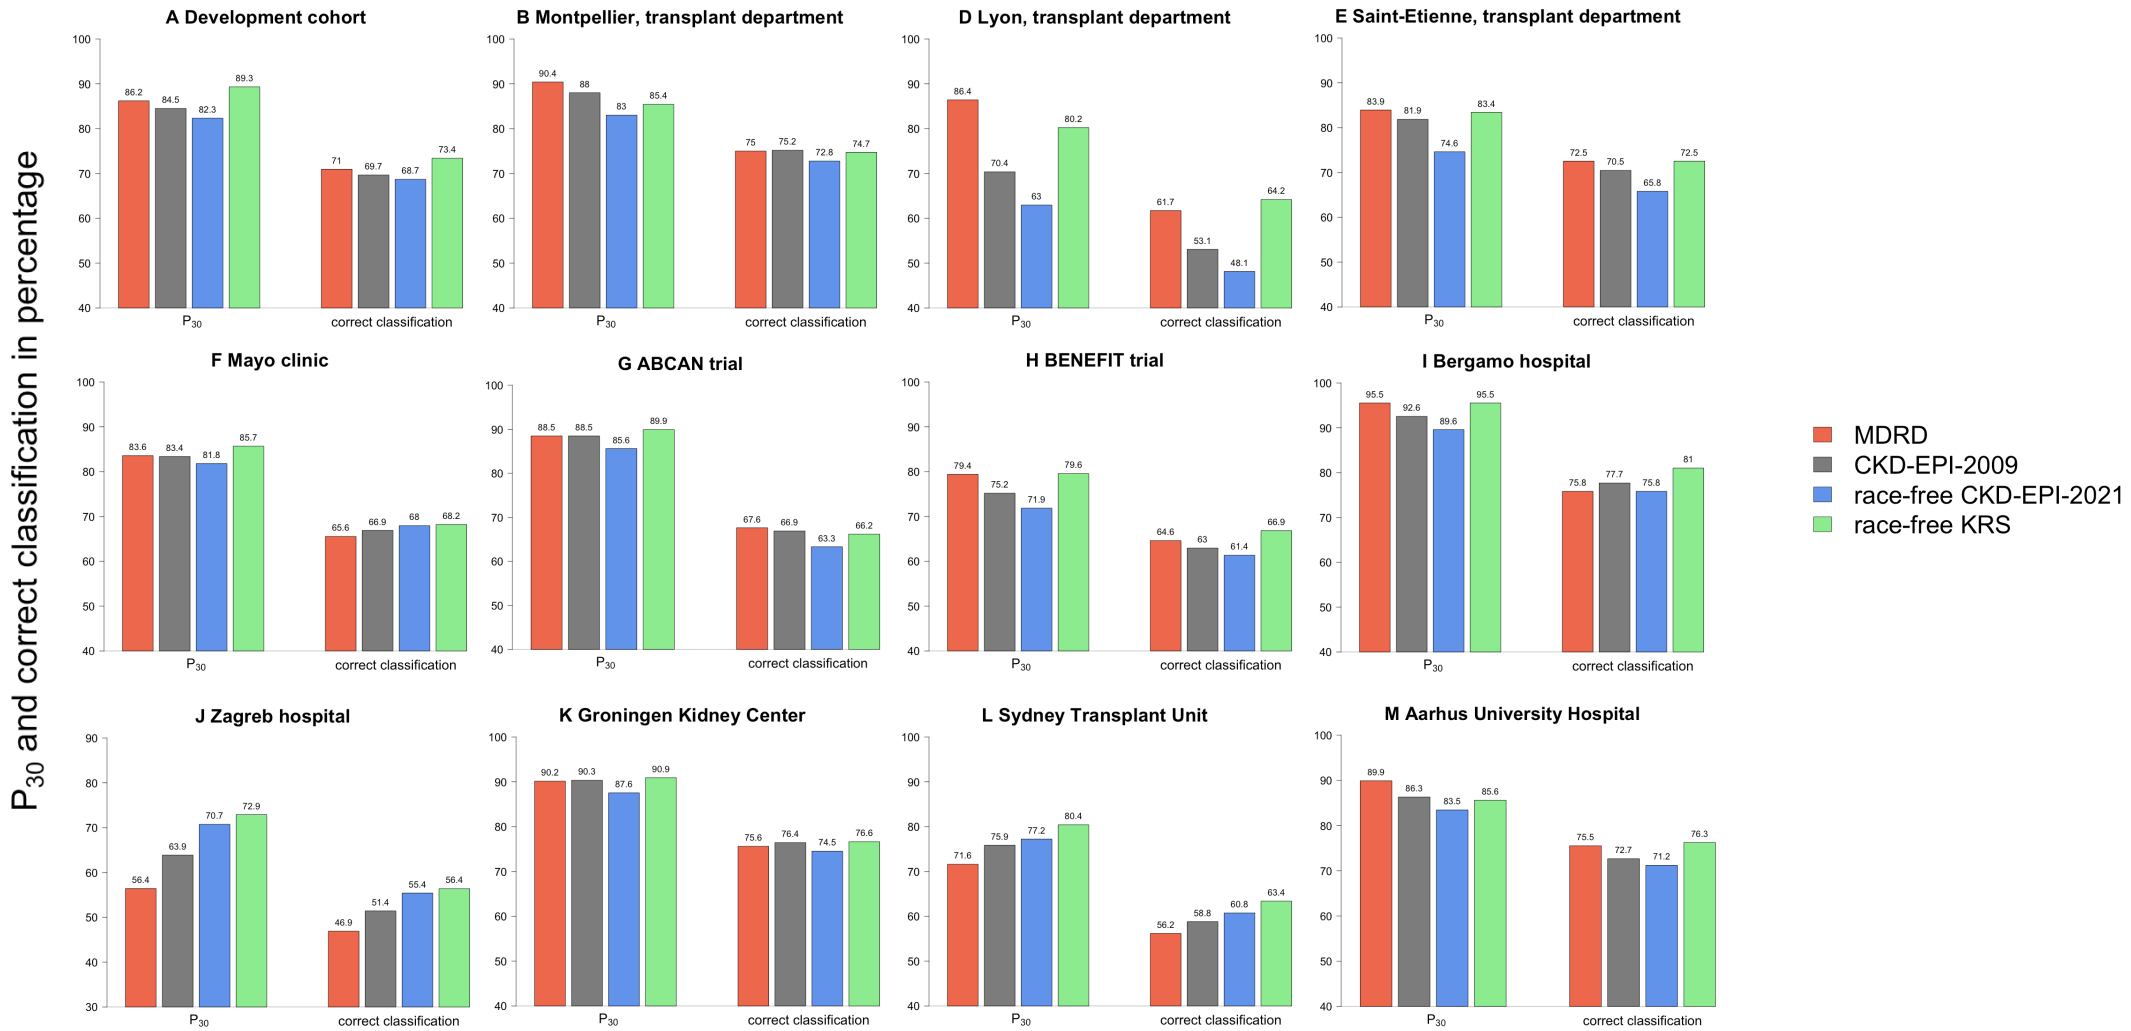

**Figure 35 – Performances of GFR equations in patients whose GFR were measured after one year post-transplant**

The P<sub>30</sub> is the proportion of the eGFR within the 30% of the mGFR. The correct classification is the agreement between eGFR and mGFR according to the GFR stages.

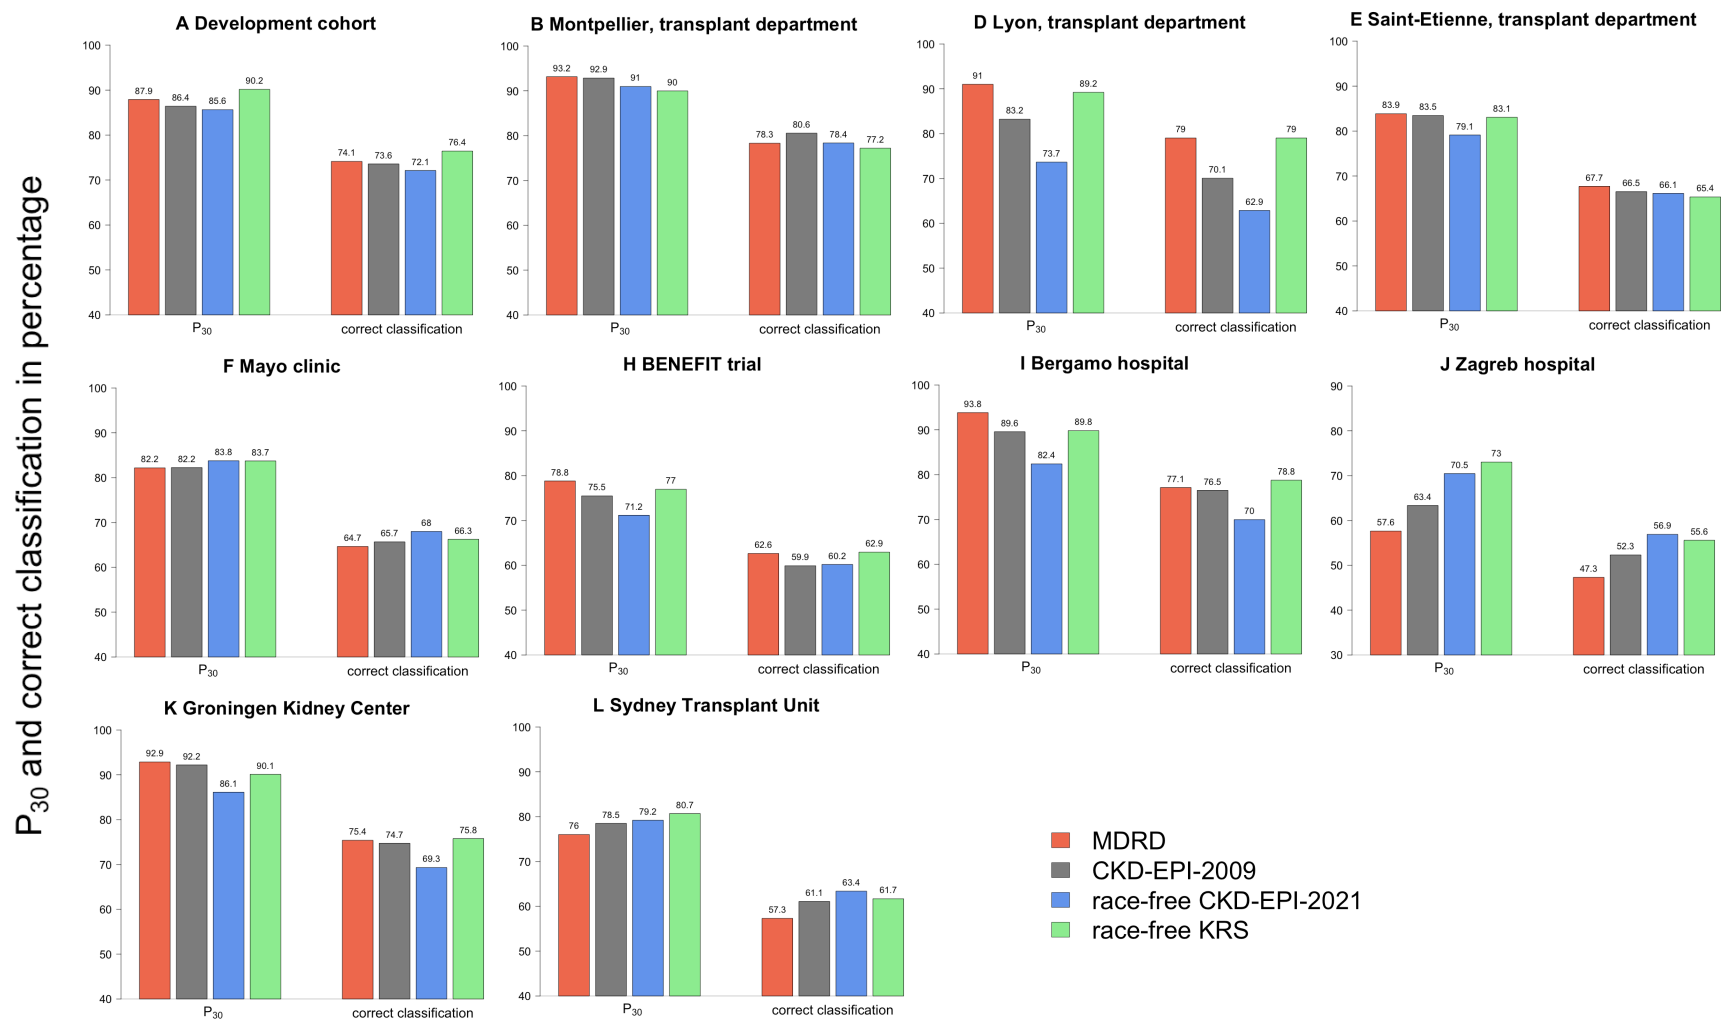

**Figure 36 – Performances of GFR equations in patients with pre-emptive transplantation and patients transplanted after dialysis initiation**

The P<sub>30</sub> is the proportion of the eGFR within the 30% of the mGFR. The correct classification is the agreement between eGFR and mGFR according to the GFR stages.

**Impact of pre-emptive transplantation and initiation of dialysis**

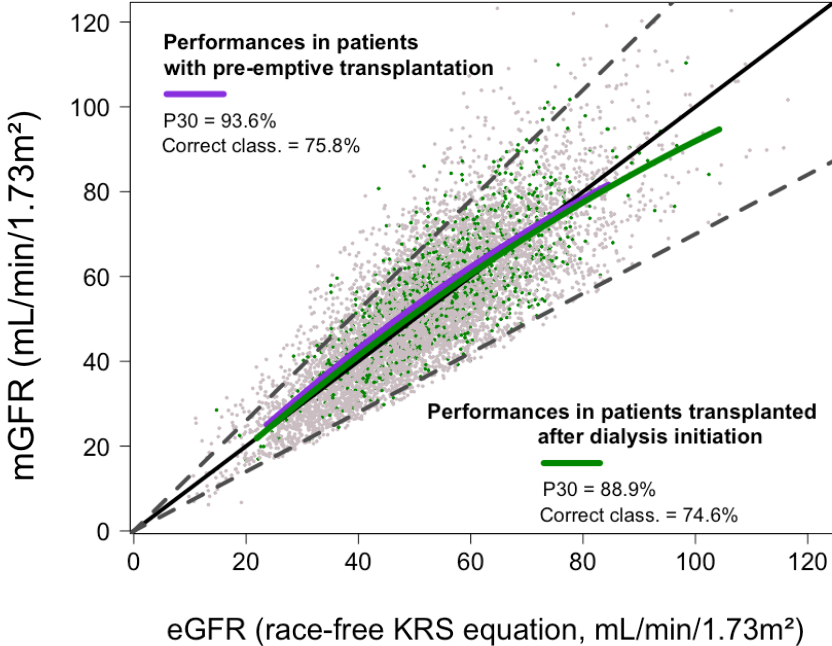

## References

1. Edwards KD, Whyte HM. Plasma creatinine level and creatinine clearance as tests of renal function. *Australas Ann Med.* 1959 Aug;8:218–24.
2. Jelliffe RW. Estimation of creatinine clearance when urine cannot be collected. *Lancet.* 1971 May 8;1(7706):975–6.
3. Jelliffe RW. Creatinine Clearance: Bedside Estimate. *Ann Intern Med.* 1973 Oct 1;79(4):604–5.
4. Rowe JW, Andres R, Tobin JD, Norris AH, Shock NW. Age-Adjusted Standards for Creatinine Clearance. *Ann Intern Med.* 1976 May 1;84(5):567–9.
5. Cockcroft DW, Gault MH. Prediction of creatinine clearance from serum creatinine. *Nephron.* 1976;16(1):31–41.
6. Bjornsson TD. Use of serum creatinine concentrations to determine renal function. *Clin Pharmacokinet.* 1979 Jun;4(3):200–22.
7. Hull JH, Hak LJ, Koch GG, Wargin WA, Chi SL, Mattocks AM. Influence of range of renal function and liver disease on predictability of creatinine clearance. *Clin Pharmacol Ther.* 1981 Apr;29(4):516–21.
8. Gates GF. Creatinine clearance estimation from serum creatinine values: an analysis of three mathematical models of glomerular function. *Am J Kidney Dis.* 1985 Mar;5(3):199–205.
9. Walser M, Drew HH, Guldan JL. Prediction of glomerular filtration rate from serum creatinine concentration in advanced chronic renal failure. *Kidney Int.* 1993 Nov;44(5):1145–8.
10. Nankivell BJ, Alexander SI. Rejection of the kidney allograft. *N Engl J Med.* 2010 Oct 7;363(15):1451–62.
11. Baracska D, Jarjoura D, Cugino A, Blend D, Rutecki GW, Whittier FC. Geriatric renal function: estimating glomerular filtration in an ambulatory elderly population. *Clin Nephrol.* 1997 Apr;47(4):222–8.
12. Levey AS, Bosch JP, Lewis JB, Greene T, Rogers N, Roth D. A more accurate method to estimate glomerular filtration rate from serum creatinine: a new prediction equation. Modification of Diet in Renal Disease Study Group. *Ann Intern Med.* 1999 Mar 16;130(6):461–70.
13. Hoek FJ, Kemperman FAW, Krediet RT. A comparison between cystatin C, plasma creatinine and the Cockcroft and Gault formula for the estimation of glomerular filtration rate. *Nephrol Dial Transplant.* 2003 Oct;18(10):2024–31.
14. Rule AD, Larson TS, Bergstralh EJ, Slezak JM, Jacobsen SJ, Cosio FG. Using serum creatinine to estimate glomerular filtration rate: accuracy in good health and in chronic kidney disease. *Ann Intern Med.* 2004 Dec 21;141(12):929–37.
15. Grubb A, Björk J, Lindström V, Sterner G, Bondesson P, Nyman U. A cystatin C-based formula without anthropometric variables estimates glomerular filtration rate better than creatinine clearance using the Cockcroft-Gault formula. *Scand J Clin Lab Invest.* 2005;65(2):153–62.
16. Sjöström P, Tidman M, Jones I. Determination of the production rate and non-renal clearance of cystatin C and estimation of the glomerular filtration rate from the serum concentration of cystatin C in humans. *Scand J Clin Lab Invest.* 2005;65(2):111–24.
17. MacIsaac RJ, Tsalamandris C, Thomas MC, Premaratne E, Panagiotopoulos S, Smith TJ, et al. Estimating glomerular filtration rate in diabetes: a comparison of cystatin-C- and creatinine-based methods. *Diabetologia.* 2006 Jul 1;49(7):1686–9.



18. Rule AD, Bergstralh EJ, Slezak JM, Bergert J, Larson TS. Glomerular filtration rate estimated by cystatin C among different clinical presentations. *Kidney Int.* 2006 Jan;69(2):399–405.
19. Virga G, Gaspari F, Thomaseth K, Cara M, Mastrosimone S, Rossi V. A New Equation for Estimating Renal Function Using Age, Body Weight and Serum Creatinine. *NEC.* 2007;105(2):c43–53.
20. Stevens LA, Coresh J, Schmid CH, Feldman HI, Froissart M, Kusek J, et al. Estimating GFR using serum cystatin C alone and in combination with serum creatinine: a pooled analysis of 3,418 individuals with CKD. *Am J Kidney Dis.* 2008 Mar;51(3):395–406.
21. Douville P, Martel AR, Talbot J, Desmeules S, Langlois S, Agharazii M. Impact of age on glomerular filtration estimates. *Nephrol Dial Transplant.* 2009 Jan;24(1):97–103.
22. Matsuo S, Imai E, Horio M, Yasuda Y, Tomita K, Nitta K, et al. Revised equations for estimated GFR from serum creatinine in Japan. *Am J Kidney Dis.* 2009 Jun;53(6):982–92.
23. Levey AS, Stevens LA, Schmid CH, Zhang Y (Lucy), Castro AF, Feldman HI, et al. A New Equation to Estimate Glomerular Filtration Rate. *Ann Intern Med.* 2009 May 5;150(9):604–12.
24. Diamandopoulos A, Goudas P, Arvanitis A. Comparison of estimated creatinine clearance among five formulae (Cockcroft-Gault, Jelliffe, Sanaka, simplified 4-variable MDRD and DAF) and the 24hours-urine-collection creatinine clearance. *Hippokratia.* 2010 Apr;14(2):98–104.
25. Björk J, Grubb A, Sterner G, Nyman U. Revised equations for estimating glomerular filtration rate based on the Lund-Malmö Study cohort. *Scand J Clin Lab Invest.* 2011 May;71(3):232–9.
26. Alvarez-Gregori JA, Robles NR, Mena C, Ardanuy R, Jauregui R, Macas-Nu Nunez JF. The value of a formula including haematocrit, blood urea and gender (HUGE) as a screening test for chronic renal insufficiency. *J Nutr Health Aging.* 2011 Jun;15(6):480–4.
27. Schaeffner ES, Ebert N, Delanaye P, Frei U, Gaedeke J, Jakob O, et al. Two novel equations to estimate kidney function in persons aged 70 years or older. *Ann Intern Med.* 2012 Oct 2;157(7):471–81.
28. Inker LA, Schmid CH, Tighiouart H, Eckfeldt JH, Feldman HI, Greene T, et al. Estimating glomerular filtration rate from serum creatinine and cystatin C. *N Engl J Med.* 2012 Jul 5;367(1):20–9.
29. Pottel H, Hoste L, Dubourg L, Ebert N, Schaeffner E, Eriksen BO, et al. An estimated glomerular filtration rate equation for the full age spectrum. *Nephrology Dialysis Transplantation.* 2016 May 1;31(5):798–806.
30. Salvador CL, Hartmann A, Åsberg A, Bergan S, Rowe AD, Mørkrid L. Estimating Glomerular Filtration Rate in Kidney Transplant Recipients: Comparing a Novel Equation With Commonly Used Equations in this Population. *Transplant Direct.* 2017 Nov 8;3(12):e332.
31. Pottel H, Björk J, Courbebaisse M, Couzi L, Ebert N, Eriksen BO, et al. Development and Validation of a Modified Full Age Spectrum Creatinine-Based Equation to Estimate Glomerular Filtration Rate : A Cross-sectional Analysis of Pooled Data. *Ann Intern Med.* 2021 Feb;174(2):183–91.
32. Inker LA, Eneanya ND, Coresh J, Tighiouart H, Wang D, Sang Y, et al. New Creatinine- and Cystatin C–Based Equations to Estimate GFR without Race. *New England Journal of Medicine.* 2021 Nov 4;385(19):1737–49.
33. Björk J, Nyman U, Courbebaisse M, Couzi L, Dalton RN, Dubourg L, et al. Prospects for improved glomerular filtration rate estimation based on creatinine—results from a transnational multicentre study. *Clinical Kidney Journal.* 2020 Aug 1;13(4):674–83.

34. Haymann JP, Hammoudi N, Livrozet M, Santin A, Mattioni S, Letavernier E, et al. Hemodynamic and biological correlates of glomerular hyperfiltration in sickle cell patients before and under renin–angiotensin system blocker. *Sci Rep.* 2021 Jun 3;11:11682.
